# Supplementary material for: Arene extrusion as an approach to reductive elimination at boron: implication of carbene-ligated haloborylene as a transient reactive intermediate
Source: Royal Society of Chemistry journal article supplement (doi:10.1039/d4sc05524a), 2024-01-01
Supplement: d4sc05524a1.pdf [file d4sc05524a1.pdf]

# Supporting Information

## Arene extrusion as an approach to reductive elimination at boron: Implication of carbene-ligated haloborylene as a transient reactive intermediate

Chonghe Zhang, Robert J. Gilliard Jr.\*, and Christopher C. Cummins\*

Department of Chemistry, Massachusetts Institute of Technology, Cambridge, Massachusetts 02139, United States

### Supporting Information Contents:

|                                                                         |            |
|-------------------------------------------------------------------------|------------|
| <b>Synthetic details and characterization data</b>                      | <b>S2</b>  |
| General considerations                                                  | S2         |
| Synthesis of <b>1<sup>Cl</sup></b>                                      | S2         |
| Synthesis of <b>1<sup>Br</sup></b>                                      | S4         |
| Synthesis of <b>2<sup>Cl</sup></b>                                      | S6         |
| Synthesis of <b>2<sup>Br</sup></b>                                      | S8         |
| Synthesis of <b>2<sup>Ph</sup></b>                                      | S10        |
| Synthesis of <b>6</b>                                                   | S10        |
| Synthesis of <b>7</b>                                                   | S12        |
| The reaction of <b>2<sup>Cl</sup></b> with <sup>Et</sup> CAAC           | S14        |
| The reaction of <b>2<sup>Cl</sup></b> with <sup>Cy</sup> CAAC           | S21        |
| Heating <b>7</b> in toluene                                             | S25        |
| Heating <b>7</b> in DCM (or <i>o</i> -difluorobenzene)                  | S31        |
| Synthesis of <b>10<sup>Cl</sup></b> (mixed with <b>2<sup>Cl</sup></b> ) | S35        |
| Synthesis of <b>10<sup>Br</sup></b> (mixed with <b>2<sup>Br</sup></b> ) | S37        |
| <b>Crystal structure</b>                                                | <b>S40</b> |
| <b>Computational Studies</b>                                            | <b>S51</b> |
| <b>Discussion on other possible mechanism</b>                           | <b>S56</b> |
| <b>Reference</b>                                                        | <b>S57</b> |

## Synthetic details and characterization data

**General considerations:** all manipulations were performed in a Vacuum Atmospheres model MO-40M glovebox under an inert atmosphere of purified N<sub>2</sub> or using standard Schlenk techniques. All solvents were obtained anhydrous and oxygen-free by bubble degassing (argon) and purified by passing through columns of alumina and Q5.<sup>1</sup> Once collected, solvents were stored over activated 4 Å molecular sieves (20 wt%) inside the glovebox.<sup>2</sup> All glassware was oven-dried for at least 6 h prior to use, at temperatures greater than 150 °C. Deuterated solvents were purchased from Cambridge Isotope Labs and were degassed three times by the freeze-pump-thaw method and stored over activated 4 Å molecular sieves for 48 h in the glovebox prior to use. 4 Å molecular sieves (Millipore-Sigma) were dried by heating at 200 °C under dynamic vacuum for at least 48 h prior to use.

Cp<sub>2</sub>Zr(C<sub>4</sub>Me<sub>4</sub>),<sup>3</sup> (PhB(C<sub>4</sub>Me<sub>4</sub>))<sub>2</sub>,<sup>4</sup> EtCAAC,<sup>5, 6</sup> CyCAAC,<sup>5, 6</sup> and IMes,<sup>7</sup> were prepared according to literature procedures. 2-Butyne was purchased from Millipore-Sigma and degassed by the freeze-pump-thaw method and stored over activated 4 Å molecular sieves for 48 h in the glovebox prior to use. Bis(triphenylphosphine)iminium chloride ([PPN]Cl) and tetramethylammonium fluoride ([TMA]F) were purchased from Millipore-Sigma and dried by heating at 120 °C under a dynamic vacuum for at least 6 h prior to use. Unless otherwise noted, all other chemicals were purchased commercially and used as received.

NMR spectra were obtained on Bruker Avance 400, Avance 401, Neo 402, Neo 500, and Neo 501 spectrometers. <sup>1</sup>H and <sup>13</sup>C NMR spectra were referenced to residual CD<sub>2</sub>Cl<sub>2</sub> (<sup>1</sup>H = 5.32 ppm, <sup>13</sup>C = 54.0 ppm) or C<sub>6</sub>D<sub>6</sub> (<sup>1</sup>H = 7.16 ppm, <sup>13</sup>C = 128.06 ppm). HRMS were obtained on high-resolution JEOL AccuTOF 4G LC-plus equipped with an ionSense DART (Direct Analysis in Real Time) source. Elemental analyses were obtained on Thermo Scientific™ FlashSmart™ Elemental Analyzers. Samples were removed from the glovebox in sealed vials and briefly handled in air prior to data collection.

**Synthesis of 1<sup>Cl</sup>:** to a pentane (250 mL) suspension of Cp<sub>2</sub>Zr(C<sub>4</sub>Me<sub>4</sub>) (10.0 g, 30.3 mmol, 1 equiv), BCl<sub>3</sub> (1M in hexanes, 32 mL, 32 mmol, 1.06 equiv) was added dropwise at 25 °C. The color of the suspension immediately changed from red to brown. The suspension was stirred overnight at 25 °C and then filtered. The filtrate was concentrated to approx. 15 mL to obtain a dark brown solution. The solution was cooled at -35 °C and the product precipitated as brown crystalline solids (4.3 g, 92%).

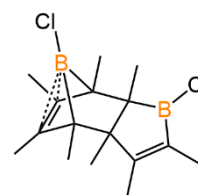

**<sup>1</sup>H NMR** (500 MHz, C<sub>6</sub>D<sub>6</sub>): 0.94 (s, 3H, CH<sub>3</sub>), 1.00 (s, 3H, CH<sub>3</sub>), 1.18 (s, 3H, CH<sub>3</sub>), 1.28 (s, 3H, CH<sub>3</sub>), 1.39 (s, 3H, CH<sub>3</sub>), 1.45 (s, 3H, CH<sub>3</sub>), 1.50 (s, 3H, CH<sub>3</sub>), 1.54 (s, 3H, CH<sub>3</sub>). **<sup>11</sup>B NMR** (161 MHz, C<sub>6</sub>D<sub>6</sub>): 3.38 (s, B-C(CH<sub>3</sub>)-C(CH<sub>3</sub>)=C), 66.23 (br. s, B-C(CH<sub>3</sub>)=C(CH<sub>3</sub>)-C). **<sup>13</sup>C{<sup>1</sup>H} NMR** (126 MHz, C<sub>6</sub>D<sub>6</sub>): 11.23 (s, CH<sub>3</sub>), 11.44 (s, CH<sub>3</sub>), 11.75 (s, CH<sub>3</sub>), 11.98 (s, CH<sub>3</sub>), 14.99 (s, CH<sub>3</sub>), 15.13 (s, CH<sub>3</sub>), 18.08 (s, CH<sub>3</sub>), 52.34 (br. s, B-C-CH<sub>3</sub>), 53.10 (br. s,

B-C-CH<sub>3</sub>), 66.48 (s, B-C(CH<sub>3</sub>)=C(CH<sub>3</sub>)-C), 129.49 (s, B-C(CH<sub>3</sub>)-C(CH<sub>3</sub>)=C), 132.20 (s, B-C(CH<sub>3</sub>)-C(CH<sub>3</sub>)=C), 183.62 (s, B-C(CH<sub>3</sub>)=C(CH<sub>3</sub>)-C). **HRMS** (m/z): [M+H]<sup>+</sup> calcd. for C<sub>16</sub>H<sub>25</sub>B<sub>2</sub>Cl<sub>2</sub>, 309.15194; found 309.15171. **Elemental analysis**: calcd. for C<sub>16</sub>H<sub>24</sub>B<sub>2</sub>Cl<sub>2</sub>, C, 62.22; H, 7.83; found: C, 61.73; H, 7.89.

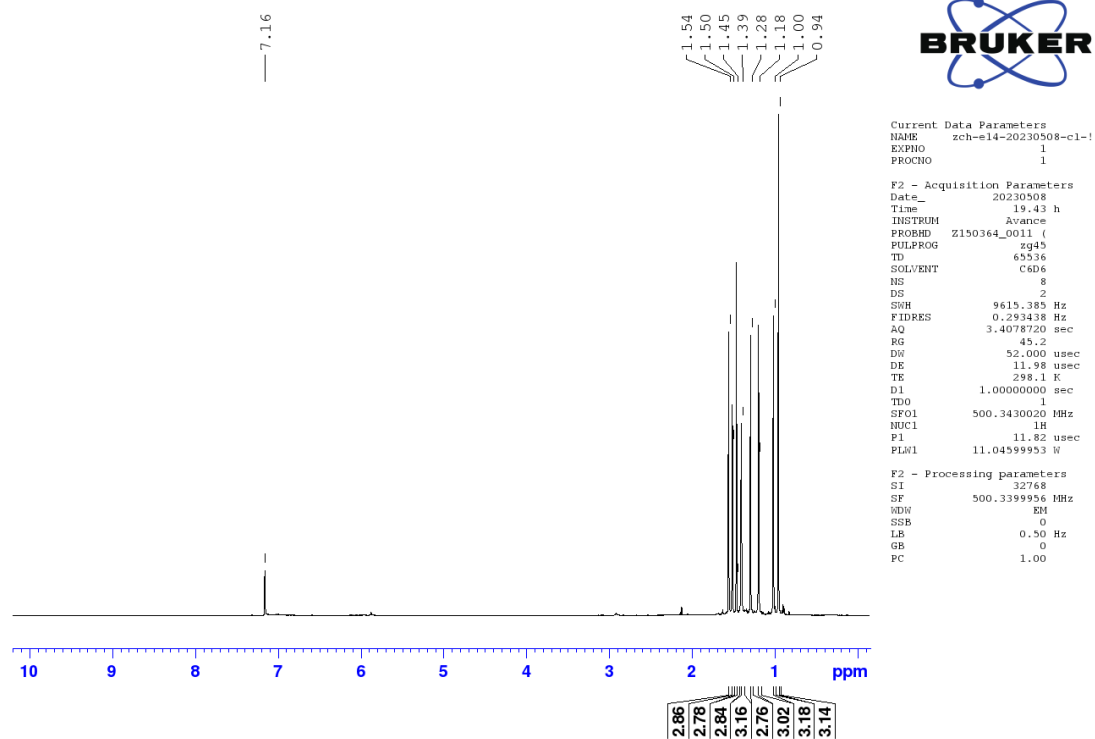

Figure S1. <sup>1</sup>H NMR spectrum of 1<sup>Cl</sup> in C<sub>6</sub>D<sub>6</sub>

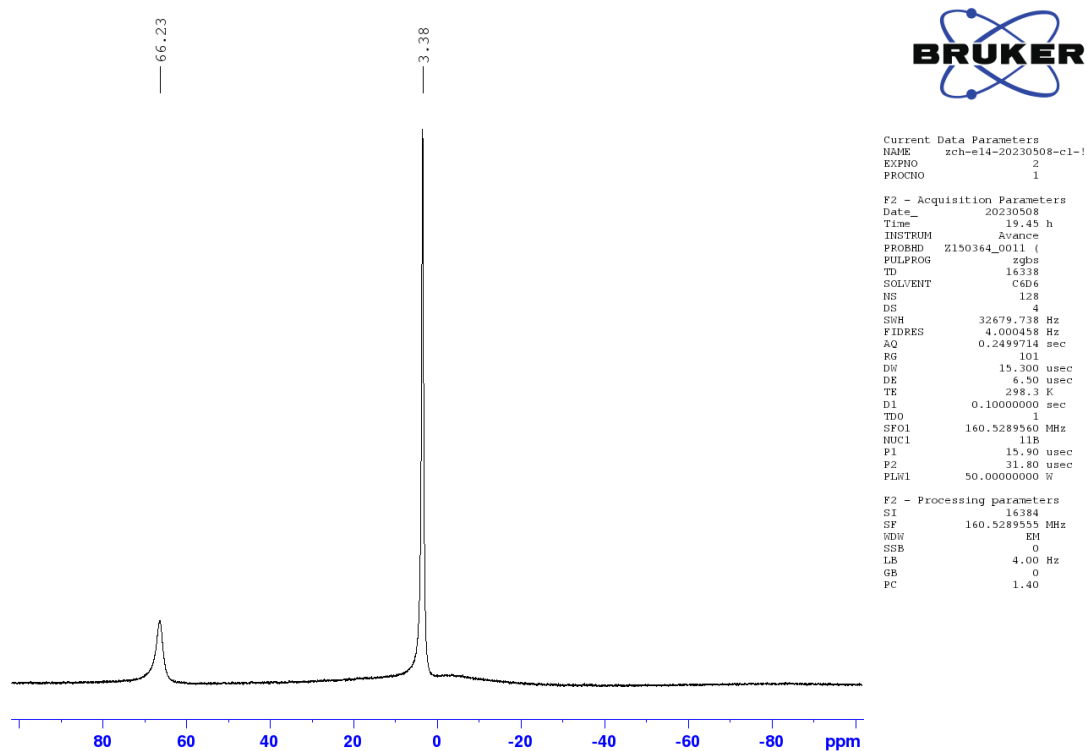

Figure S2. <sup>11</sup>B NMR spectrum of 1<sup>Cl</sup> in C<sub>6</sub>D<sub>6</sub>

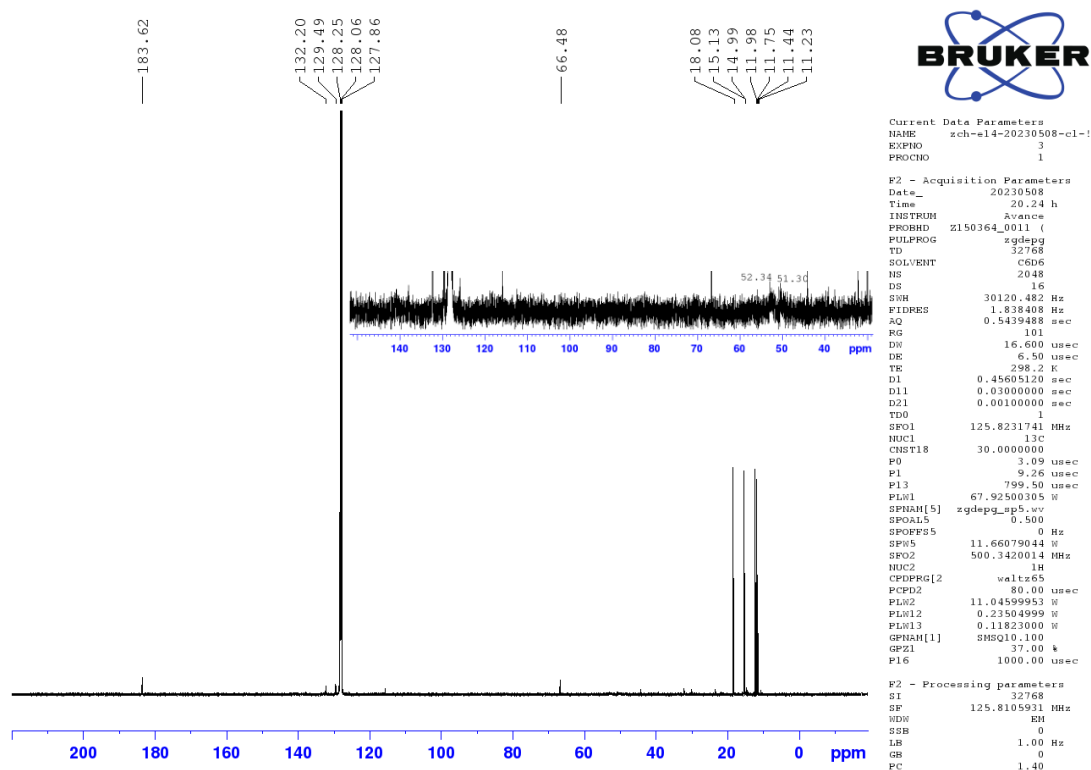

Figure S3.  $^{13}\text{C}\{^1\text{H}\}$  NMR spectrum of  $1^{\text{Cl}}$  in  $\text{C}_6\text{D}_6$

**Synthesis of  $1^{\text{Br}}$ :** to a pentane (100 mL) suspension of  $\text{Cp}_2\text{Zr}(\text{C}_4\text{Me}_4)$  (1.71 g, 5.2 mmol, 1.0 equiv),  $\text{BBr}_3$  (1.37 g, 5.46 mmol, 1.05 equiv) was added dropwise at 25 °C. The color of the suspension immediately changed from red to light brown. The suspension was stirred overnight at 25 °C and then filtered. All volatiles in the red-brown filtrate were removed under reduced pressure to obtain a brown solid (872 mg, 84%). The purity of the crude product was acceptable based on the NMR spectra.

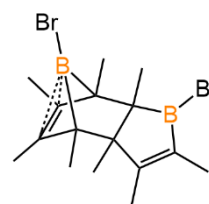

$^1\text{H}$  NMR (500 MHz,  $\text{C}_6\text{D}_6$ ): 0.93 (s, 3H,  $\text{CH}_3$ ), 1.02 (s, 3H,  $\text{CH}_3$ ), 1.17 (s, 3H,  $\text{CH}_3$ ), 1.25 (s, 3H,  $\text{CH}_3$ ), 1.42 (s, 3H,  $\text{CH}_3$ ), 1.43 (s, 3H,  $\text{CH}_3$ ), 1.44 (s, 3H,  $\text{CH}_3$ ), 1.59 (s, 3H,  $\text{CH}_3$ );  $^{11}\text{B}$  NMR (161 MHz,  $\text{C}_6\text{D}_6$ ): -3.90 (s,  $\text{B}-\text{C}(\text{CH}_3)-\text{C}(\text{CH}_3)=\text{C}$ ), 67.62 (br. s,  $\text{B}-\text{C}(\text{CH}_3)=\text{C}(\text{CH}_3)-\text{C}$ );  $^{13}\text{C}\{^1\text{H}\}$  NMR (126 MHz,  $\text{C}_6\text{D}_6$ ): 11.96 (s,  $\text{CH}_3$ ), 12.12 (s,  $\text{CH}_3$ ), 12.37 (s,  $\text{CH}_3$ ), 12.57 (s,  $\text{CH}_3$ ), 12.84 (s,  $\text{CH}_3$ ), 15.32 (s,  $\text{CH}_3$ ), 15.45 (s,  $\text{CH}_3$ ), 18.20 (s,  $\text{CH}_3$ ), 51.25 (br. s,  $\text{B}-\text{C}-\text{CH}_3$ ), 54.36 (br. s,  $\text{B}-\text{C}-\text{CH}_3$ ), 68.02 (s,  $\text{B}-\text{C}(\text{CH}_3)=\text{C}(\text{CH}_3)-\text{C}$ ), 130.85 (s,  $\text{B}-\text{C}(\text{CH}_3)-\text{C}(\text{CH}_3)=\text{C}$ ), 142.47 (br. s,  $\text{B}-\text{C}-\text{CH}_3$ ), 183.99 (s,  $\text{B}-\text{C}(\text{CH}_3)=\text{C}(\text{CH}_3)-\text{C}$ ). HRMS (m/z):  $[\text{M}+\text{H}]^+$  calcd. for  $\text{C}_{16}\text{H}_{25}\text{B}_2\text{Br}_2$ , 397.05091; found 397.05166. **Elemental analysis:** calcd. for  $\text{C}_{16}\text{H}_{24}\text{B}_2\text{Br}_2$ , C, 48.31; H, 6.08; found: C, 48.11; H, 5.95.

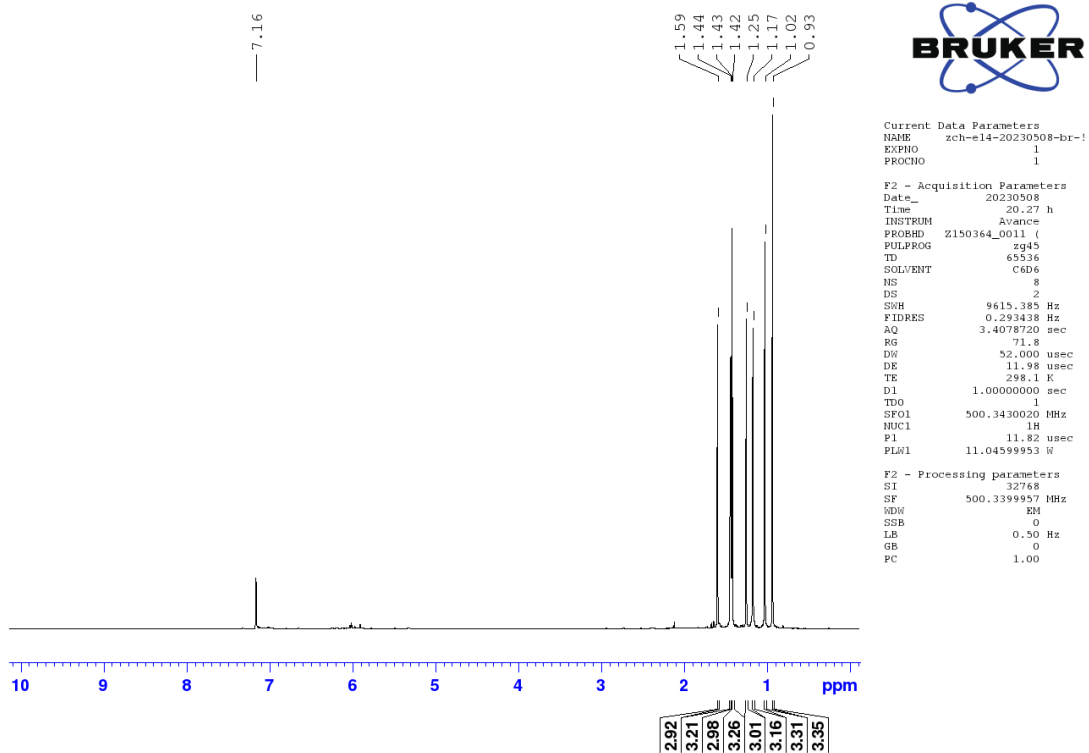

Figure S4.  $^1\text{H}$  NMR spectrum of  $1^{\text{Br}}$  in  $\text{C}_6\text{D}_6$

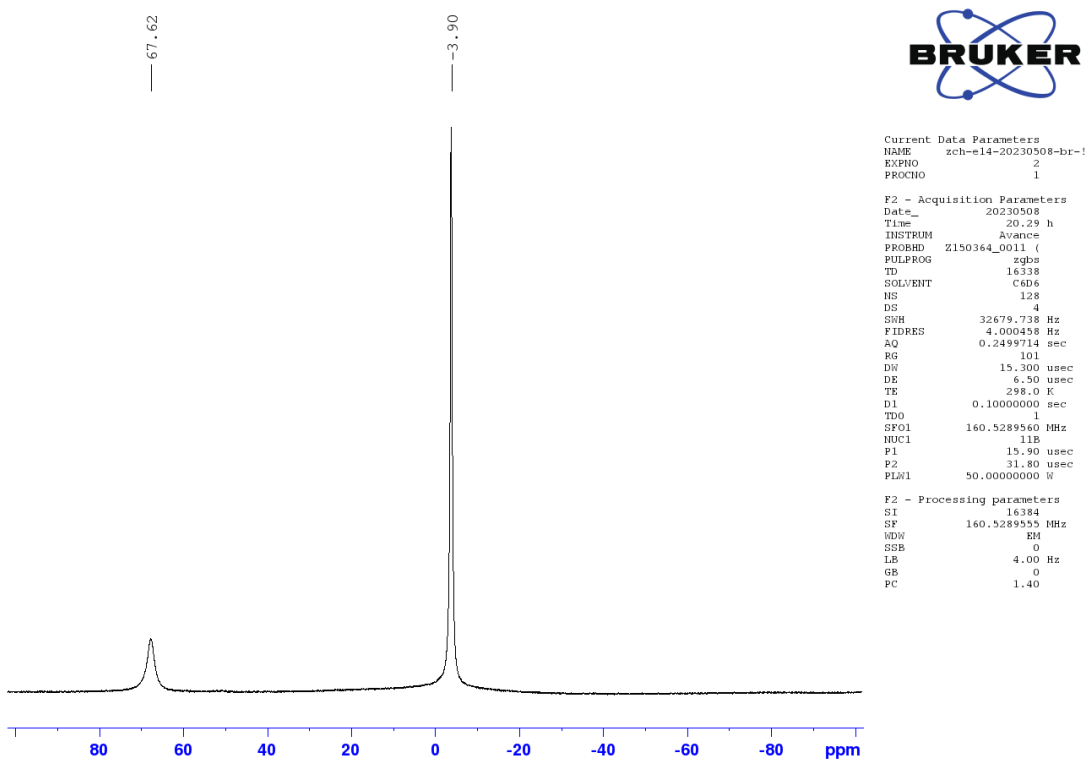

Figure S5.  $^{11}\text{B}$  NMR spectrum of  $1^{\text{Br}}$  in  $\text{C}_6\text{D}_6$

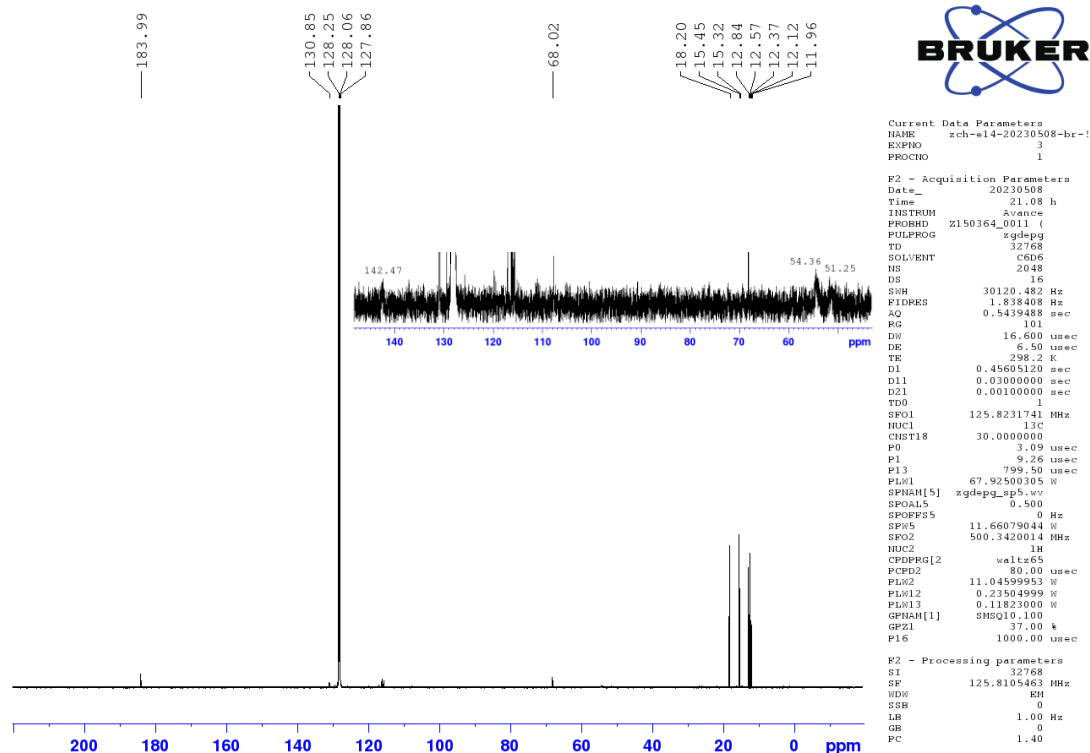

Figure S6.  $^{13}\text{C}\{^1\text{H}\}$  NMR spectrum of  $1^{\text{Br}}$  in  $\text{C}_6\text{D}_6$

**Synthesis of  $2^{\text{Cl}}$ :** inside the glovebox, compound  $1^{\text{Cl}}$  (730 mg, 2.36 mmol, 1.0 equiv) and 2-butyne (510 mg, 9.44 mmol, 4.0 equiv) were dissolved in toluene (7 mL) in a Schlenk flask. The flask was taken out of the glovebox and heated at 55 °C overnight to obtain an orange solution. The flask was then connected to a dynamic vacuum for approx. 10 mins to remove the remaining 2-butyne. The solution was heated at 70 °C for another 6 hours. All volatiles in the solution were removed under vacuum to obtain an orange oil (980 mg, 99%). The purity of the crude product was acceptable based on the NMR spectra.

$^1\text{H}$  NMR (500 MHz,  $\text{C}_6\text{D}_6$ ): 1.41 (s, 6H,  $\text{CH}_3$ ), 1.52 (s, 12H,  $\text{CH}_3$ );  $^{11}\text{B}$  NMR (161 MHz,  $\text{C}_6\text{D}_6$ ): -7.50 (s);  $^{13}\text{C}\{^1\text{H}\}$  NMR (126 MHz,  $\text{C}_6\text{D}_6$ ): 11.11 (s,  $\text{C-CH}_3$ ), 11.64 (s,  $\text{C-CH}_3$ ), 60.11 (br. s,  $\text{B-C-CH}_3$ ), 126.95 (s,  $\text{C=C}$ ). HRMS (m/z):  $[\text{M}+\text{H}]^+$  calcd. for  $\text{C}_{12}\text{H}_{19}\text{BCl}$ , 209.12683; found 209.12579. Elemental analysis: calcd. for  $\text{C}_{12}\text{H}_{18}\text{BCl}$ , C, 69.12; H, 8.70; found: C, 69.42; H, 8.75.

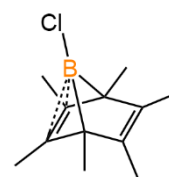

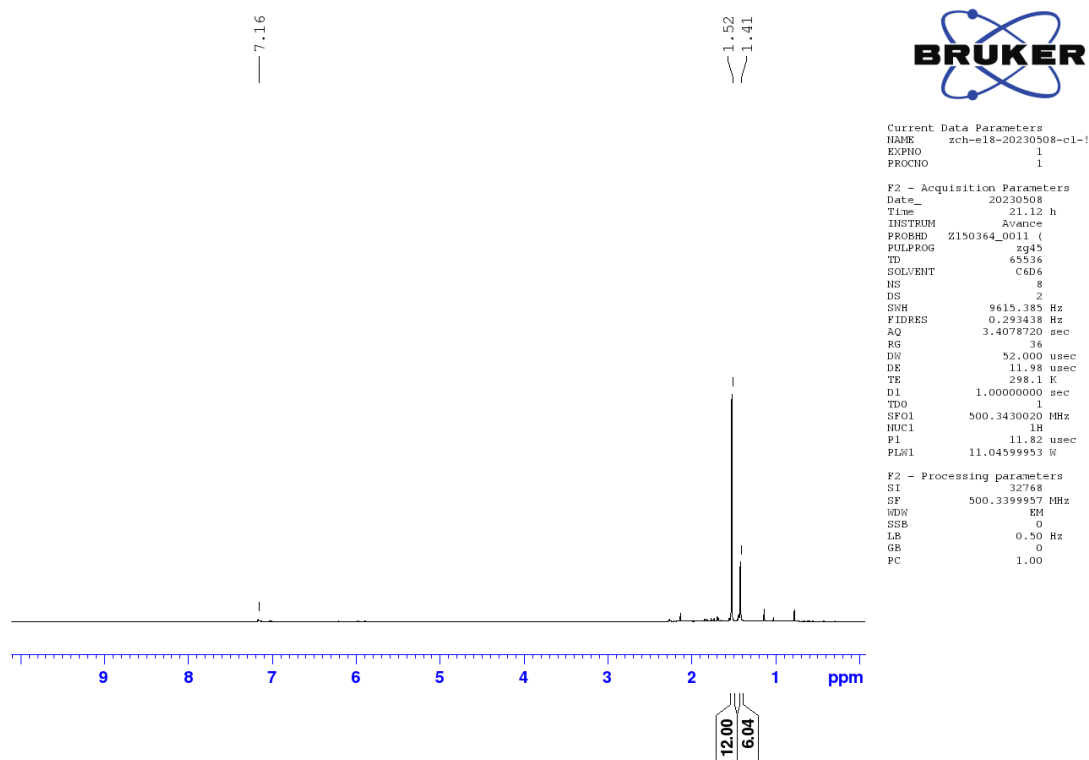

Figure S7.  $^1\text{H}$  NMR spectrum of  $2^{\text{Cl}}$  in  $\text{C}_6\text{D}_6$

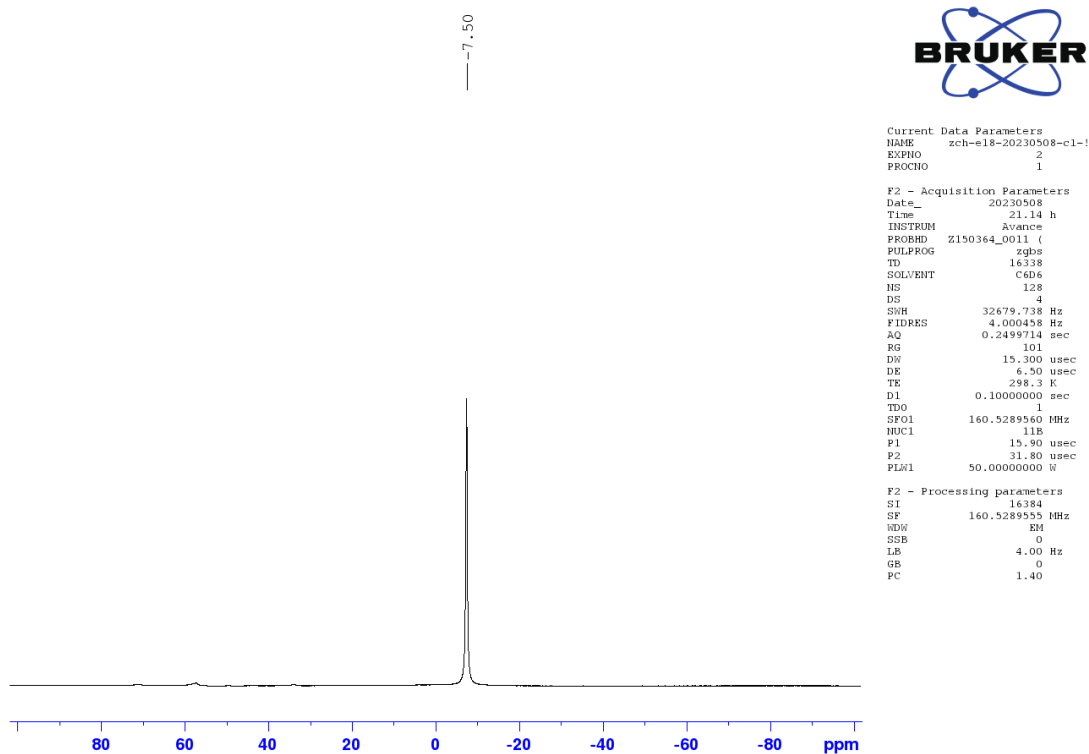

Figure S8.  $^{11}\text{B}$  NMR spectrum of  $2^{\text{Cl}}$  in  $\text{C}_6\text{D}_6$

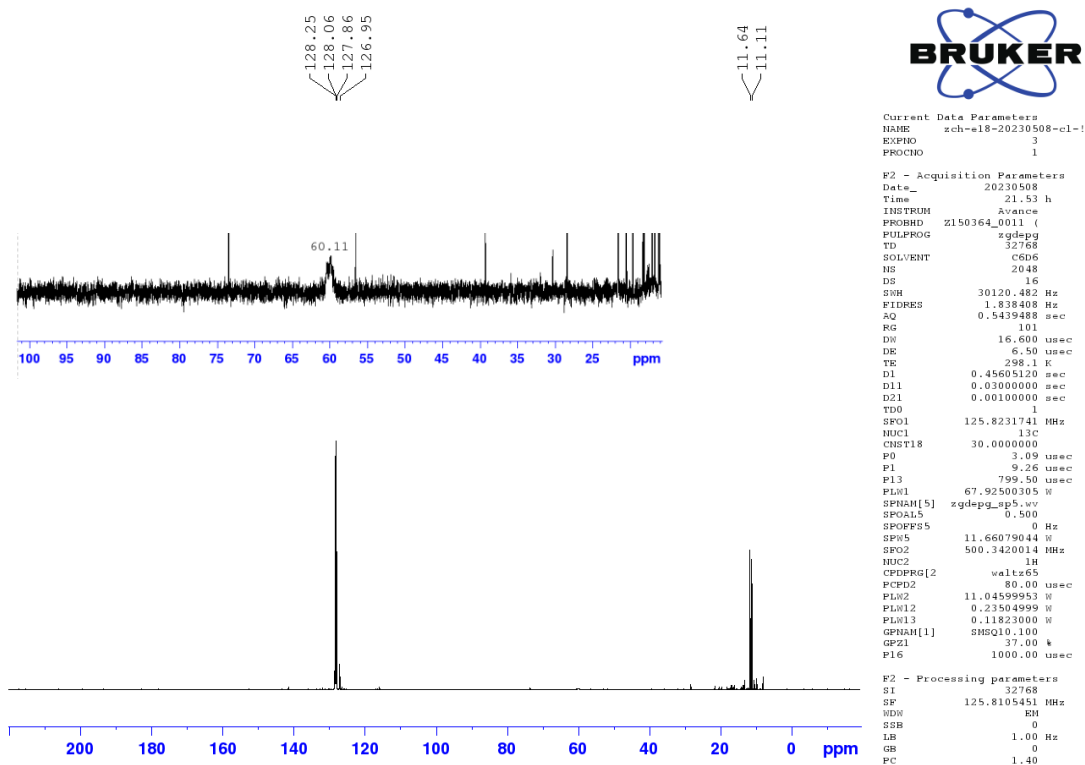

Figure S9.  $^{13}\text{C}\{^1\text{H}\}$  NMR spectrum of  $2^{\text{Cl}}$  in  $\text{C}_6\text{D}_6$

**Synthesis of  $2^{\text{Br}}$ :** inside the glovebox, compound  $1^{\text{Br}}$  (730 mg, 1.83 mmol, 1.0 equiv) and 2-butyne (395 mg, 7.32 mmol, 4.0 equiv) were dissolved in toluene (11 mL) in a Schlenk flask. The flask was taken out of the glovebox and heated at 60 °C for one day to obtain an orange solution. All volatiles in the solution were removed under vacuum to obtain an orange oil (907 mg, 98%). The purity of the crude product was acceptable based on the NMR spectra.

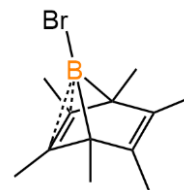

$^1\text{H}$  NMR (500 MHz,  $\text{C}_6\text{D}_6$ ): 1.40 (s, 6H,  $\text{CH}_3$ ), 1.50 (s, 12H,  $\text{CH}_3$ );  $^{11}\text{B}$  NMR (161 MHz,  $\text{C}_6\text{D}_6$ ): -11.30 (s);  $^{13}\text{C}\{^1\text{H}\}$  NMR (126 MHz,  $\text{C}_6\text{D}_6$ ): 11.84 (s,  $\text{C-CH}_3$ ), 11.99 (s,  $\text{C-CH}_3$ ), 60.77 (br. s,  $\text{B-C-CH}_3$ ), 126.44 (s,  $\text{C=C}$ ). **HRMS** (m/z): not detected. **Elemental analysis:** calcd. for  $\text{C}_{12}\text{H}_{18}\text{BBr}$ , C, 56.97; H, 7.17; found: C, 56.33; H, 7.13.



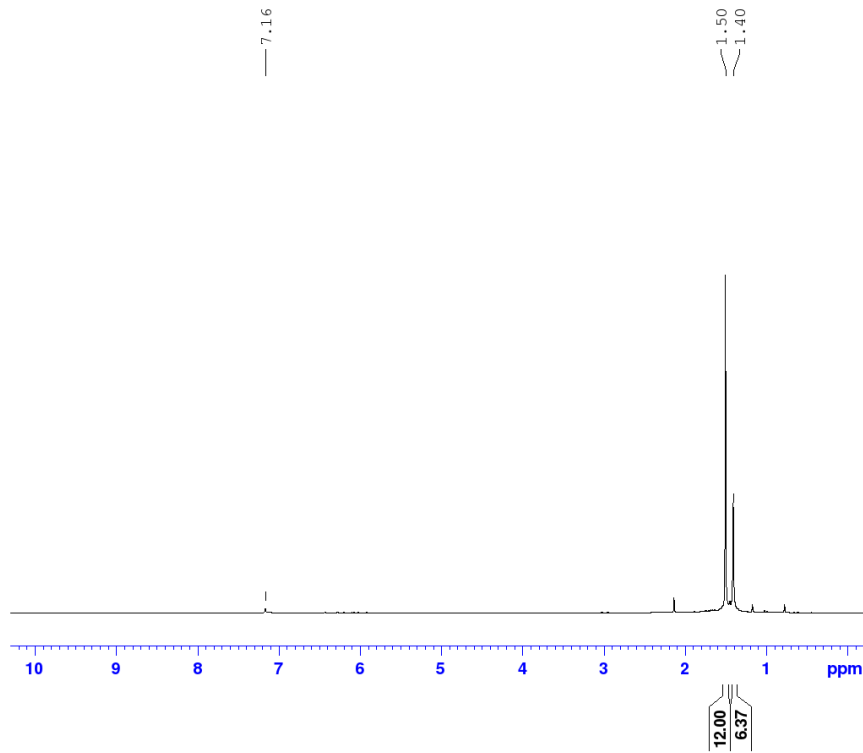

Current Data Parameters  
 NAME zch-e18-20230617-br-1  
 EXPNO 1  
 PROCNO 1

F2 - Acquisition Parameters  
 Date\_ 20230617  
 Time 18.39 h  
 INSTRUM spect  
 PROBHD Z149000\_0036 (4  
 PULPROG zgpg30  
 TD 65536  
 SOLVENT C6D6  
 NS 8  
 DS 2  
 SWH 7692.308 Hz  
 FIDRES 0.234751 Hz  
 AQ 4.2598400 sec  
 RG 45.2  
 DW 65.000 usec  
 DE 21.16 usec  
 TE 298.2 K  
 D1 1.0000000 sec  
 TDO 1  
 SFO1 400.0604003 MHz  
 NUC1 1H  
 P1 11.67 usec  
 PLW1 8.79100037 W

F2 - Processing parameters  
 SI 32768  
 SF 400.0579968 MHz  
 WDW EM  
 SSB 0  
 LB 0.50 Hz  
 GB 0  
 PC 1.00

Figure S10.  $^1\text{H}$  NMR spectrum of  $2^{\text{Br}}$  in  $\text{C}_6\text{D}_6$

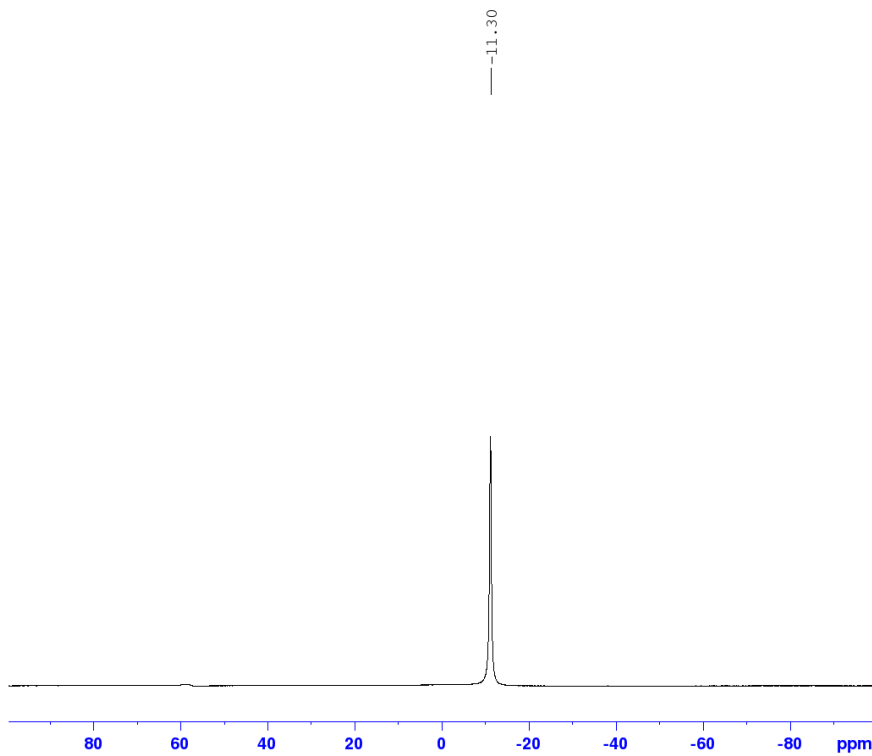

Current Data Parameters  
 NAME zch-e18-20230617-br-1  
 EXPNO 2  
 PROCNO 1

F2 - Acquisition Parameters  
 Date\_ 20230617  
 Time 18.42 h  
 INSTRUM spect  
 PROBHD Z149000\_0036 (4  
 PULPROG zgpg30  
 TD 12752  
 SOLVENT C6D6  
 NS 128  
 DS 4  
 SWH 25510.203 Hz  
 FIDRES 4.000973 Hz  
 AQ 0.2499392 sec  
 RG 203  
 DW 19.600 usec  
 DE 18.00 usec  
 TE 298.2 K  
 D1 0.1000000 sec  
 TDO 1  
 SFO1 128.3545047 MHz  
 NUC1 11B  
 P1 13.00 usec  
 P2 26.00 usec  
 PLW1 39.99399948 W

F2 - Processing parameters  
 SI 16384  
 SF 128.3545047 MHz  
 WDW EM  
 SSB 0  
 LB 4.00 Hz  
 GB 0  
 PC 1.40

Figure S11.  $^{11}\text{B}$  NMR spectrum of  $2^{\text{Br}}$  in  $\text{C}_6\text{D}_6$

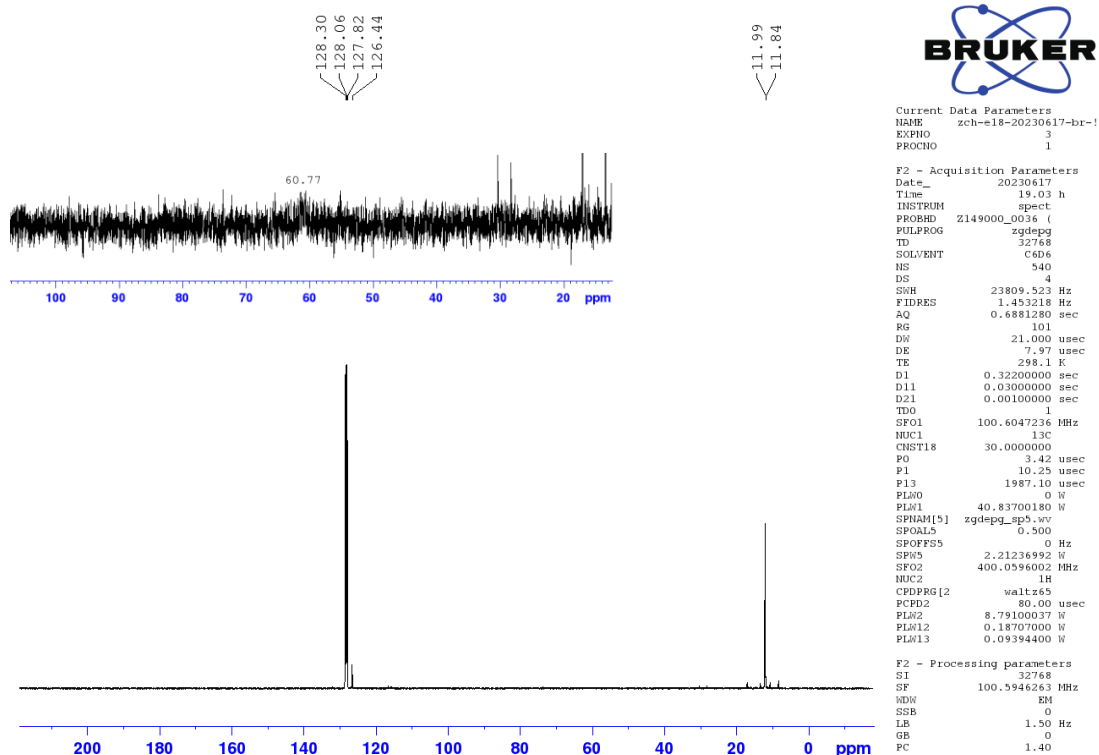

Figure S12.  $^{13}\text{C}\{^1\text{H}\}$  NMR spectrum of  $2^{\text{Br}}$  in  $\text{C}_6\text{D}_6$

**Synthesis of  $2^{\text{Ph}}$ :** inside the glovebox, compound  $1^{\text{Ph}}$  (600 mg, 1.53 mmol, 1.0 equiv) and 2-butyne (331 mg, 6.12 mmol, 4.0 equiv) were dissolved in toluene (20 mL) in a Schlenk flask. The flask was taken out of the glovebox and heated at 60 °C for one day to obtain a light brown solution. All volatiles in the solution were removed under vacuum to obtain an off-white solid. The solid was washed with hexanes (5 mL) and dried under vacuum to obtain the final product. A second crop of the product, a crystalline solid, was obtained by cooling the remaining hexanes solution at -35 °C (combined yield: 635 mg, 83%). The NMR spectra were in accordance with those in literature.<sup>4</sup>

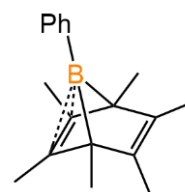

**Synthesis of 6:** in a vial, a toluene (5 mL) solution of 1,3-bis(2,4,6-trimethylphenyl)imidazol-2-ylidene (*i*Mes) (182 mg, 0.60 mmol, 1.0 equiv) was slowly added to a toluene (1 mL) solution of  $2^{\text{Cl}}$  (125 mg, 0.60 mmol, 1.0 equiv). The solution was left to stand still overnight, and colorless crystalline solids gradually precipitated. The mother liquid was removed, and the remaining solids were dissolved in DCM (0.5 mL). Hexanes (0.5 mL) was slowly added to the DCM solution. The solution was then cooled at -35°C overnight to obtain colorless crystalline solids (67%, 206 mg).

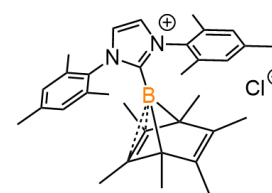

$^1\text{H}$  NMR (500 MHz, DCM): 0.95 (s, 6H, B-C- $\text{CH}_3$ ), 1.35 (s, 12H, B-C( $\text{CH}_3$ )-C( $\text{CH}_3$ )), 2.05 (s, 12H,  $\text{C}^{\text{Mes}}\text{H}_3$ ), 2.39 (s, 6H,  $\text{C}^{\text{Mes}}\text{H}_3$ ), 7.10 (s, 4H,  $\text{C}^{\text{Mes}}\text{H}$ ), 7.80 (s, 2H, N- $\text{CH}$ );  $^{11}\text{B}$  NMR (161 MHz, DCM): -16.44 (s);  $^{13}\text{C}\{^1\text{H}\}$  NMR (126 MHz, DCM): 11.78 (s,  $\text{C}^{\text{norbomadiene}}\text{CH}_3$ ), 12.98 (s,  $\text{C}^{\text{norbomadiene}}\text{CH}_3$ ), 18.43 (s, *o*- $\text{C}^{\text{Mes}}\text{CH}_3$ ), 21.22 (s, *p*- $\text{C}^{\text{Mes}}\text{CH}_3$ ), 59.86 (br. s, B-

$\underline{C}(\text{CH}_3)$ , 124.38 (s, *p*- $\underline{C}^{\text{Mes}}\text{CH}_3$ ), 126.35 (br. s,  $\text{B}-\underline{C}(\text{CH}_3)-\underline{C}(\text{CH}_3)$ ), 127.54 (s,  $\text{N}-\underline{\text{C}}\text{H}$ ), 130.29 (s,  $\underline{C}^{\text{Mes}}\text{H}$ ), 135.17 (s, *m*- $\underline{C}^{\text{Mes}}\text{CH}_3$ ), 141.80 (s, *o*- $\underline{C}^{\text{Mes}}\text{CH}_3$ ). **HRMS** (*m/z*):  $[\text{M}]^+$  calcd. for  $\text{C}_{33}\text{H}_{42}\text{BN}_2$ , 477.34410; found 477.34156. **Elemental analysis**: calc. for  $\text{C}_{33}\text{H}_{42}\text{BN}_2\text{Cl}$  + 1.1 DCM, C, 67.54; H, 7.35; N, 4.62; found: C, 67.66; H, 7.40; N, 4.70.

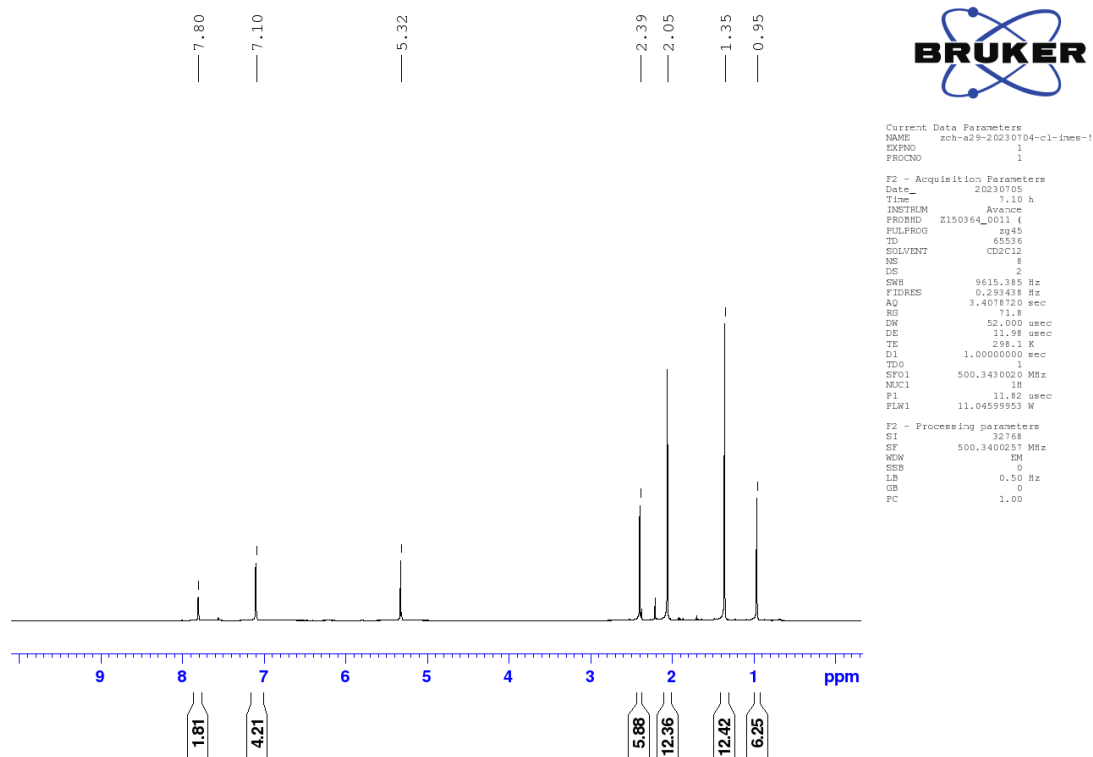

Figure S13.  $^1\text{H}$  NMR spectrum of **6** in  $d_2$ -DCM.

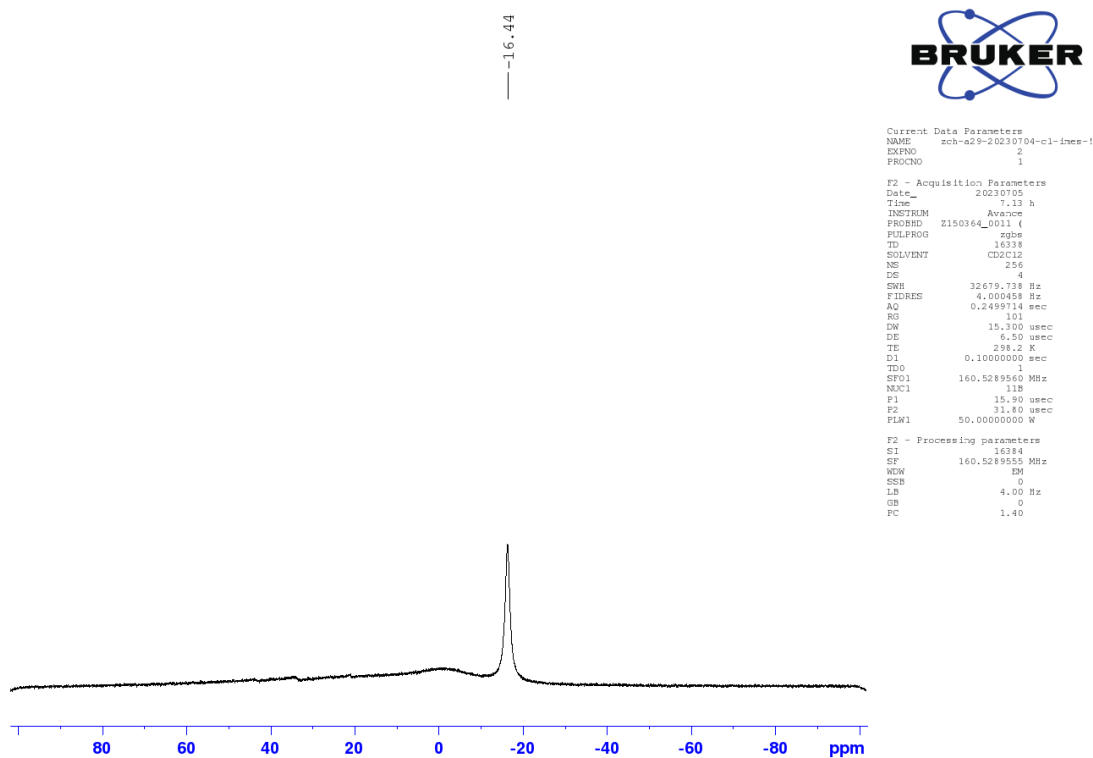

Figure S14.  $^{11}\text{B}$  NMR spectrum of **6** in  $d_2$ -DCM.

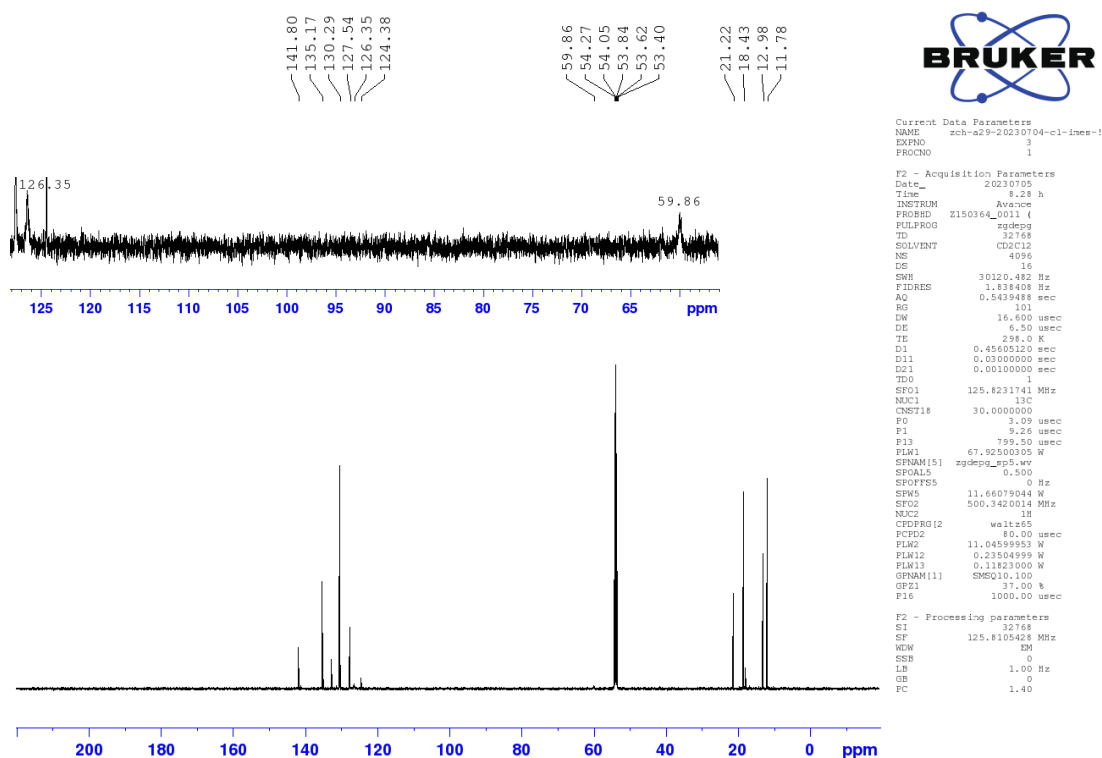

Figure S15.  $^{13}\text{C}\{^1\text{H}\}$  NMR spectrum of **6** in  $d_2$ -DCM.

**Synthesis of 7:** in a vial, a toluene (10 mL) solution of cyclic(alkyl)(amino) carbene  $\text{CyCAAC}$  (604 mg, 1.85 mmol, 1.0 equiv) was slowly added to a toluene (1 mL) solution of **2**<sup>Br</sup> (468 mg, 1.85 mmol, 1.0 equiv). The solution was left to stand still overnight, and yellowish crystalline solids precipitated. The solids were separated from mother liquid by filtration. The solids were washed with toluene (2 mL) and dried under vacuum to afford the final product (56%, 601 mg).

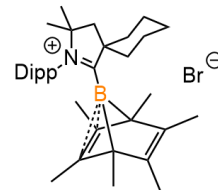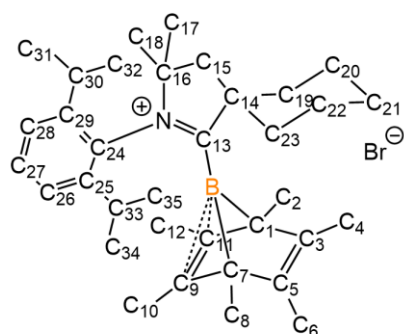

**$^1\text{H}$  NMR** (500 MHz, DCM): 1.00 (s, 6H,  $\text{C}_2\text{H}_3$  and  $\text{C}_8\text{H}_3$ ), 1.23 (d,  $J = 6.6$ , 6H,  $\text{C}_{32}\text{H}_3$  and  $\text{C}_{35}\text{H}_3$ , or  $\text{C}_{31}\text{H}_3$  and  $\text{C}_{34}\text{H}_3$ ), 1.32 (m, 1H,  $\text{C}_{21}\text{H}$ ), 1.35 (d,  $J = 6.6$ , 6H,  $\text{C}_{32}\text{H}_3$  and  $\text{C}_{35}\text{H}_3$ , or  $\text{C}_{31}\text{H}_3$  and  $\text{C}_{34}\text{H}_3$ ), 1.35 (br. s, 6H,  $\text{C}_4\text{H}_3$  and  $\text{C}_6\text{H}_3$ , or  $\text{C}_{10}\text{H}_3$  and  $\text{C}_{12}\text{H}_3$ ), 1.51 (m, 2H,  $\text{C}_{20}\text{H}$  and  $\text{C}_{22}\text{H}$ ), 1.58 (s, 6H,  $\text{C}_{17}\text{H}_2$  and  $\text{C}_{18}\text{H}_2$ ), 1.59 (m, 4H,  $\text{C}_{19}\text{H}_2$  and  $\text{C}_{23}\text{H}_2$ ), 1.86 (m, 1H,  $\text{C}_{21}\text{H}$ ), 1.91 (m, 2H,  $\text{C}_{20}\text{H}$  and  $\text{C}_{22}\text{H}$ ), 2.07 (br. s, 6H,  $\text{C}_4\text{H}_3$  and  $\text{C}_6\text{H}_3$ , or  $\text{C}_{10}\text{H}_3$  and  $\text{C}_{12}\text{H}_3$ ), 2.34 (s, 2H,  $\text{C}_{15}\text{H}_2$ ), 2.54 (sept,  $J = 6.6$ , 2H,  $\text{C}_{30}\text{H}$  and  $\text{C}_{33}\text{H}$ ), 7.35 (d,  $J = 7.8$ , 2H,  $\text{C}_{26}\text{H}$  and  $\text{C}_{28}\text{H}$ ), 7.53 (t,  $J = 7.8$ , 1H,  $\text{C}_{27}$ );  **$^{11}\text{B}$  NMR** (161 MHz, DCM):  $-13.27$  (s);  **$^{13}\text{C}\{^1\text{H}\}$  NMR** (126

MHz, DCM): 12.60 (br. s, C<sub>10</sub> and C<sub>12</sub>, or C<sub>4</sub> and C<sub>6</sub>), 12.96 (s, C<sub>2</sub> and C<sub>8</sub>), 14.11 (br. s, C<sub>10</sub> and C<sub>12</sub>, or C<sub>4</sub> and C<sub>6</sub>), 22.16 (s, C<sub>20</sub> and C<sub>22</sub>), 24.90 (s, C<sub>21</sub>), 24.14 (s, C<sub>31</sub> and C<sub>34</sub>, or C<sub>32</sub> and C<sub>35</sub>), 27.92 (s, C<sub>31</sub> and C<sub>34</sub>, or C<sub>32</sub> and C<sub>35</sub>), 29.44 (s, C<sub>30</sub> and C<sub>33</sub>), 35.60 (s, C<sub>19</sub> and C<sub>23</sub>), 35.65 (s, C<sub>17</sub> and C<sub>18</sub>), 45.21 (s, C<sub>15</sub>), 61.53 (br. s, C<sub>1</sub> and C<sub>7</sub>), 61.68 (s, C<sub>14</sub>), 84.26 (s, C<sub>16</sub>), 125.52 (br. s, C<sub>3</sub> and C<sub>5</sub>, or C<sub>9</sub> and C<sub>11</sub>), 126.42 (s, C<sub>27</sub>), 131.60 (s, C<sub>26</sub> and C<sub>28</sub>), 131.61 (br. s, C<sub>3</sub> and C<sub>5</sub>, or C<sub>9</sub> and C<sub>11</sub>), 133.84 (s, C<sub>25</sub> and C<sub>29</sub>), 145.91 (s, C<sub>24</sub>), 209.70 (only observed by HMBC, C<sub>13</sub>). (Some assignments of the peaks were accomplished by the assistance of 2D spectra) **HRMS** (m/z): [M]<sup>+</sup> calcd. for C<sub>35</sub>H<sub>53</sub>BN, 498.42710; found 498.42844. **Elemental analysis**: calcd. for C<sub>35</sub>H<sub>53</sub>BNBr, C, 72.67; H, 9.23; N, 2.42; found, C, 72.83; H, 9.14; N, 2.28.

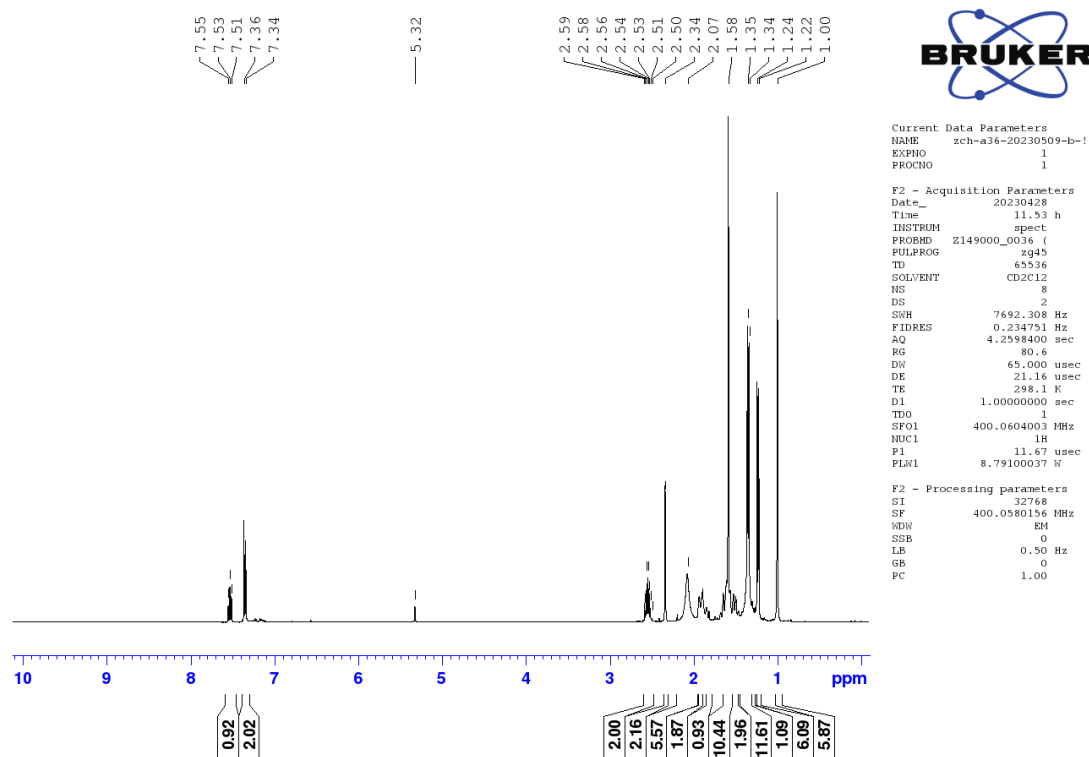

Figure S16. <sup>1</sup>H NMR spectrum of **7** in d<sub>2</sub>-DCM.

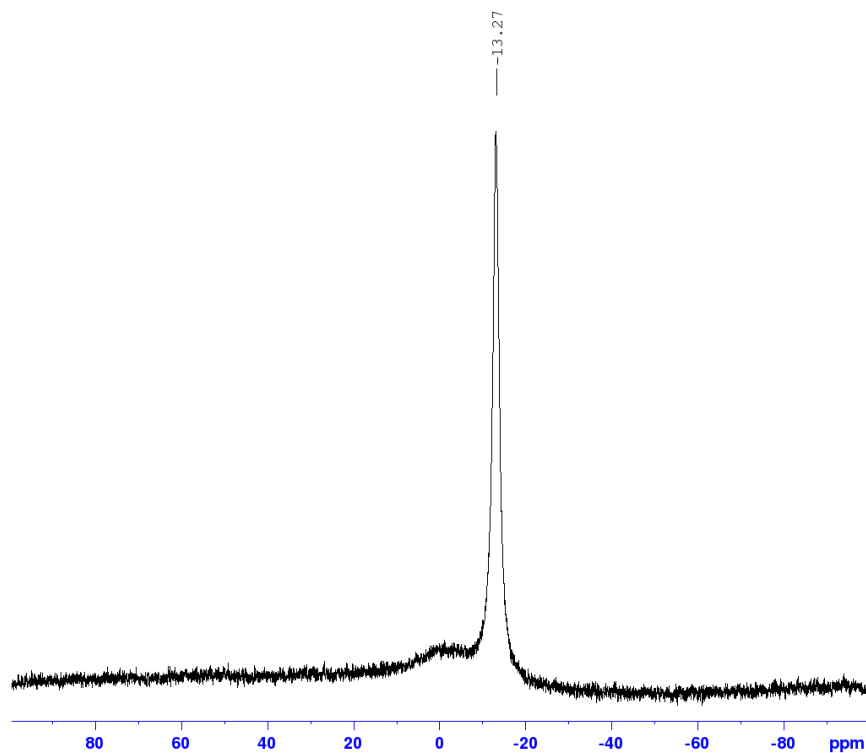

```

Current Data Parameters
NAME      zch-a36-20230509-b-1
EXPNO    2
PROCNO    1

F2 - Acquisition Parameters
Date_    20230428
Time     11.55 h
INSTRUM  spect
PROBHD   Z149000_0036 (
PULPROG  zgpg
TD        12752
SOLVENT  CD2Cl2
NS        64
DS        4
SWH       25510.203 Hz
FIDRES    4.000973 Hz
AQ        0.2499392 sec
RG         203
DW         19.600 usec
DE         18.00 usec
TE         298.2 K
D1         0.10000000 sec
TD0        1
SFO1      128.3545047 MHz
NUC1       11B
P1         13.00 usec
P2         26.00 usec
PLN1      39.99399948 N

F2 - Processing parameters
SI         16384
SF         128.3545047 MHz
WDW        EM
SSB         0
LB          4.00 Hz
GB          0
PC          1.40

```

Figure S17.  $^{11}\text{B}$  NMR spectrum of **7** in  $d_2$ -DCM.

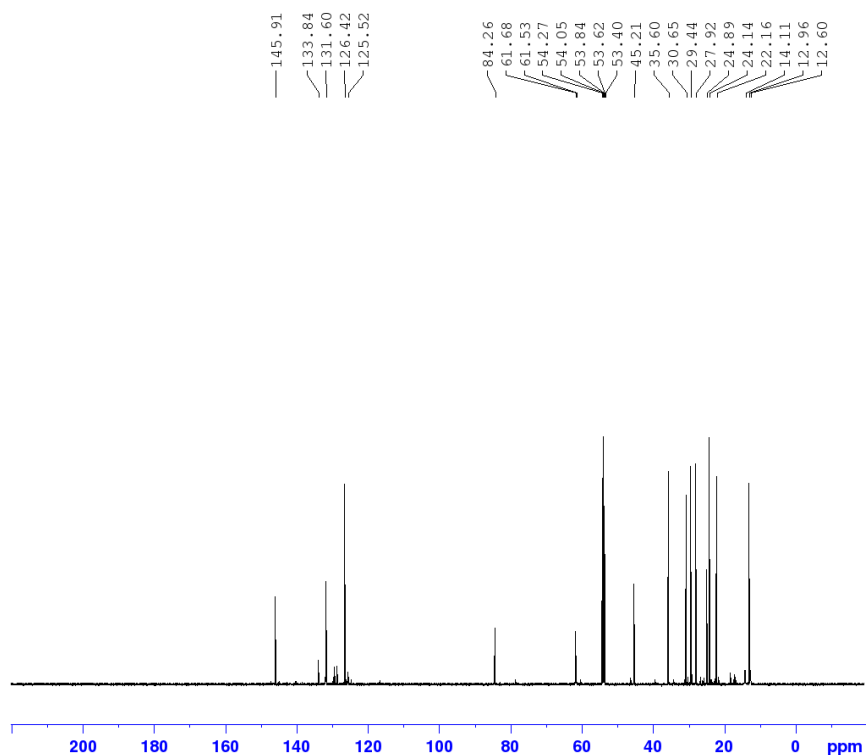

```

Current Data Parameters
NAME      zch-a36-20230509-b-1
EXPNO    3
PROCNO    1

F2 - Acquisition Parameters
Date_    20230510
Time     3.41 h
INSTRUM  Avance
PROBHD   Z150364_0011 (
PULPROG  zgpgpg
TD        32768
SOLVENT  CD2Cl2
NS        2048
DS         16
SWH       30120.482 Hz
FIDRES    1.838408 Hz
AQ        0.5439488 sec
RG         101
DW         16.600 usec
DE         6.50 usec
TE         298.1 K
D1         0.45605120 sec
D11        0.03000000 sec
D21        0.00100000 sec
TD0        1
SFO1      125.8231741 MHz
NUC1       13C
CHST18    30.0000000
P0         3.09 usec
P1         9.26 usec
P13        799.50 usec
PLN1      67.92500305 N
SPNAM[5]  zgpgpg_ap5.vv
SPOALS5    0.500
SPOFFS5    0 Hz
SPK5       11.66079044 Hz
SFO2       500.3420014 MHz
NUC2        1H
CPDPRG[2] waltz65
PCPD2      80.00 usec
PLW2       11.04599953 N
PLW12      0.23504999 N
PLW13      0.11823000 N
GPNAM[1]   SMSQ10.100
GPZ1       37.00 k
P16        1000.00 usec

F2 - Processing parameters
SI         32768
SF         125.8105466 MHz
WDW        EM
SSB         0
LB          1.00 Hz
GB          0
PC          1.40

```

Figure S18.  $^{13}\text{C}^8$  NMR spectrum of **7** in  $d_2$ -DCM.

The reaction of  $2^{\text{Cl}}$  with  $\text{Et}^{\text{CAAC}}$ : to a toluene (100 mL) solution of  $2^{\text{Cl}}$  (505 mg, 2.42 mmol, 1.0 equiv), a toluene (20 mL) solution of  $\text{Et}^{\text{CAAC}}$  (1.22 g, 2.42 mmol, 1.0 equiv) was slowly added at 25 °C while stirring. The solution immediately turned orange and then gradually

turned yellow. The solution was stirred overnight and then concentrated to approx. 20 mL. The concentrated solution was cooled at  $-35\text{ }^{\circ}\text{C}$  for approx. 20 minutes and compound **3** was precipitated as white crystalline solids (59 mg, 6.8%). After compound **3** was isolated from the mother liquid by filtration, the solution was concentrated to approx. 10 mL and stored at  $-35\text{ }^{\circ}\text{C}$  for 2 days. Compound **3**, **4**, and hexamethylbenzene precipitated as a mixture. The mother liquid was removed and the remaining solids were washed with hexanes (10 mL $\times$ 2) and dried to afford compound **3** and **4** as a ratio of 1:1.4 (172 mg in total).

**NMR yield determination:** to a toluene (1 mL) solution of **2**<sup>Cl</sup> (10.4 mg, 0.05 mmol, 1.0 equiv), a toluene (1 mL) solution of <sup>Et</sup>CAAC (15.7 mg, 0.05 mmol, 1.0 equiv) was slowly added at  $25\text{ }^{\circ}\text{C}$  while stirring. The solution was stirred overnight. Acenaphthene (7.7 mg, 0.05 mmol, 1.0 equiv) was then added to the solution as an internal reference. All volatiles in the solution were removed under vacuum and the remaining solids were dissolved in deuterated DCM. The <sup>1</sup>H NMR spectrum suggested that the yield of **3**, **4** and C<sub>6</sub>Me<sub>6</sub> were 37%, 24%, and 64%, respectively.

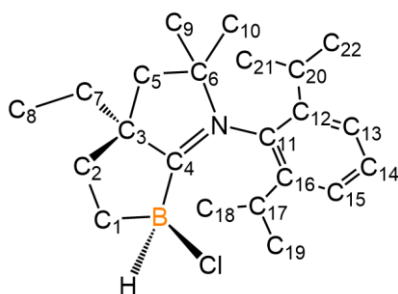

**<sup>1</sup>H NMR** (500 MHz, C<sub>6</sub>D<sub>6</sub>): 0.76 (s, 3H, C<sub>9</sub>H<sub>3</sub> and C<sub>10</sub>H<sub>3</sub>), 0.92 (t,  $J = 7.3$ , 3H, C<sub>8</sub>H<sub>3</sub>), 1.04 (s, 3H, C<sub>9</sub>H<sub>3</sub> and C<sub>10</sub>H<sub>3</sub>), 1.07 (d,  $J = 6.7$ , 3H, C<sub>18</sub>H<sub>3</sub> or C<sub>19</sub>H<sub>3</sub> or C<sub>21</sub>H<sub>3</sub> or C<sub>22</sub>H<sub>3</sub>), 1.13 (d,  $J = 6.7$ , 3H, C<sub>18</sub>H<sub>3</sub> or C<sub>19</sub>H<sub>3</sub> or C<sub>21</sub>H<sub>3</sub> or C<sub>22</sub>H<sub>3</sub>), 1.22 (m, 1H, C<sub>2</sub>H), 1.30 (d,  $J = 6.7$ , 3H, C<sub>18</sub>H<sub>3</sub> or C<sub>19</sub>H<sub>3</sub> or C<sub>21</sub>H<sub>3</sub> or C<sub>22</sub>H<sub>3</sub>), 1.40 (d,  $J = 13.2$ , 1H, C<sub>5</sub>H), 1.53 (d,  $J = 6.7$ , 3H, C<sub>18</sub>H<sub>3</sub> or C<sub>19</sub>H<sub>3</sub> or C<sub>21</sub>H<sub>3</sub> or C<sub>22</sub>H<sub>3</sub>), 1.56 to 1.71 (m, 2H, C<sub>1</sub>H<sub>2</sub>), 1.76 (d,  $J = 13.2$ , 1H, C<sub>5</sub>H), 1.83 (dq,  $J = 14.3$ ,  $J = 7.3$ , 1H, C<sub>7</sub>H), 2.38 (ddd,  $J = 12.7$ ,  $J = 8.8$ ,  $J = 3.2$ , 1H, C<sub>2</sub>H), 2.46 (sept,  $J = 6.7$ , 1H, C<sub>17</sub>H<sub>3</sub> or C<sub>20</sub>H<sub>3</sub>), 2.71 (dq,  $J = 14.3$ ,  $J = 7.3$ , 1H, C<sub>7</sub>H), 2.90 (sept,  $J = 6.7$ , 1H, C<sub>17</sub>H<sub>3</sub> or C<sub>20</sub>H<sub>3</sub>), 3.08 (br. s, 1H, BH), 6.98 (dd,  $J = 7.6$ ,  $J = 1.3$ , 1H, C<sub>15</sub>H or C<sub>13</sub>H), 7.03 (dd,  $J = 7.9$ ,  $J = 1.3$ , 1H, C<sub>15</sub>H or C<sub>13</sub>H), 7.11 (t,  $J = 7.7$ , 1H, C<sub>14</sub>H); **<sup>1</sup>H{<sup>11</sup>B} NMR** (400 MHz, C<sub>6</sub>D<sub>6</sub>): 0.76 (s, 3H, C<sub>9</sub>H<sub>3</sub> and C<sub>10</sub>H<sub>3</sub>), 0.92 (t,  $J = 7.3$ , 3H, C<sub>8</sub>H<sub>3</sub>), 1.04 (s, 3H, C<sub>9</sub>H<sub>3</sub> and C<sub>10</sub>H<sub>3</sub>), 1.07 (d,  $J = 6.7$ , 3H, C<sub>18</sub>H<sub>3</sub> or C<sub>19</sub>H<sub>3</sub> or C<sub>21</sub>H<sub>3</sub> or C<sub>22</sub>H<sub>3</sub>), 1.13 (d,  $J = 6.7$ , 3H, C<sub>18</sub>H<sub>3</sub> or C<sub>19</sub>H<sub>3</sub> or C<sub>21</sub>H<sub>3</sub> or C<sub>22</sub>H<sub>3</sub>), 1.22 (m, 1H, C<sub>2</sub>H), 1.30 (d,  $J = 6.7$ , 3H, C<sub>18</sub>H<sub>3</sub> or C<sub>19</sub>H<sub>3</sub> or C<sub>21</sub>H<sub>3</sub> or C<sub>22</sub>H<sub>3</sub>), 1.40 (d,  $J = 13.2$ , 1H, C<sub>5</sub>H), 1.53 (d,  $J = 6.7$ , 3H, C<sub>18</sub>H<sub>3</sub> or C<sub>19</sub>H<sub>3</sub> or C<sub>21</sub>H<sub>3</sub> or C<sub>22</sub>H<sub>3</sub>), 1.56 to 1.71 (m, 2H, C<sub>1</sub>H<sub>2</sub>), 1.76 (d,  $J = 13.2$ , 1H, C<sub>5</sub>H), 1.83 (dq,  $J = 14.3$ ,  $J = 7.3$ , 1H, C<sub>7</sub>H), 2.38 (ddd,  $J = 12.7$ ,  $J = 8.8$ ,  $J = 3.2$ , 1H, C<sub>2</sub>H), 2.46 (sept,  $J = 6.7$ , 1H, C<sub>17</sub>H<sub>3</sub> or C<sub>20</sub>H<sub>3</sub>), 2.71 (dq,  $J = 14.3$ ,  $J = 7.3$ , 1H, C<sub>7</sub>H), 2.90 (sept,  $J = 6.7$ , 1H, C<sub>17</sub>H<sub>3</sub> or C<sub>20</sub>H<sub>3</sub>), 3.08 (dd,  $J = 8.6$ ,  $J = 3.9$ , 1H, BH), 6.98 (dd,  $J = 7.6$ ,  $J = 1.3$ , 1H, C<sub>15</sub>H or C<sub>13</sub>H), 6.03 (dd,  $J = 7.9$ ,  $J = 1.3$ , 1H, C<sub>15</sub>H or C<sub>13</sub>H), 7.11 (t,  $J = 7.7$ , 1H, C<sub>14</sub>H). **<sup>11</sup>B NMR** (161 MHz, C<sub>6</sub>D<sub>6</sub>): -10.87 (d,  $J = 86.0$ ); **<sup>11</sup>B{<sup>1</sup>H} NMR** (161 MHz, C<sub>6</sub>D<sub>6</sub>): -10.87 (s); **<sup>13</sup>C{<sup>1</sup>H} NMR** (126 MHz,

C<sub>6</sub>D<sub>6</sub>): 9.70 (s, C<sub>8</sub>), 20.23 (br. s, C<sub>1</sub>), 23.99 (s, C<sub>18</sub> or C<sub>19</sub> or C<sub>21</sub> or C<sub>22</sub>), 24.36 (s, C<sub>18</sub> or C<sub>19</sub> or C<sub>21</sub> or C<sub>22</sub>), 25.86 (s, C<sub>18</sub> or C<sub>19</sub> or C<sub>21</sub> or C<sub>22</sub>), 26.99 (s, C<sub>18</sub> or C<sub>19</sub> or C<sub>21</sub> or C<sub>22</sub>), 28.32 (s, C<sub>9</sub> or C<sub>10</sub>), 28.83 (s, C<sub>9</sub> or C<sub>10</sub>), 29.11 (s, C<sub>17</sub> or C<sub>20</sub>), 29.16 (s, C<sub>7</sub>), 29.81 (s, C<sub>17</sub> or C<sub>20</sub>), 35.82 (s, C<sub>2</sub>), 47.05 (s, C<sub>5</sub>), 64.76 (s, C<sub>3</sub>), 84.83 (s, C<sub>6</sub>), 125.02 (s, C<sub>13</sub> or C<sub>15</sub>), 125.36 (s, C<sub>13</sub> or C<sub>15</sub>), 130.00 (s, C<sub>14</sub>), 132.39 (s, C<sub>11</sub>), 145.47 (s, C<sub>12</sub> or C<sub>16</sub>), 145.58 (s, C<sub>12</sub> or C<sub>16</sub>). (Some assignments of the peaks were accomplished by the assistance of 2D spectra)  
**HRMS** (m/z): [M]<sup>+</sup> calcd. for C<sub>22</sub>H<sub>35</sub>BCIN, 359.25511; found 359.25608. **Elemental analysis**: calcd. for C<sub>22</sub>H<sub>35</sub>BCIN, C, 73.44; H, 9.81; N, 3.89; found: C, 73.71; H, 9.64; N, 3.75.

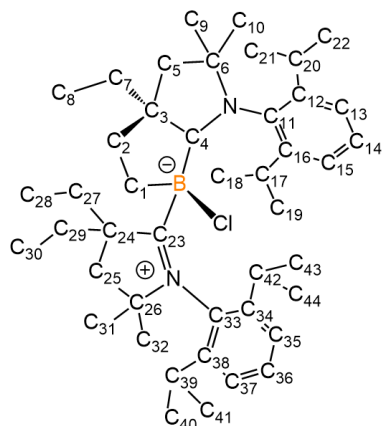

**<sup>1</sup>H NMR** (500 MHz, C<sub>6</sub>D<sub>6</sub>): 0.09 (m, 1H, C<sub>1</sub>H), 0.21 (m, 1H, C<sub>1</sub>H), 0.50 (t, *J* = 7.4, 3H, C<sub>28</sub>H<sub>3</sub> or C<sub>30</sub>H<sub>3</sub>), 0.67 (s, 3H, C<sub>9</sub>H<sub>3</sub> or C<sub>10</sub>H<sub>3</sub>), 0.74 (t, *J* = 7.5, 3H, C<sub>28</sub>H<sub>3</sub> or C<sub>30</sub>H<sub>3</sub>), 0.75 (s, 3H, C<sub>9</sub>H<sub>3</sub> or C<sub>10</sub>H<sub>3</sub>), 0.97 (m, 3H, C<sub>8</sub>H<sub>3</sub>), 0.98 (d, *J* = 6.6, 3H, C<sub>40</sub>H<sub>3</sub> or C<sub>41</sub>H<sub>3</sub> or C<sub>43</sub>H<sub>3</sub> or C<sub>44</sub>H<sub>3</sub>), 1.05 (d, *J* = 6.6, 3H, C<sub>40</sub>H<sub>3</sub> or C<sub>41</sub>H<sub>3</sub> or C<sub>43</sub>H<sub>3</sub> or C<sub>44</sub>H<sub>3</sub>), 1.17 (s, 3H, C<sub>31</sub>H<sub>3</sub> or C<sub>32</sub>H<sub>3</sub>), 1.22 (s, 3H, C<sub>31</sub>H<sub>3</sub> or C<sub>32</sub>H<sub>3</sub>), 1.24 (d, *J* = 6.6, 3H, C<sub>40</sub>H<sub>3</sub> or C<sub>41</sub>H<sub>3</sub> or C<sub>43</sub>H<sub>3</sub> or C<sub>44</sub>H<sub>3</sub>), 1.25 (d, *J* = 6.7, 3H, C<sub>18</sub>H<sub>3</sub> or C<sub>19</sub>H<sub>3</sub> or C<sub>21</sub>H<sub>3</sub> or C<sub>22</sub>H<sub>3</sub>), 1.39 (d, *J* = 6.8, 3H, C<sub>18</sub>H<sub>3</sub> or C<sub>19</sub>H<sub>3</sub> or C<sub>21</sub>H<sub>3</sub> or C<sub>22</sub>H<sub>3</sub>), 1.40 (m, 1H, C<sub>5</sub>H), 1.48 (m, 1H, C<sub>5</sub>H), 1.51 (m, 2H, C<sub>27</sub>H<sub>2</sub> or C<sub>29</sub>H<sub>2</sub>), 1.53 (d, *J* = 6.8, 3H, C<sub>18</sub>H<sub>3</sub> or C<sub>19</sub>H<sub>3</sub> or C<sub>21</sub>H<sub>3</sub> or C<sub>22</sub>H<sub>3</sub>), 1.63 (d, *J* = 6.8, 3H, C<sub>18</sub>H<sub>3</sub> or C<sub>19</sub>H<sub>3</sub> or C<sub>21</sub>H<sub>3</sub> or C<sub>22</sub>H<sub>3</sub>), 1.63 (d, *J* = 6.5, 3H, C<sub>40</sub>H<sub>3</sub> or C<sub>41</sub>H<sub>3</sub> or C<sub>43</sub>H<sub>3</sub> or C<sub>44</sub>H<sub>3</sub>), 1.64 (m, 1H, C<sub>7</sub>H), 1.70 (m, 1H, C<sub>2</sub>H), 1.76 (m, 1H, C<sub>7</sub>H), 1.78 (m, 1H, C<sub>27</sub>H or C<sub>29</sub>H), 1.90 (m, 1H, C<sub>27</sub>H or C<sub>29</sub>H), 1.99 (s, 2H, C<sub>25</sub>H<sub>2</sub>), 2.45 (sept., *J* = 6.6, 1H, C<sub>39</sub>H<sub>3</sub> or C<sub>42</sub>H<sub>3</sub>), 2.73 (m, 1H, C<sub>2</sub>H), 3.51 (sept., *J* = 6.5, 1H, C<sub>39</sub>H<sub>3</sub> or C<sub>42</sub>H<sub>3</sub>), 3.56 (sept., *J* = 6.7, 1H, C<sub>17</sub>H<sub>3</sub> or C<sub>20</sub>H<sub>3</sub>), 3.62 (s, 1H, C<sub>4</sub>H), 5.02 (sept., *J* = 6.8, 1H, C<sub>17</sub>H<sub>3</sub> or C<sub>20</sub>H<sub>3</sub>), 6.88 (dd, *J* = 7.1, *J* = 2.1, 1H, C<sub>35</sub>H<sub>3</sub> or C<sub>37</sub>H<sub>3</sub>), 7.04 (m, 1H, C<sub>35</sub>H<sub>3</sub> or C<sub>36</sub>H<sub>3</sub> or C<sub>37</sub>H<sub>3</sub>), 7.06 (m, 1H, C<sub>35</sub>H<sub>3</sub> or C<sub>36</sub>H<sub>3</sub> or C<sub>37</sub>H<sub>3</sub>), 7.15 (m, 1H, C<sub>13</sub>H<sub>3</sub> or C<sub>14</sub>H<sub>3</sub> or C<sub>15</sub>H<sub>3</sub>), 7.19 (m, 1H, C<sub>13</sub>H<sub>3</sub> or C<sub>14</sub>H<sub>3</sub> or C<sub>15</sub>H<sub>3</sub>), 7.30 (m, 1H, C<sub>13</sub>H<sub>3</sub> or C<sub>14</sub>H<sub>3</sub> or C<sub>15</sub>H<sub>3</sub>); **<sup>11</sup>B NMR** (161 MHz, C<sub>6</sub>D<sub>6</sub>): 2.95 (s); **<sup>13</sup>C{<sup>1</sup>H} NMR** (126 MHz, C<sub>6</sub>D<sub>6</sub>): 10.84 (s, C<sub>28</sub> or C<sub>30</sub>), 10.94 (s, C<sub>28</sub> or C<sub>30</sub>), 11.17 (s, C<sub>8</sub>), 22.43 (br. s, C<sub>1</sub>), 23.69 (s, C<sub>18</sub> or C<sub>19</sub> or C<sub>21</sub> or C<sub>22</sub>), 24.56 (s, C<sub>18</sub> or C<sub>19</sub> or C<sub>21</sub> or C<sub>22</sub>), 25.13 (s, C<sub>40</sub> or C<sub>41</sub> or C<sub>43</sub> or C<sub>44</sub>), 25.68 (s, C<sub>40</sub> or C<sub>41</sub> or C<sub>43</sub> or C<sub>44</sub>), 26.36 (s, C<sub>9</sub> or C<sub>10</sub>), 26.88 (s, C<sub>40</sub> or C<sub>41</sub> or C<sub>43</sub> or C<sub>44</sub>), 27.25 (s, C<sub>40</sub> or C<sub>41</sub> or C<sub>43</sub> or C<sub>44</sub>), 27.29 (s, C<sub>17</sub> or C<sub>20</sub>), 27.57 (s, C<sub>18</sub> or C<sub>19</sub> or C<sub>21</sub> or C<sub>22</sub>), 27.87 (s, C<sub>18</sub> or C<sub>19</sub> or C<sub>21</sub> or C<sub>22</sub>), 28.20 (s, C<sub>9</sub> or C<sub>10</sub>), 28.60 (s, C<sub>39</sub> or C<sub>42</sub>), 28.81 (s, C<sub>39</sub> or C<sub>42</sub>), 29.65 (s, C<sub>17</sub> or C<sub>20</sub>), 30.41 (s, C<sub>31</sub> or C<sub>32</sub>), 30.50 (s, C<sub>31</sub> or C<sub>32</sub>), 32.73 (s, C<sub>27</sub> or C<sub>29</sub>), 32.78 (s, C<sub>2</sub>), 33.33 (s, C<sub>7</sub>), 34.86 (s, C<sub>27</sub> or C<sub>29</sub>), 42.43 (s, C<sub>5</sub>), 56.14 (s, C<sub>24</sub>), 56.34 (s, C<sub>27</sub> or C<sub>29</sub>), 56.37 (s, C<sub>3</sub>), 61.59 (s, C<sub>26</sub>), 65.12 (s, C<sub>6</sub>), 77.40 (br. s, C<sub>4</sub>), 124.87 (s, C<sub>35</sub> or C<sub>37</sub>),



124.93 (s, C<sub>13</sub> or C<sub>14</sub> or C<sub>15</sub>), 125.18 (s, C<sub>13</sub> or C<sub>14</sub> or C<sub>15</sub>), 125.31 (s, C<sub>35</sub> or C<sub>36</sub> or C<sub>37</sub>), 126.61 (s, C<sub>13</sub> or C<sub>14</sub> or C<sub>15</sub>), 129.85 (s, C<sub>35</sub> or C<sub>36</sub> or C<sub>37</sub>), 136.52 (s, C<sub>34</sub> or C<sub>38</sub>), 145 (s, C<sub>34</sub> or C<sub>38</sub>), 146.42 (s, C<sub>33</sub>), 149.28 (s, C<sub>12</sub> or C<sub>16</sub>), 149.60 (s, C<sub>11</sub>), 152.30 (s, C<sub>12</sub> or C<sub>16</sub>).  
 (Some assignments of the peaks were accomplished by the assistance of 2D spectra)  
**HRMS (m/z):** [M+H]<sup>+</sup> calcd. for C<sub>44</sub>H<sub>71</sub>BCIN<sub>2</sub>, 673.53988; found 673.54293.

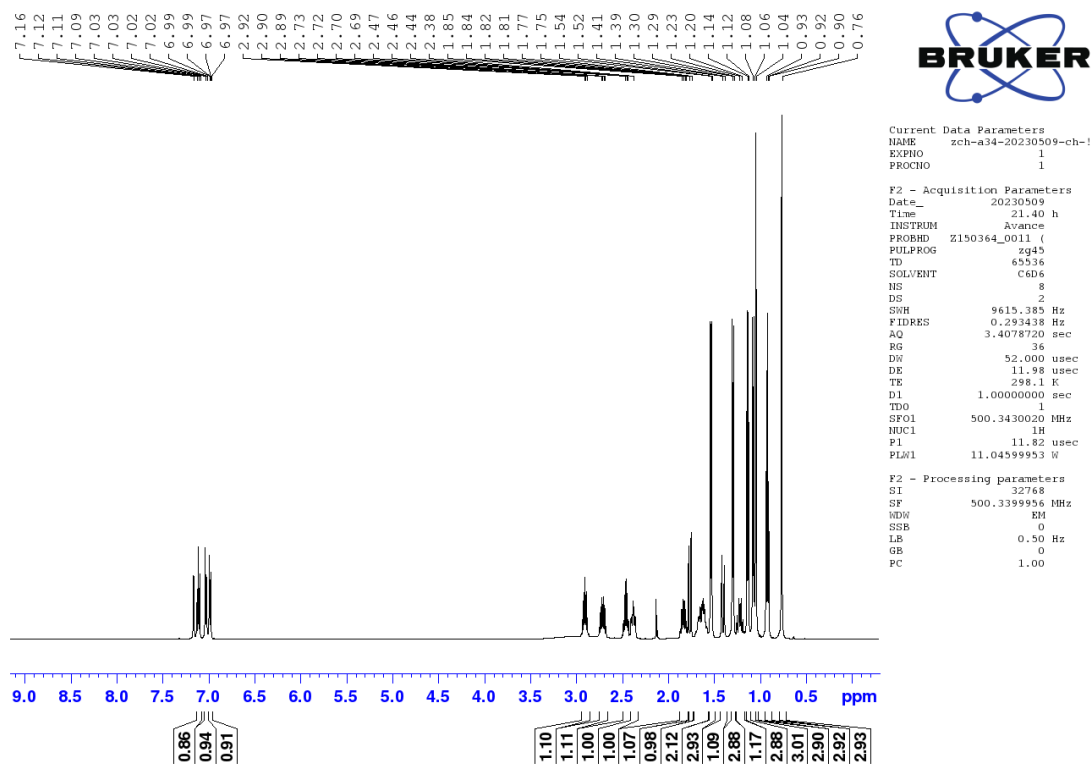

**Figure S19.** <sup>1</sup>H NMR spectrum of **3** in C<sub>6</sub>D<sub>6</sub>.

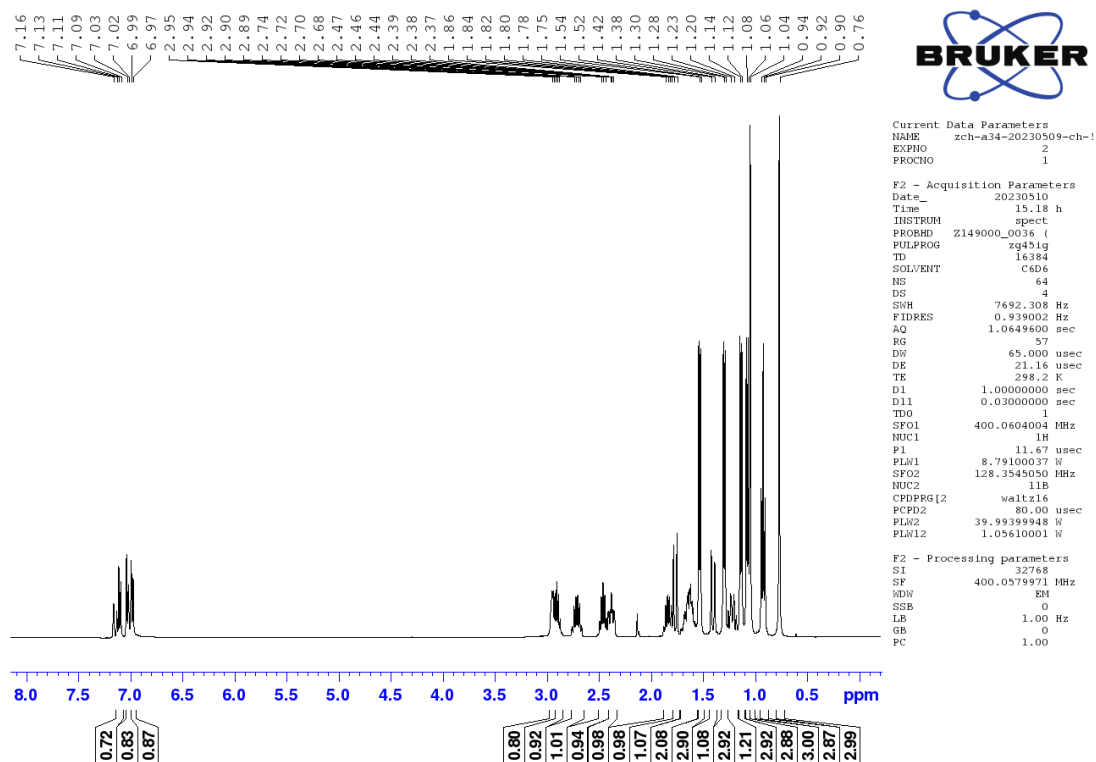

Figure S20.  $^1\text{H}\{^{11}\text{B}\}$  NMR spectrum of **3** in  $\text{C}_6\text{D}_6$ .

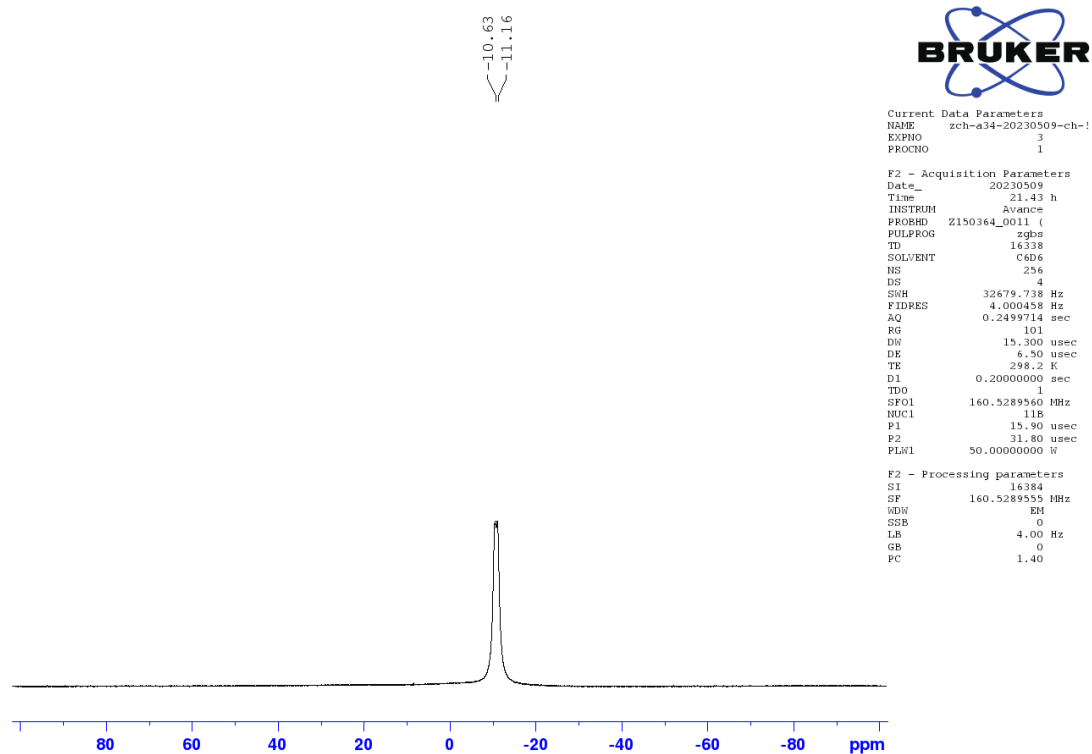

Figure S21.  $^{11}\text{B}$  NMR spectrum of **3** in  $\text{C}_6\text{D}_6$ .

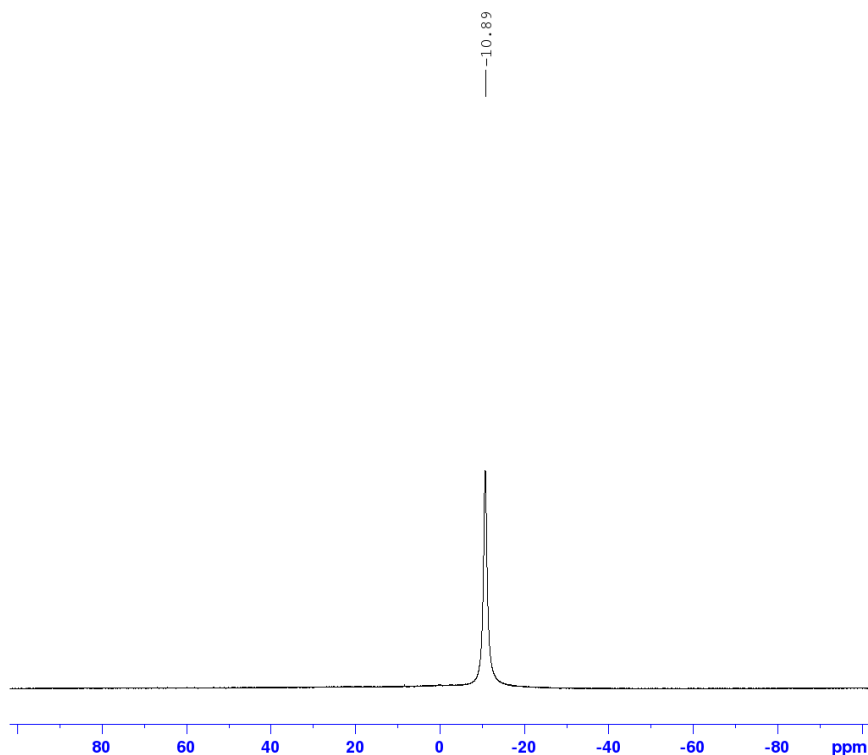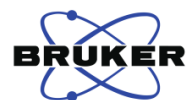

Current Data Parameters  
 NAME zch-a34-20230509-ch-1  
 EXPNO 4  
 PROCNO 1

F2 - Acquisition Parameters  
 Date\_ 20230509  
 Time 21.46 h  
 INSTRUM Avance  
 PROBRD Z150364\_0011 ( (   
 PULPROG zgpg3g  
 TD 16338  
 SOLVENT C6D6  
 NS 256  
 DS 4  
 SNR 32679.738 Hz  
 FIDRES 4.000458 Hz  
 AQ 0.2499714 sec  
 RG 101  
 DW 15.300 usec  
 DE 6.50 usec  
 TE 298.1 K  
 D1 0.20000000 sec  
 D2 0 sec  
 TDO 1  
 SF01 160.5289560 MHz  
 HUC1 11B  
 P1 15.90 usec  
 P2 31.80 usec  
 PLW1 50.00000000 W  
 SF02 500.3425000 MHz  
 HUC2 1H  
 CPDPRG[2] waltz64  
 PCPD2 80.00 usec  
 PLW2 11.04599953 W  
 PLW12 0.23504999 W

F2 - Processing parameters  
 SI 16384  
 SF 160.5289555 MHz  
 WDW EM  
 SSB 0  
 LB 4.00 Hz  
 GB 0  
 PC 1.40

Figure S22.  $^{11}\text{B}\{^1\text{H}\}$  NMR spectrum of **3** in  $\text{C}_6\text{D}_6$ .

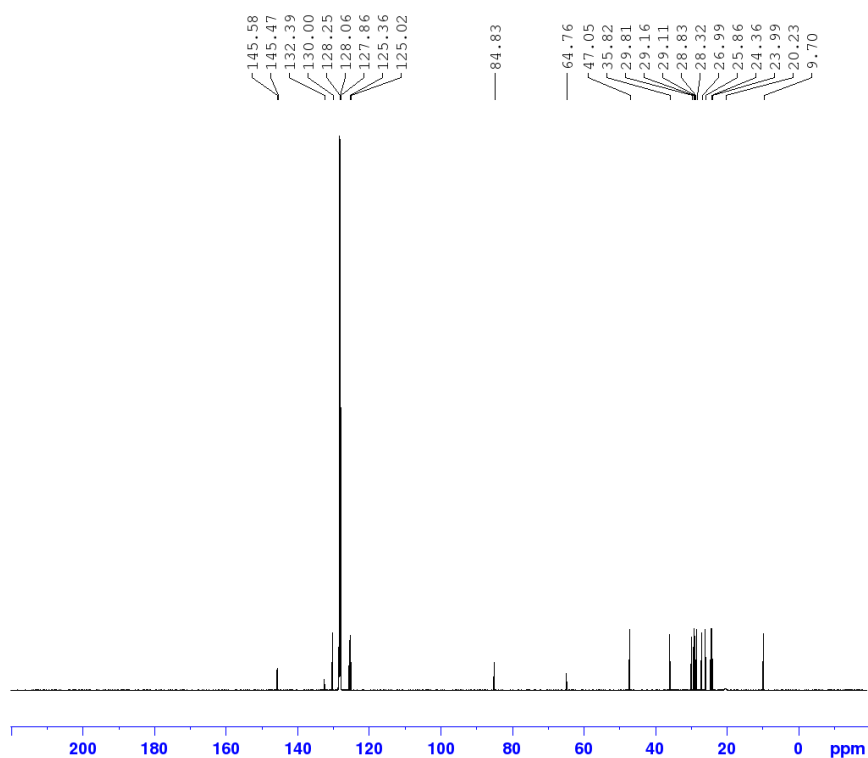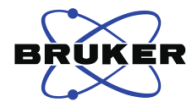

Current Data Parameters  
 NAME zch-a34-20230509-ch-1  
 EXPNO 5  
 PROCNO 1

F2 - Acquisition Parameters  
 Date\_ 20230509  
 Time 22.25 h  
 INSTRUM Avance  
 PROBRD Z150364\_0011 ( (   
 PULPROG zgpg3g  
 TD 32768  
 SOLVENT C6D6  
 NS 2948  
 DS 16  
 SWH 30120.482 Hz  
 FIDRES 1.838408 Hz  
 AQ 0.5439488 sec  
 RG 101  
 DW 16.600 usec  
 DE 6.50 usec  
 TE 298.1 K  
 D1 0.45605120 sec  
 D11 0.03000000 sec  
 D21 0.00100000 sec  
 TDO 1  
 SF01 125.8231741 MHz  
 HUC1 13C  
 CHST18 30.0000000  
 P0 3.09 usec  
 P1 9.26 usec  
 P13 799.50 usec  
 PLW1 67.92500305 W  
 SPNAM[5] zgpg3g\_sp5.vv  
 SPOAL5 0.500  
 SPOFF5 0 Hz  
 SPW5 11.66079044 W  
 SF02 500.3420014 MHz  
 HUC2 1H  
 CPDPRG[2] waltz65  
 PCPD2 80.00 usec  
 PLW2 11.04599953 W  
 PLW12 0.23504999 W  
 PLW13 0.11823000 W  
 GPHAM[1] SHSQ10.100  
 GPZ1 37.00 k  
 F16 1000.00 usec

F2 - Processing parameters  
 SI 32768  
 SF 125.8105465 MHz  
 WDW EM  
 SSB 0  
 LB 1.00 Hz  
 GB 0  
 PC 1.40

Figure S23.  $^{13}\text{C}\{^1\text{H}\}$  NMR spectrum of **3** in  $\text{C}_6\text{D}_6$ .

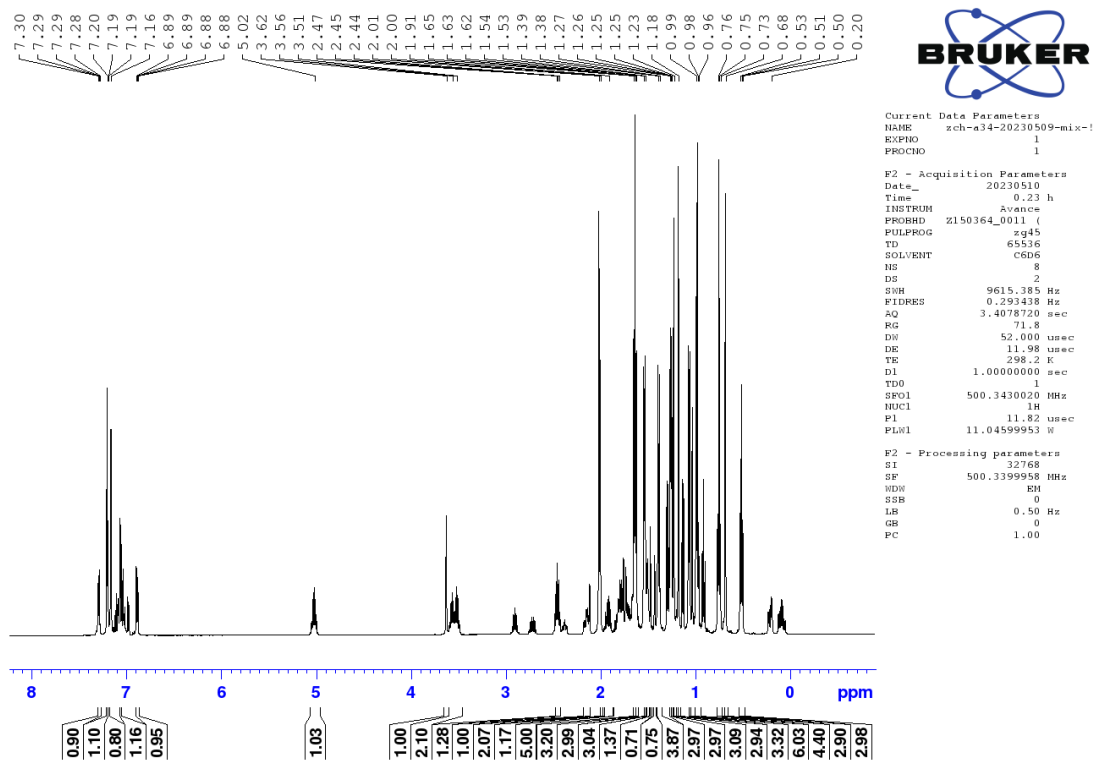

**Figure S24.**  $^1\text{H}$  NMR spectrum of mixed **3** and **4** in  $\text{C}_6\text{D}_6$ . Only the signals belonging to **4** were labeled and integrated.

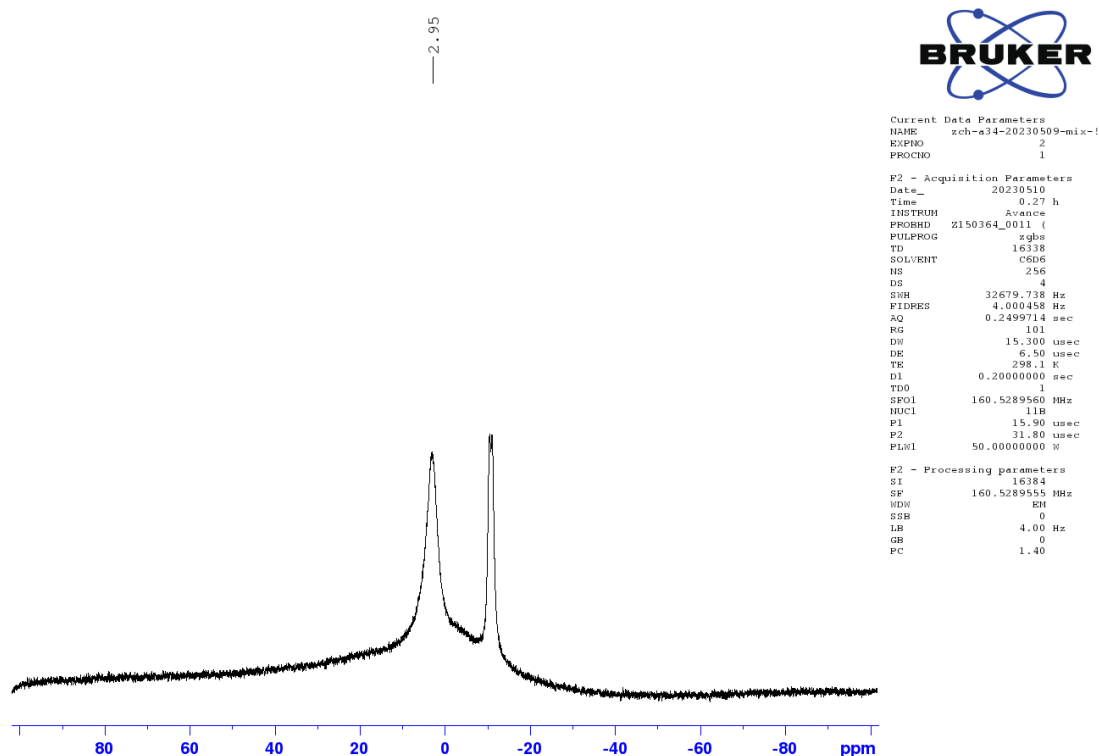

**Figure S25.**  $^{11}\text{B}$  NMR spectrum of mixed **3** and **4** in  $\text{C}_6\text{D}_6$ . Only the signals belonging to **4** were labeled.

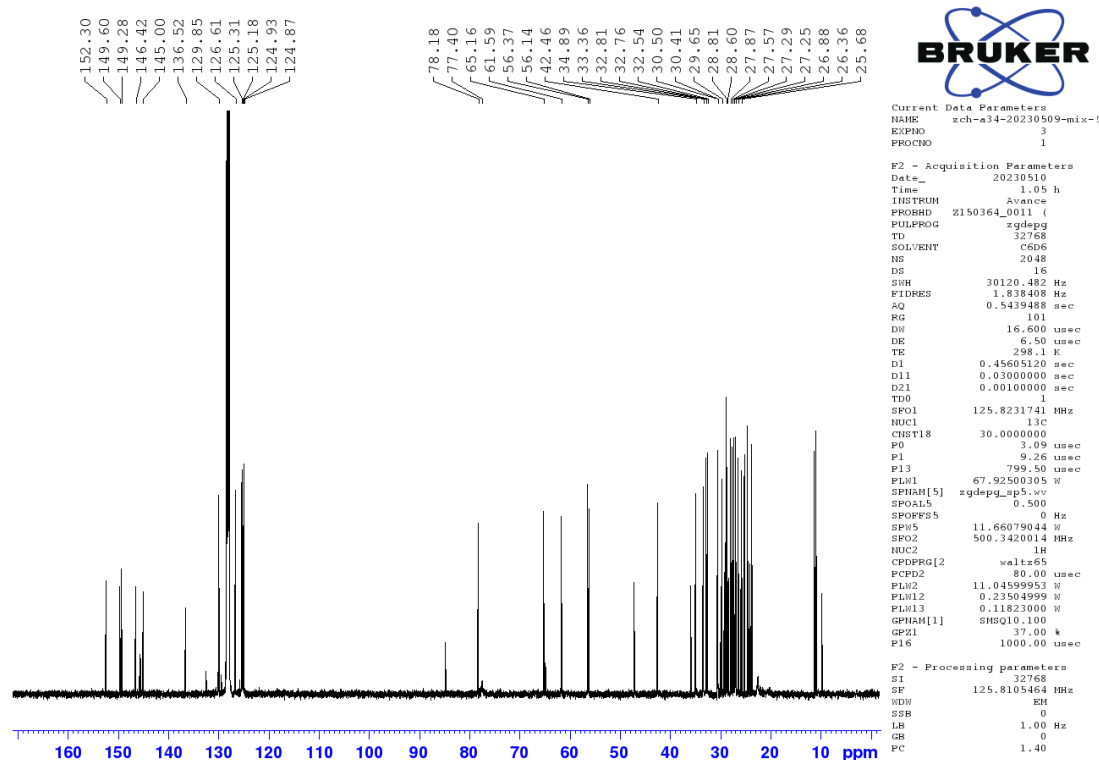

**Figure S26.**  $^{13}\text{C}\{^1\text{H}\}$  NMR spectrum of mixed **3** and **4** in  $\text{C}_6\text{D}_6$ . Only the signals belonging to **4** were labeled.

**The reaction of  $2^{\text{Cl}}$  with  $^{\text{Cy}}\text{CAAC}$ :** to a toluene (60 mL) solution of  $2^{\text{Cl}}$  (371 mg, 1.78 mmol, 1.0 equiv), a toluene (20 mL) solution of  $^{\text{Cy}}\text{CAAC}$  (580 mg, 1.78 mmol, 1.0 equiv) was slowly added at 25 °C while stirring. The solution immediately turned orange and solids precipitated. The solution was stirred overnight to afford a dark orange suspension. All volatiles in the suspension were removed under reduced pressure, and the remaining solids were washed with hexanes (40 mL $\times$ 2). The washed solids were dissolved in DCM (2 mL), and hexanes (1 mL) was slowly added. The solution was stored at -35 °C for 2 days and white solids precipitated from the solution. The mother liquid was removed by filtration and the solids were dried under vacuum to afford compound  $5^{\text{Cl}}$  (270 mg, 41%) as a white powder.

**NMR yield determination:** to a toluene (1 mL) solution of  $2^{\text{Cl}}$  (10.4 mg, 0.05 mmol, 1.0 equiv), a toluene (1 mL) solution of  $^{\text{Cy}}\text{CAAC}$  (16.3 mg, 0.05 mmol, 1.0 equiv) was slowly added at 25 °C while stirring. The solution was stirred overnight. Acenaphthene (7.7 mg, 0.05 mmol, 1.0 equiv) was then added to the solution as an internal reference. All volatiles in the solution were removed under vacuum and the remaining solids were dissolved in deuterated DCM. The  $^1\text{H}$  NMR spectrum suggested that the yield of  $5^{\text{Cl}}$  and  $\text{C}_6\text{Me}_6$  was 62% and 74%, respectively.

**The reaction of **7** with  $[\text{PPN}]\text{Cl}$ :** compound **7** (28.3 mg, 0.05 mmol, 1.0 equiv) and  $[\text{PPN}]\text{Cl}$  (143 mg, 0.25 mmol, 5.0 equiv) were suspended in toluene and the mixture was stirred overnight at room temperature. All volatiles in the solution were removed under vacuum to

afford a mixture of **5<sup>Cl</sup>**, [PPN]Br, and C<sub>6</sub>Me<sub>6</sub>. The <sup>1</sup>H NMR spectrum (in C<sub>6</sub>D<sub>6</sub>) suggested that the ratio of **5<sup>Cl</sup>** and C<sub>6</sub>Me<sub>6</sub> was 1.0:1.1.

The product was characterized as two diastereomers.

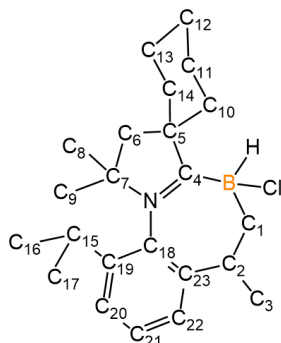

Major Isomer (67%):

**<sup>1</sup>H NMR** (500 MHz, C<sub>6</sub>D<sub>6</sub>): 0.70 (s, 3H, C<sub>8</sub>H<sub>3</sub> or C<sub>9</sub>H<sub>3</sub>), 0.93 (s, 3H, C<sub>8</sub>H<sub>3</sub> or C<sub>9</sub>H<sub>3</sub>), 1.02 (d, *J* = 6.6, 3H, C<sub>3</sub>H<sub>3</sub> or C<sub>16</sub>H<sub>3</sub> or C<sub>17</sub>H<sub>3</sub>), 1.07 (tt, *J* = 12.7, *J* = 3.6, 2H, C<sub>12</sub>H<sub>3</sub>), 1.13 (d, *J* = 6.9, 3H, C<sub>3</sub>H<sub>3</sub> or C<sub>16</sub>H<sub>3</sub> or C<sub>17</sub>H<sub>3</sub>), 1.15 (1H, C<sub>10</sub>H or C<sub>14</sub>H), 1.32 (d, *J* = 6.6, 3H, C<sub>3</sub>H<sub>3</sub> or C<sub>16</sub>H<sub>3</sub> or C<sub>17</sub>H<sub>3</sub>), 1.34 (1H, C<sub>10</sub>H or C<sub>14</sub>H), 1.56 (1H, C<sub>6</sub>H), 1.56 (2H, C<sub>11</sub>H or C<sub>13</sub>H), 1.59 (m, 2H, C<sub>1</sub>H<sub>2</sub>), 1.59 (2H, C<sub>11</sub>H or C<sub>13</sub>H), 1.70 (d, *J* = 13.7, 1H, C<sub>6</sub>H), 2.56 (m, 1H, C<sub>2</sub>H or C<sub>15</sub>H), 2.65 (sept, *J* = 6.9, 1H, C<sub>2</sub>H or C<sub>15</sub>H), 3.00 (br. s, 1H, BH), 3.37 (dt, *J* = 13.5, *J* = 4.0, 1H, C<sub>10</sub>H or C<sub>14</sub>H), 3.43 (dt, *J* = 13.4, *J* = 4.0, 1H, C<sub>10</sub>H or C<sub>14</sub>H), 7.04 (m, 1H, C<sub>20</sub>H or C<sub>21</sub>H or C<sub>22</sub>H), 7.07 (m, 1H, C<sub>20</sub>H or C<sub>21</sub>H or C<sub>22</sub>H), 7.15 (m, 1H, C<sub>20</sub>H or C<sub>21</sub>H or C<sub>22</sub>H); **<sup>1</sup>H{<sup>11</sup>B} NMR** (400 MHz, C<sub>6</sub>D<sub>6</sub>): 0.70 (s, 3H, C<sub>8</sub>H<sub>3</sub> or C<sub>9</sub>H<sub>3</sub>), 0.93 (s, 3H, C<sub>8</sub>H<sub>3</sub> or C<sub>9</sub>H<sub>3</sub>), 1.02 (d, *J* = 6.6, 3H, C<sub>3</sub>H<sub>3</sub> or C<sub>16</sub>H<sub>3</sub> or C<sub>17</sub>H<sub>3</sub>), 1.07 (tt, *J* = 12.7, *J* = 3.6, 2H, C<sub>12</sub>H<sub>3</sub>), 1.13 (d, *J* = 6.9, 3H, C<sub>3</sub>H<sub>3</sub> or C<sub>16</sub>H<sub>3</sub> or C<sub>17</sub>H<sub>3</sub>), 1.15 (1H, C<sub>10</sub>H or C<sub>14</sub>H), 1.32 (d, *J* = 6.6, 3H, C<sub>3</sub>H<sub>3</sub> or C<sub>16</sub>H<sub>3</sub> or C<sub>17</sub>H<sub>3</sub>), 1.34 (1H, C<sub>10</sub>H or C<sub>14</sub>H), 1.56 (1H, C<sub>6</sub>H), 1.56 (2H, C<sub>11</sub>H or C<sub>13</sub>H), 1.59 (m, 2H, C<sub>1</sub>H<sub>2</sub>), 1.59 (2H, C<sub>11</sub>H or C<sub>13</sub>H), 1.70 (d, *J* = 13.7, 1H, C<sub>6</sub>H), 2.56 (m, 1H, C<sub>2</sub>H or C<sub>15</sub>H), 2.65 (sept, *J* = 6.9, 1H, C<sub>2</sub>H or C<sub>15</sub>H), 3.01 (m, 1H, BH), 3.37 (dt, *J* = 13.5, *J* = 4.0, 1H, C<sub>10</sub>H or C<sub>14</sub>H), 3.43 (dt, *J* = 13.4, *J* = 4.0, 1H, C<sub>10</sub>H or C<sub>14</sub>H), 7.04 (m, 1H, C<sub>20</sub>H or C<sub>21</sub>H or C<sub>22</sub>H), 7.07 (m, 1H, C<sub>20</sub>H or C<sub>21</sub>H or C<sub>22</sub>H), 7.15 (m, 1H, C<sub>20</sub>H or C<sub>21</sub>H or C<sub>22</sub>H); **<sup>11</sup>B NMR** (161 MHz, C<sub>6</sub>D<sub>6</sub>): -7.95 (br. d, *J* = 67.6); **<sup>11</sup>B{<sup>1</sup>H} NMR** (161 MHz, C<sub>6</sub>D<sub>6</sub>): -7.99 (s); **<sup>13</sup>C{<sup>1</sup>H} NMR** (126 MHz, C<sub>6</sub>D<sub>6</sub>): 20.86 (s, C<sub>3</sub> or C<sub>16</sub> or C<sub>17</sub>), 21.74 (s, C<sub>3</sub> or C<sub>16</sub> or C<sub>17</sub>), 22.15 (s, C<sub>11</sub> or C<sub>13</sub>), 22.34 (s, C<sub>12</sub>), 25.11 (s, C<sub>11</sub> or C<sub>13</sub>), 25.88 (s, C<sub>3</sub> or C<sub>16</sub> or C<sub>17</sub>), 28.41 (s, C<sub>8</sub> or C<sub>8</sub>), 29.99 (s, C<sub>8</sub> or C<sub>9</sub>), 30.10 (s, C<sub>2</sub> or C<sub>15</sub>), 32.01 (s, C<sub>10</sub> or C<sub>14</sub>), 34.47 (s, C<sub>2</sub> or C<sub>15</sub>), 34.74 (s, C<sub>10</sub> or C<sub>14</sub>), 40.48 (br. s, C<sub>1</sub>), 46.85 (s, C<sub>6</sub>), 58.60 (s, C<sub>5</sub>), 77.57 (s, C<sub>7</sub>), 122.30 (s, C<sub>20</sub> or C<sub>21</sub> or C<sub>22</sub>), 124.17 (s, C<sub>20</sub> or C<sub>21</sub> or C<sub>22</sub>), 129.78 (s, C<sub>20</sub> or C<sub>21</sub> or C<sub>22</sub>), 133.28 (s, C<sub>18</sub> or C<sub>19</sub> or C<sub>23</sub>), 143.34 (s, C<sub>18</sub> or C<sub>19</sub> or C<sub>23</sub>), 144.37 (s, C<sub>18</sub> or C<sub>19</sub> or C<sub>23</sub>).

Minor Isomer (33%):

**<sup>1</sup>H NMR** (500 MHz, C<sub>6</sub>D<sub>6</sub>): 0.58 (s, 3H, C<sub>8</sub>H<sub>3</sub> or C<sub>9</sub>H<sub>3</sub>), 1.01 (2H, C<sub>11</sub>H<sub>2</sub> or C<sub>12</sub>H<sub>2</sub> or C<sub>13</sub>H<sub>2</sub>), 1.09 (2H, C<sub>11</sub>H<sub>2</sub> or C<sub>12</sub>H<sub>2</sub> or C<sub>13</sub>H<sub>2</sub>), 1.12 (3H, C<sub>3</sub>H<sub>3</sub> or C<sub>16</sub>H<sub>3</sub> or C<sub>17</sub>H<sub>3</sub>), 1.25 (1H, C<sub>1</sub>H), 1.30 (3H, C<sub>3</sub>H<sub>3</sub> or C<sub>16</sub>H<sub>3</sub> or C<sub>17</sub>H<sub>3</sub>), 1.39 (s, 3H, C<sub>8</sub>H<sub>3</sub> or C<sub>9</sub>H<sub>3</sub>), 1.46 (1H, C<sub>10</sub>H or C<sub>14</sub>H), 1.46 (1H, C<sub>6</sub>H), 1.47 (3H, C<sub>3</sub>H<sub>3</sub> or C<sub>16</sub>H<sub>3</sub> or C<sub>17</sub>H<sub>3</sub>), 1.51 (2H, C<sub>11</sub>H<sub>2</sub> or C<sub>12</sub>H<sub>2</sub> or C<sub>13</sub>H<sub>2</sub>), 1.61 (1H, C<sub>6</sub>H), 1.73 (1H, C<sub>10</sub>H or C<sub>14</sub>H), 1.85 (1H, C<sub>1</sub>H), 1.92 (1H, C<sub>10</sub>H or C<sub>14</sub>H), 1.99 (1H, C<sub>10</sub>H or C<sub>14</sub>H), 2.75 (1H, C<sub>2</sub>H or C<sub>15</sub>H), 3.46 (1H, C<sub>2</sub>H or C<sub>15</sub>H), 6.99 (m, 1H, C<sub>20</sub>H or C<sub>21</sub>H or C<sub>22</sub>H),

7.06 (m, 1H, C<sub>20</sub>H or C<sub>21</sub>H or C<sub>22</sub>H), 7.14 (m, 1H, C<sub>20</sub>H or C<sub>21</sub>H or C<sub>22</sub>H); <sup>1</sup>H{<sup>11</sup>B} NMR (400 MHz, C<sub>6</sub>D<sub>6</sub>): 0.58 (s, 3H, C<sub>8</sub>H<sub>3</sub> or C<sub>9</sub>H<sub>3</sub>), 1.01 (2H, C<sub>11</sub>H<sub>2</sub> or C<sub>12</sub>H<sub>2</sub> or C<sub>13</sub>H<sub>2</sub>), 1.09 (2H, C<sub>11</sub>H<sub>2</sub> or C<sub>12</sub>H<sub>2</sub> or C<sub>13</sub>H<sub>2</sub>), 1.12 (3H, C<sub>3</sub>H<sub>3</sub> or C<sub>16</sub>H<sub>3</sub> or C<sub>17</sub>H<sub>3</sub>), 1.25 (1H, C<sub>1</sub>H), 1.30 (3H, C<sub>3</sub>H<sub>3</sub> or C<sub>16</sub>H<sub>3</sub> or C<sub>17</sub>H<sub>3</sub>), 1.39 (s, 3H, C<sub>8</sub>H<sub>3</sub> or C<sub>9</sub>H<sub>3</sub>), 1.46 (1H, C<sub>10</sub>H or C<sub>14</sub>H), 1.46 (1H, C<sub>6</sub>H), 1.47 (3H, C<sub>3</sub>H<sub>3</sub> or C<sub>16</sub>H<sub>3</sub> or C<sub>17</sub>H<sub>3</sub>), 1.51 (2H, C<sub>11</sub>H<sub>2</sub> or C<sub>12</sub>H<sub>2</sub> or C<sub>13</sub>H<sub>2</sub>), 1.61 (1H, C<sub>6</sub>H), 1.73 (1H, C<sub>10</sub>H or C<sub>14</sub>H), 1.85 (1H, C<sub>1</sub>H), 1.92 (1H, C<sub>10</sub>H or C<sub>14</sub>H), 1.99 (1H, C<sub>10</sub>H or C<sub>14</sub>H), 2.75 (1H, C<sub>2</sub>H or C<sub>15</sub>H), 3.46 (1H, C<sub>2</sub>H or C<sub>15</sub>H), 3.54 (m, 1H, BH), 6.99 (m, 1H, C<sub>20</sub>H or C<sub>21</sub>H or C<sub>22</sub>H), 7.06 (m, 1H, C<sub>20</sub>H or C<sub>21</sub>H or C<sub>22</sub>H), 7.14 (m, 1H, C<sub>20</sub>H or C<sub>21</sub>H or C<sub>22</sub>H); <sup>1</sup>B NMR (161 MHz, C<sub>6</sub>D<sub>6</sub>): -4.73 (br. d, J = 137.4); <sup>11</sup>B{<sup>1</sup>H} NMR (161 MHz, C<sub>6</sub>D<sub>6</sub>): -4.78 (s); <sup>13</sup>C{<sup>1</sup>H} NMR (126 MHz, C<sub>6</sub>D<sub>6</sub>): 19.72 (s, C<sub>3</sub> or C<sub>16</sub> or C<sub>17</sub>), 23.44 (s, C<sub>11</sub> or C<sub>12</sub> or C<sub>13</sub>), 24.62 (s, C<sub>11</sub> or C<sub>12</sub> or C<sub>13</sub>), 26.14 (s, C<sub>3</sub> or C<sub>16</sub> or C<sub>17</sub>), 26.24 (s, C<sub>11</sub> or C<sub>12</sub> or C<sub>13</sub>), 26.94 (s, C<sub>8</sub> or C<sub>9</sub>), 27.80 (s, C<sub>11</sub> or C<sub>13</sub>), 27.96 (s, C<sub>8</sub> or C<sub>9</sub>), 28.38 (s, C<sub>2</sub> or C<sub>15</sub>), 30.77 (s, C<sub>2</sub> or C<sub>15</sub>), 32.44 (s, C<sub>10</sub> or C<sub>14</sub>), 33.41 (s, C<sub>10</sub> or C<sub>14</sub>), 37.98 (s, C<sub>1</sub>), 44.14 (s, C<sub>5</sub>), 49.16 (s, C<sub>6</sub>), 71.31 (s, C<sub>7</sub>), 123.15 (s, C<sub>20</sub> or C<sub>21</sub> or C<sub>22</sub>), 126.30 (s, C<sub>20</sub> or C<sub>21</sub> or C<sub>22</sub>), 126.91 (s, C<sub>20</sub> or C<sub>21</sub> or C<sub>22</sub>), 135.03 (s, C<sub>18</sub> or C<sub>19</sub> or C<sub>23</sub>), 142.46 (s, C<sub>18</sub> or C<sub>19</sub> or C<sub>23</sub>), 146.46 (s, C<sub>18</sub> or C<sub>19</sub> or C<sub>23</sub>). (Some assignments of the peaks were accomplished by the assistance of 2D spectra) HRMS (m/z): [M+H]<sup>+</sup> calcd. for C<sub>23</sub>H<sub>36</sub>BCIN, 372.26849; found 372.26728. **Elemental analysis:** calcd. for C<sub>23</sub>H<sub>35</sub>BCIN, C, 74.30; H, 9.49; N, 3.77; found, C, 74.58; H, 9.29; N, 3.67.

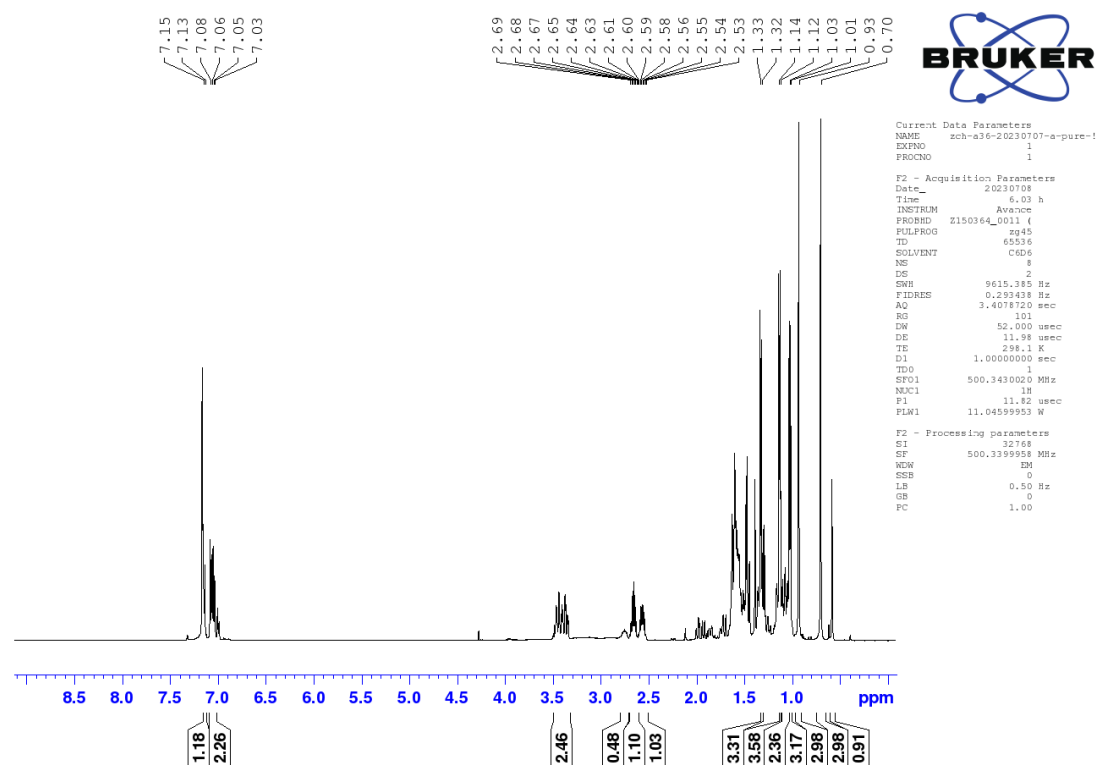

**Figure S27.** <sup>1</sup>H NMR spectrum of **5**<sup>Cl</sup> in C<sub>6</sub>D<sub>6</sub>. Only the signals belonging to the major isomer were labeled and integrated.

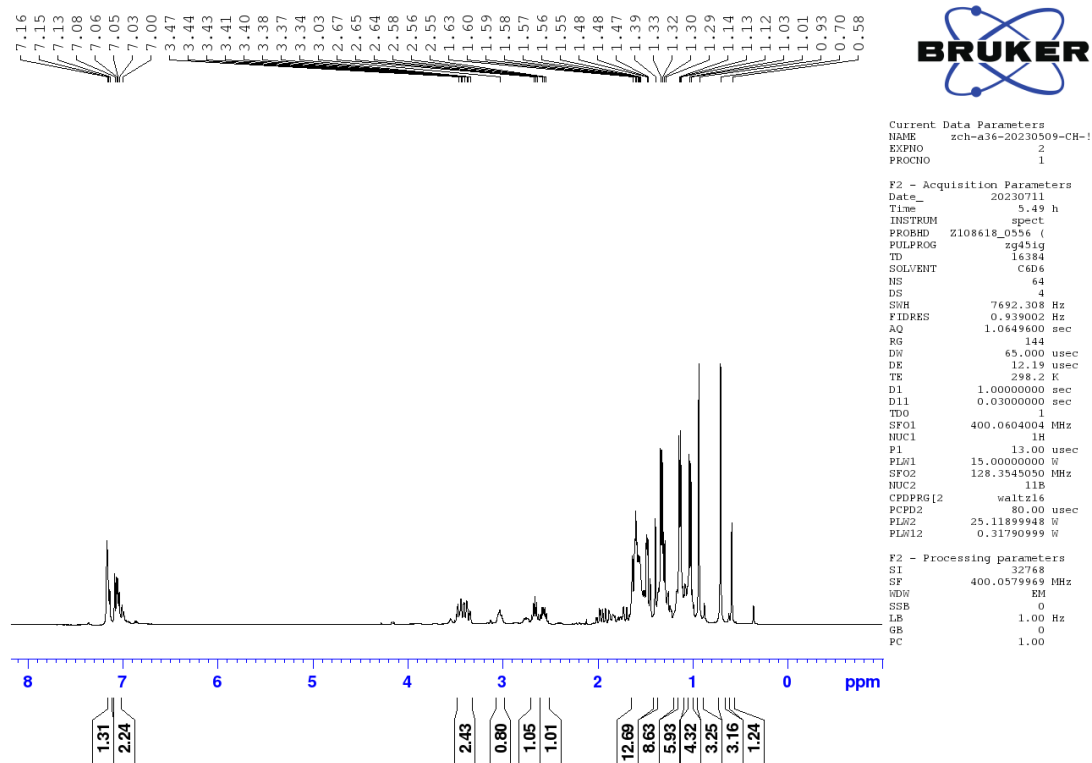

**Figure S28.**  $^1\text{H}\{^{11}\text{B}\}$  NMR spectrum of  $5^{\text{Cl}}$  in  $\text{C}_6\text{D}_6$ . Only the signals belonging to the major isomer were labeled and integrated.

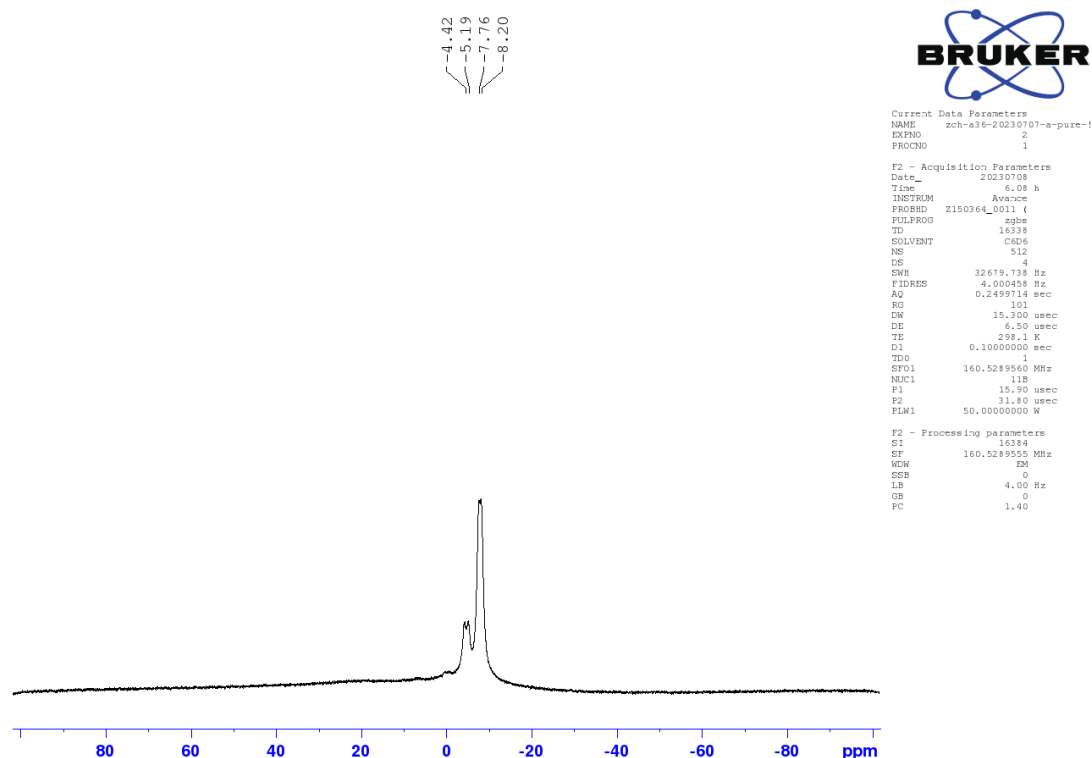

**Figure S29.**  $^{11}\text{B}$  NMR spectrum of  $5^{\text{Cl}}$  in  $\text{C}_6\text{D}_6$ .



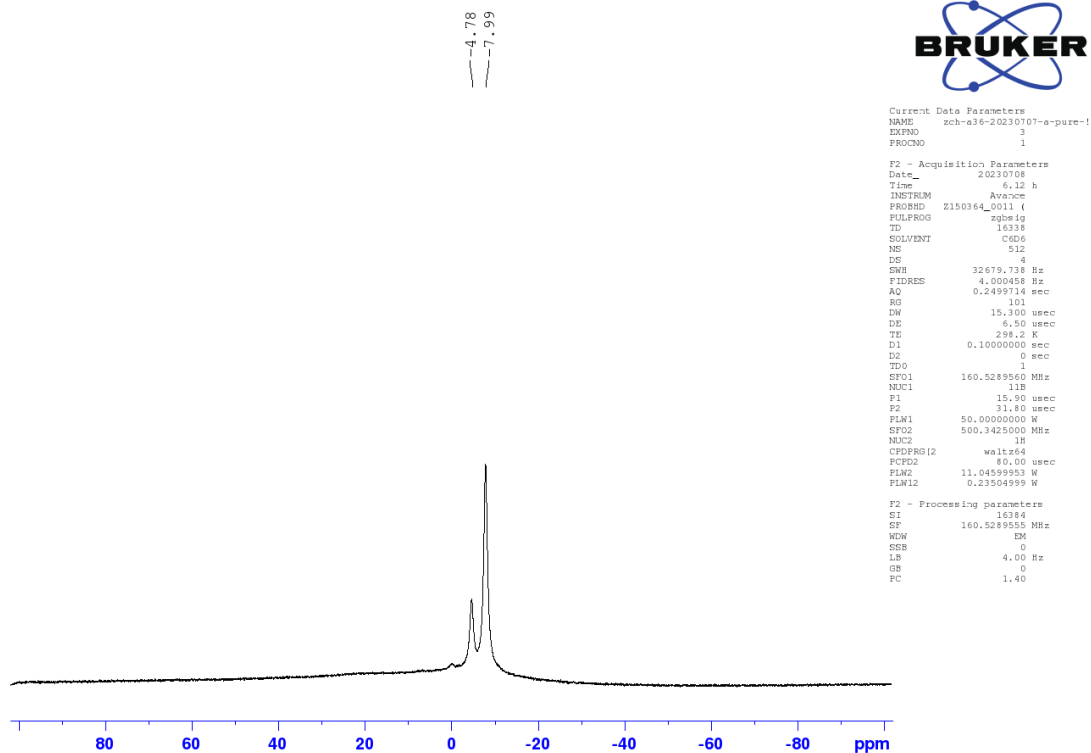

Figure S30.  $^{11}\text{B}\{^1\text{H}\}$  NMR spectrum of  $5^{\text{Cl}}$  in  $\text{C}_6\text{D}_6$ .

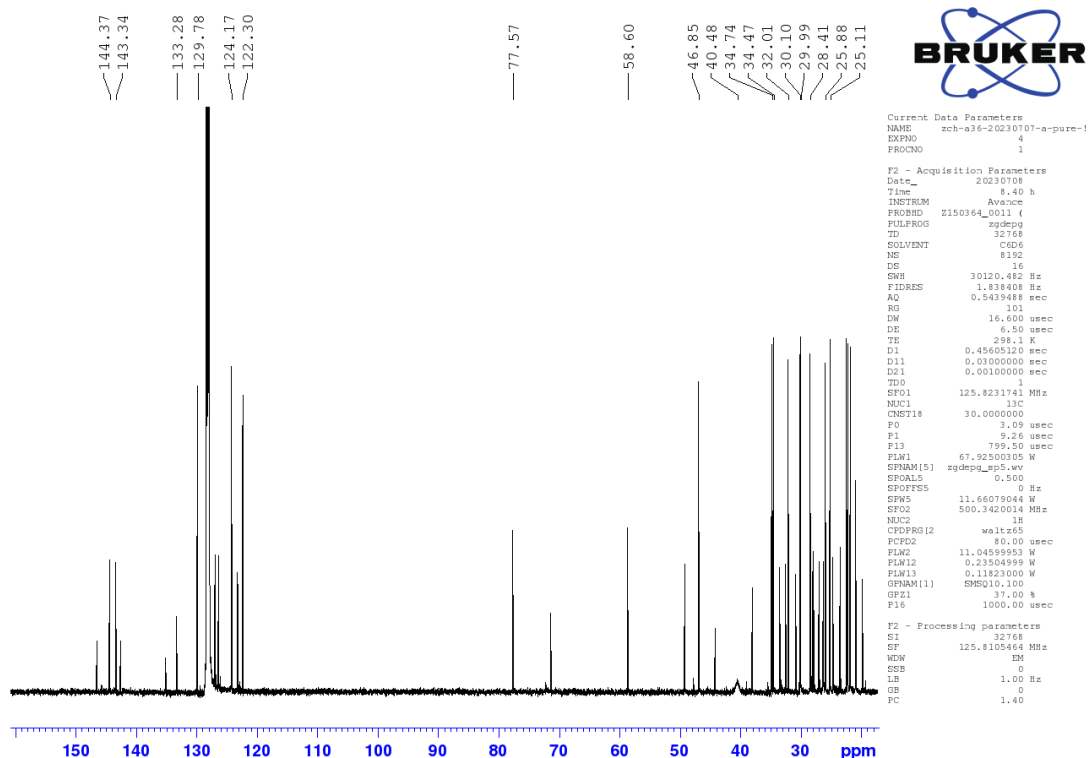

Figure S31.  $^{13}\text{C}\{^1\text{H}\}$  NMR spectrum of  $5^{\text{Cl}}$  in  $\text{C}_6\text{D}_6$ . Only the signals belonging to the major isomer were labeled.

**Heating 7 in toluene:** in a Schlenk tube, toluene (20 mL) was added to **7** (587 mg, 1.01 mmol) to form a yellow suspension. The suspension was stirred and heated at 110 °C for

18 hours. The yellow suspension gradually converted to a homogeneous solution. All volatiles in the solution were removed under reduced pressure, and the remaining solids were washed with hexanes (30 mL×2). The washed solids were dissolved in DCM (1 mL), and hexanes (1 mL) was slowly added. The solution was stored at –35 °C for 2 days and white solids precipitated from the solution. The mother liquid was removed by filtration and the solids were dried to afford compound **5<sup>Br</sup>** (142 mg, 34%) as a white powder. The two portions of 30 mL hexanes solution were combined and evaporated under vacuum. The remaining solids were sublimed at 100 °C, 250 mTorr for 4 hours. The remaining solids were dissolved in DCM (0.5 mL), added with hexanes (1.5 mL), and the mixture was stored at –35 °C for 2 days. The mother liquid was removed, and the remaining crystalline solids were dried under vacuum. The recrystallization process was repeated twice to afford compound **8** (overall yield: 15 mg, 3%).

**NMR yield determination:** in a Schlenk tube, toluene (1 mL) was added to **7** (28.9 mg, 0.05 mmol, 1.0 equiv) to form a yellow suspension. The suspension was stirred and heated at 110 °C for 18 hours. The yellow suspension gradually converted to a homogeneous solution. Acenaphthene (7.7 mg, 0.05 mmol, 1.0 equiv) was then added to the solution as an internal reference. All volatiles in the solution were removed under vacuum and the remaining solids were dissolved in deuterated DCM. The <sup>1</sup>H NMR spectrum suggested that the yield of **8**, **5<sup>Br</sup>** and C<sub>6</sub>Me<sub>6</sub> were 57%, 35% and 92%, respectively.

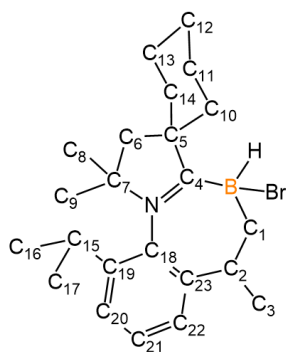

Major Isomer (85%):

**<sup>1</sup>H NMR** (500 MHz, C<sub>6</sub>D<sub>6</sub>): 0.67 (s, 3H, C<sub>8</sub>H<sub>3</sub> or C<sub>9</sub>H<sub>3</sub>), 0.92 (s, 3H, C<sub>8</sub>H<sub>3</sub> or C<sub>9</sub>H<sub>3</sub>), 1.00 (d, *J* = 6.7, 3H, C<sub>3</sub>H<sub>3</sub> or C<sub>16</sub>H<sub>3</sub> or C<sub>17</sub>H<sub>3</sub>), 1.07 (m, 2H, C<sub>11</sub>H<sub>2</sub> or C<sub>12</sub>H<sub>2</sub> or C<sub>13</sub>H<sub>2</sub>), 1.12 (d, *J* = 6.8, 3H, C<sub>3</sub>H<sub>3</sub> or C<sub>16</sub>H<sub>3</sub> or C<sub>17</sub>H<sub>3</sub>), 1.12 (m, 1H, C<sub>10</sub>H or C<sub>14</sub>H), 1.30 (m, 1H, C<sub>10</sub>H or C<sub>14</sub>H), 1.30 (d, *J* = 6.7, 3H, C<sub>3</sub>H<sub>3</sub> or C<sub>16</sub>H<sub>3</sub> or C<sub>17</sub>H<sub>3</sub>), 1.46 (1H, C<sub>6</sub>H), 1.56 (m, 2H, C<sub>11</sub>H<sub>2</sub> or C<sub>12</sub>H<sub>2</sub> or C<sub>13</sub>H<sub>2</sub>), 1.57 (d, *J* = 13.6, 1H, C<sub>6</sub>H), 1.61 (m, 2H, C<sub>11</sub>H<sub>2</sub> or C<sub>12</sub>H<sub>2</sub> or C<sub>13</sub>H<sub>2</sub>), 1.63 (m, 1H, C<sub>1</sub>H), 1.73 (m, 1H, C<sub>1</sub>H), 2.52 (sept, *J* = 6.7, 1H, C<sub>2</sub>H or C<sub>15</sub>H), 2.64 (sept, *J* = 6.7, 1H, C<sub>2</sub>H or C<sub>15</sub>H), 3.01 (br. s, 1H, BH), 3.48 (td, *J* = 13.2, *J* = 3.5, 1H, C<sub>10</sub>H or C<sub>14</sub>H), 3.56 (td, *J* = 13.4, *J* = 4.0 1H, C<sub>10</sub>H or C<sub>14</sub>H), 7.04 (m, 1H, C<sub>20</sub>H or C<sub>21</sub>H or C<sub>22</sub>H), 7.04 (m, 1H, C<sub>20</sub>H or C<sub>21</sub>H or C<sub>22</sub>H), 7.13 (m, 1H, C<sub>20</sub>H or C<sub>21</sub>H or C<sub>22</sub>H); **<sup>1</sup>H{<sup>11</sup>B} NMR** (400 MHz, C<sub>6</sub>D<sub>6</sub>): 0.67 (s, 3H, C<sub>8</sub>H<sub>3</sub> or C<sub>9</sub>H<sub>3</sub>), 0.92 (s, 3H, C<sub>8</sub>H<sub>3</sub> or C<sub>9</sub>H<sub>3</sub>), 1.00 (d, *J* = 6.7, 3H, C<sub>3</sub>H<sub>3</sub> or C<sub>16</sub>H<sub>3</sub> or C<sub>17</sub>H<sub>3</sub>), 1.07 (m, 2H, C<sub>11</sub>H<sub>2</sub> or C<sub>12</sub>H<sub>2</sub> or C<sub>13</sub>H<sub>2</sub>), 1.12 (d, *J* = 6.8, 3H, C<sub>3</sub>H<sub>3</sub> or C<sub>16</sub>H<sub>3</sub> or C<sub>17</sub>H<sub>3</sub>), 1.12 (m, 1H, C<sub>10</sub>H or C<sub>14</sub>H), 1.30 (m, 1H, C<sub>10</sub>H or C<sub>14</sub>H), 1.30 (d, *J* = 6.7, 3H, C<sub>3</sub>H<sub>3</sub> or C<sub>16</sub>H<sub>3</sub> or C<sub>17</sub>H<sub>3</sub>), 1.46 (1H, C<sub>6</sub>H), 1.56 (m, 2H, C<sub>11</sub>H<sub>2</sub> or C<sub>12</sub>H<sub>2</sub> or C<sub>13</sub>H<sub>2</sub>), 1.57 (d, *J* = 13.6, 1H,

C<sub>6</sub>H), 1.61 (m, 2H, C<sub>11</sub>H<sub>2</sub> or C<sub>12</sub>H<sub>2</sub> or C<sub>13</sub>H<sub>2</sub>), 1.63 (m, 1H, C<sub>1</sub>H), 1.73 (m, 1H, C<sub>1</sub>H), 2.52 (sept, *J* = 6.7, 1H, C<sub>2</sub>H or C<sub>15</sub>H), 2.64 (sept, *J* = 6.7, 1H, C<sub>2</sub>H or C<sub>15</sub>H), 3.07 (t, *J* = 8.4 1H, BH), 3.48 (td, *J* = 13.2, *J* = 3.5, 1H, C<sub>10</sub>H or C<sub>14</sub>H), 3.56 (td, *J* = 13.4, *J* = 4.0 1H, C<sub>10</sub>H or C<sub>14</sub>H), 7.04 (m, 1H, C<sub>20</sub>H or C<sub>21</sub>H or C<sub>22</sub>H), 7.04 (m, 1H, C<sub>20</sub>H or C<sub>21</sub>H or C<sub>22</sub>H), 7.13 (m, 1H, C<sub>20</sub>H or C<sub>21</sub>H or C<sub>22</sub>H); **<sup>11</sup>B NMR** (161 MHz, C<sub>6</sub>D<sub>6</sub>): -10.73 (br. s, FWHM = 353.9 Hz); **<sup>11</sup>B{<sup>1</sup>H} NMR** (161 MHz, C<sub>6</sub>D<sub>6</sub>): -10.59 (br. s, FWHM = 205.9 Hz); **<sup>13</sup>C{<sup>1</sup>H} NMR** (126 MHz, C<sub>6</sub>D<sub>6</sub>): 20.66 (s, C<sub>3</sub> or C<sub>16</sub> or C<sub>17</sub>), 21.74 (s, C<sub>3</sub> or C<sub>16</sub> or C<sub>17</sub>), 22.19 (s, C<sub>11</sub> or C<sub>12</sub> or C<sub>13</sub>), 22.35 (s, C<sub>11</sub> or C<sub>12</sub> or C<sub>13</sub>), 25.00 (s, C<sub>11</sub> or C<sub>12</sub> or C<sub>13</sub>), 25.79 (s, C<sub>3</sub> or C<sub>16</sub> or C<sub>17</sub>), 28.42 (s, C<sub>8</sub> or C<sub>9</sub>), 29.95 (s, C<sub>8</sub> or C<sub>9</sub>), 30.11 (s, C<sub>2</sub> or C<sub>15</sub>), 32.07 (s, C<sub>10</sub> or C<sub>14</sub>), 34.93 (s, C<sub>2</sub> or C<sub>15</sub>), 35.02 (s, C<sub>10</sub> or C<sub>14</sub>), 40.37 (br. s, C<sub>1</sub>), 47.01 (s, C<sub>6</sub>), 58.80 (s, C<sub>5</sub>), 77.57 (s, C<sub>7</sub>), 122.34 (s, C<sub>20</sub> or C<sub>21</sub> or C<sub>22</sub>), 124.28 (s, C<sub>20</sub> or C<sub>21</sub> or C<sub>22</sub>), 129.88 (s, C<sub>20</sub> or C<sub>21</sub> or C<sub>22</sub>), 133.29 (s, C<sub>18</sub> or C<sub>19</sub> or C<sub>23</sub>), 143.27 (s, C<sub>18</sub> or C<sub>19</sub> or C<sub>23</sub>), 143.96 (s, C<sub>18</sub> or C<sub>19</sub> or C<sub>23</sub>). (Some assignments of the peaks were accomplished by the assistance of 2D spectra)  
 Minor Isomer (15%): most of the peaks are hard to identify.  
**<sup>11</sup>B NMR** (161 MHz, C<sub>6</sub>D<sub>6</sub>): -5.38 (br. s); **<sup>11</sup>B{<sup>1</sup>H} NMR** (161 MHz, C<sub>6</sub>D<sub>6</sub>): -5.47 (br. s).  
**HRMS** (m/z): [M]<sup>+</sup> calcd. for C<sub>23</sub>H<sub>35</sub>BBrN, 415.20459; found 415.20369.

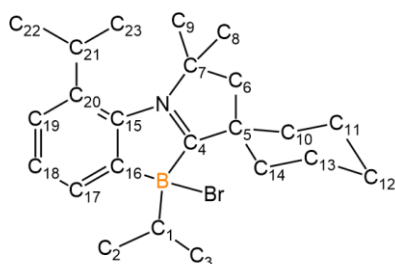

**<sup>1</sup>H NMR** (500 MHz, C<sub>6</sub>D<sub>6</sub>): 0.77 (d, *J* = 6.9, 3H, C<sub>2</sub>H<sub>3</sub> or C<sub>3</sub>H<sub>3</sub>), 0.98 (1H, C<sub>11</sub>H or C<sub>12</sub>H or C<sub>13</sub>H), 1.00 (1H, C<sub>11</sub>H or C<sub>12</sub>H or C<sub>13</sub>H), 1.06 (d, *J* = 6.9, 3H, C<sub>22</sub>H<sub>3</sub> or C<sub>23</sub>H<sub>3</sub>), 1.09 (d, *J* = 6.9, 3H, C<sub>2</sub>H<sub>3</sub> or C<sub>3</sub>H<sub>3</sub>), 1.16 (1H, C<sub>11</sub>H or C<sub>12</sub>H or C<sub>13</sub>H), 1.17 (s, 3H, C<sub>8</sub>H<sub>3</sub> or C<sub>9</sub>H<sub>3</sub>), 1.28 (s, 3H, C<sub>8</sub>H<sub>3</sub> or C<sub>9</sub>H<sub>3</sub>), 1.40 (m, 1H, C<sub>10</sub>H or C<sub>14</sub>H), 1.45 (1H, C<sub>11</sub>H or C<sub>12</sub>H or C<sub>13</sub>H), 1.49 (1H, C<sub>11</sub>H or C<sub>12</sub>H or C<sub>13</sub>H), 1.51 (1H, C<sub>11</sub>H or C<sub>12</sub>H or C<sub>13</sub>H), 1.74 (d, *J* = 6.8, 3H, C<sub>2</sub>H<sub>3</sub> or C<sub>3</sub>H<sub>3</sub>), 1.78 (m, 1H, C<sub>10</sub>H or C<sub>14</sub>H), 1.78 (1H, C<sub>6</sub>H), 1.82 (1H, C<sub>6</sub>H), 2.26 (td, *J* = 13.4, *J* = 3.2, 1H, C<sub>10</sub>H or C<sub>14</sub>H), 2.86 (td, *J* = 13.9, *J* = 3.6, 1H, C<sub>10</sub>H or C<sub>14</sub>H), 3.27 (sept, *J* = 6.8, 1H, C<sub>21</sub>H), 7.02 (dd, *J* = 7.8, *J* = 1.3, 1H, C<sub>19</sub>H), 7.18 (m, 1H, C<sub>18</sub>H), 7.86 (d, *J* = 6.6, 1H, C<sub>17</sub>H); **<sup>11</sup>B NMR** (161 MHz, C<sub>6</sub>D<sub>6</sub>): -4.71 (s); **<sup>13</sup>C{<sup>1</sup>H} NMR** (126 MHz, C<sub>6</sub>D<sub>6</sub>): 20.31 (s, C<sub>2</sub> or C<sub>3</sub>), 21.41 (s, C<sub>2</sub> or C<sub>3</sub>), 22.15 (s, C<sub>11</sub> or C<sub>12</sub> or C<sub>13</sub>), 22.44 (s, C<sub>11</sub> or C<sub>12</sub> or C<sub>13</sub>), 23.70 (s, C<sub>22</sub> or C<sub>23</sub>), 24.81 (s, C<sub>22</sub> or C<sub>23</sub>), 25.37 (s, C<sub>11</sub> or C<sub>12</sub> or C<sub>13</sub>), 27.67 (s, C<sub>8</sub> or C<sub>9</sub>), 29.32 (s, C<sub>8</sub> or C<sub>9</sub>), 29.45 (s, C<sub>21</sub>), 33.81 (s, C<sub>10</sub> or C<sub>14</sub>), 38.15 (s, C<sub>10</sub> or C<sub>14</sub>), 52.66 (s, C<sub>5</sub>), 53.85 (s, C<sub>6</sub>), 70.87 (s, C<sub>7</sub>), 125.89 (s, C<sub>19</sub>), 128.35 (s, C<sub>18</sub>), 130.70 (s, C<sub>17</sub>), 134.69 (s, C<sub>15</sub> or C<sub>20</sub>), 141.26 (s, C<sub>15</sub> or C<sub>20</sub>). (Some assignments of the peaks were accomplished by the assistance of 2D spectra) **HRMS** (m/z): [M+H]<sup>+</sup> calcd. for C<sub>23</sub>H<sub>36</sub>BBrN, 416.21240; found 416.21000.

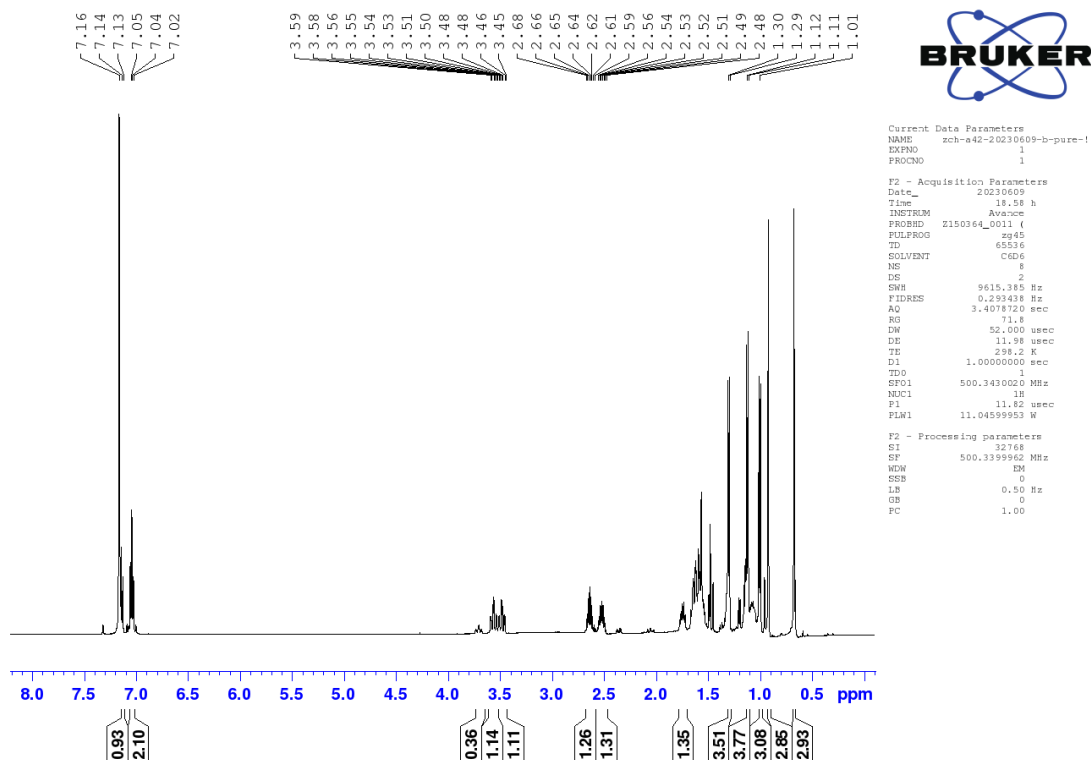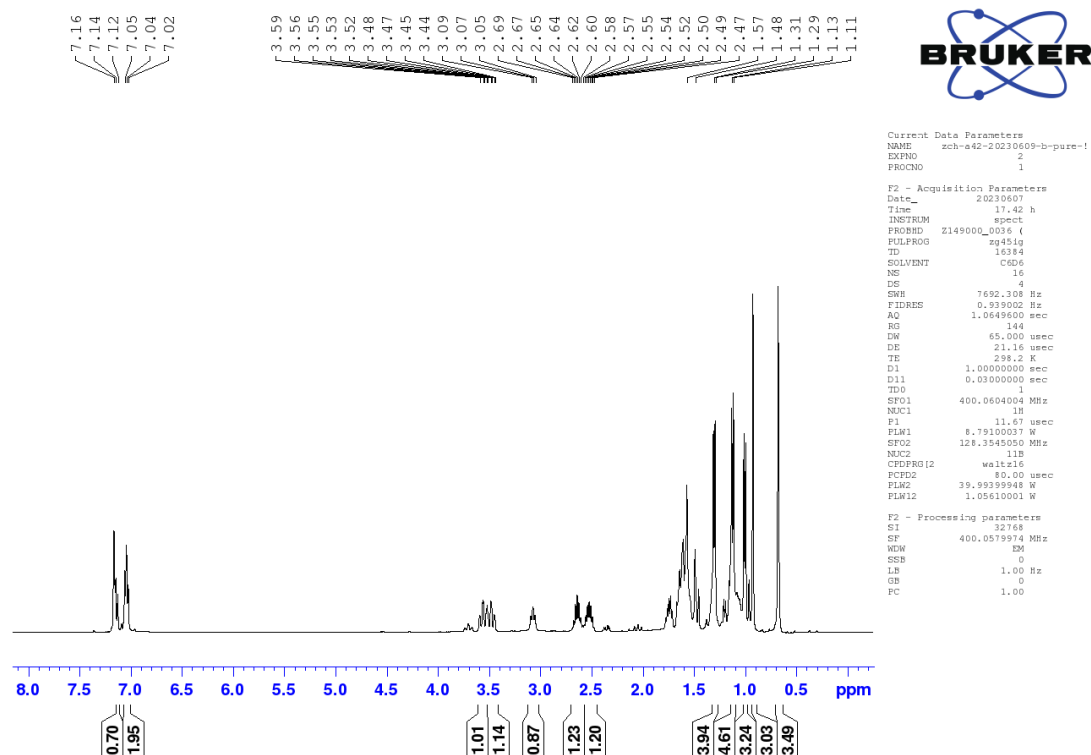

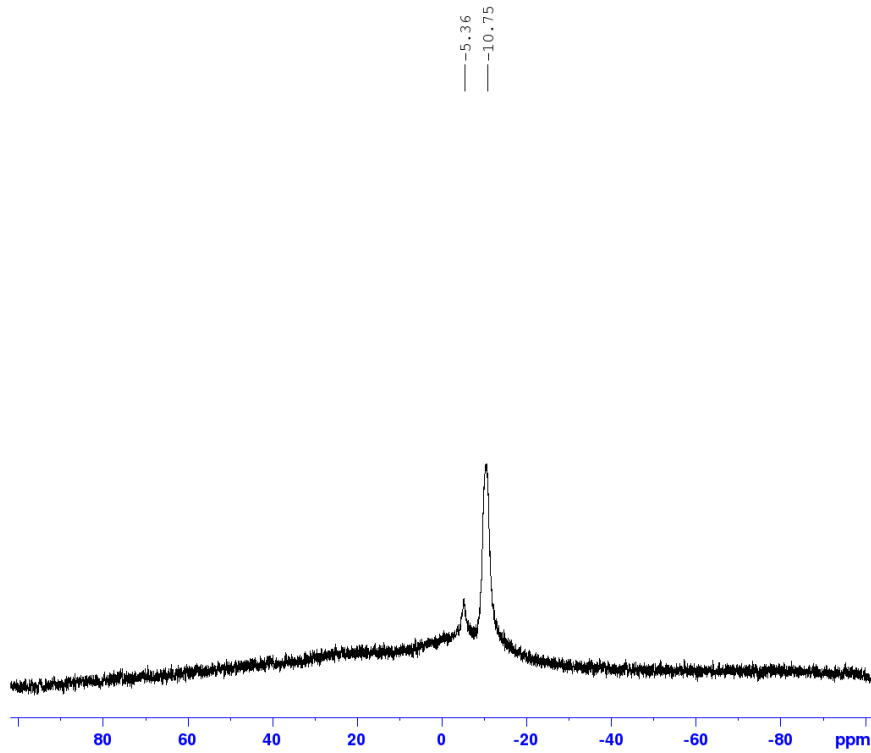

Figure S34.  $^{11}\text{B}$  NMR spectrum of  $5^{\text{Br}}$  in  $\text{C}_6\text{D}_6$ .

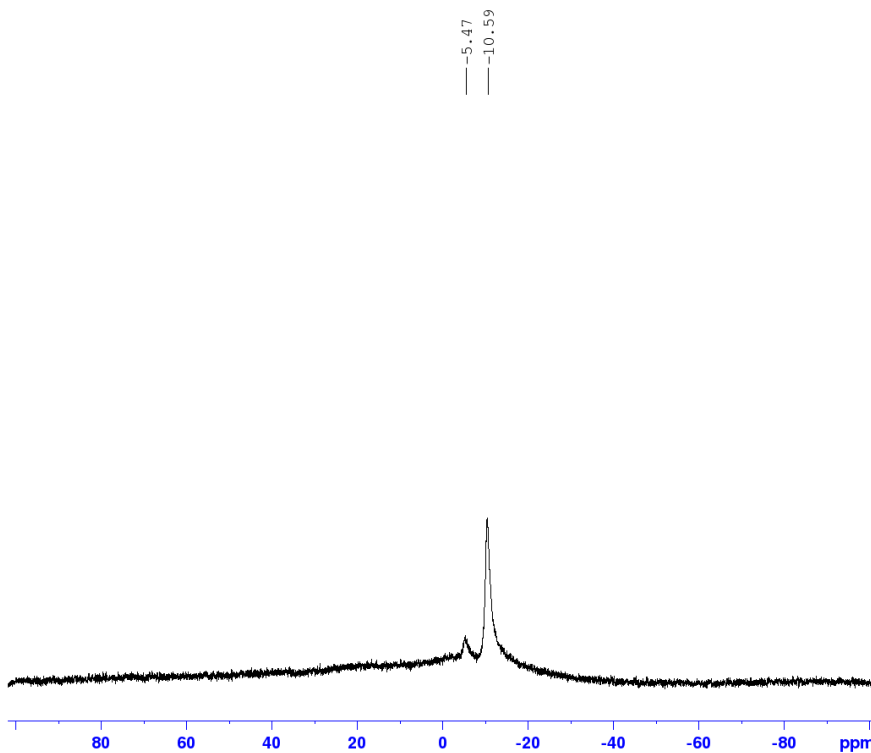

Figure S35.  $^{11}\text{B}\{^1\text{H}\}$  NMR spectrum of  $5^{\text{Br}}$  in  $\text{C}_6\text{D}_6$ .

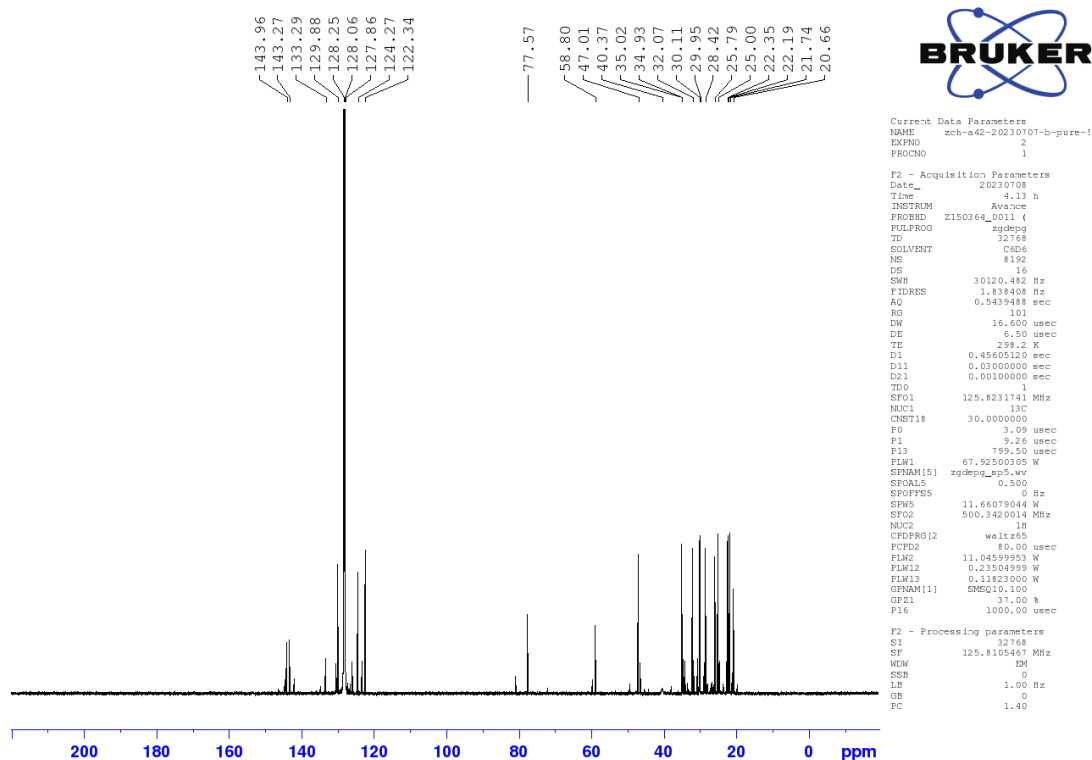

Figure S36.  $^{13}\text{C}\{^1\text{H}\}$  NMR spectrum of  $5^{\text{Br}}$  in  $\text{C}_6\text{D}_6$ . Only the signals belonging to the major isomer were labeled.

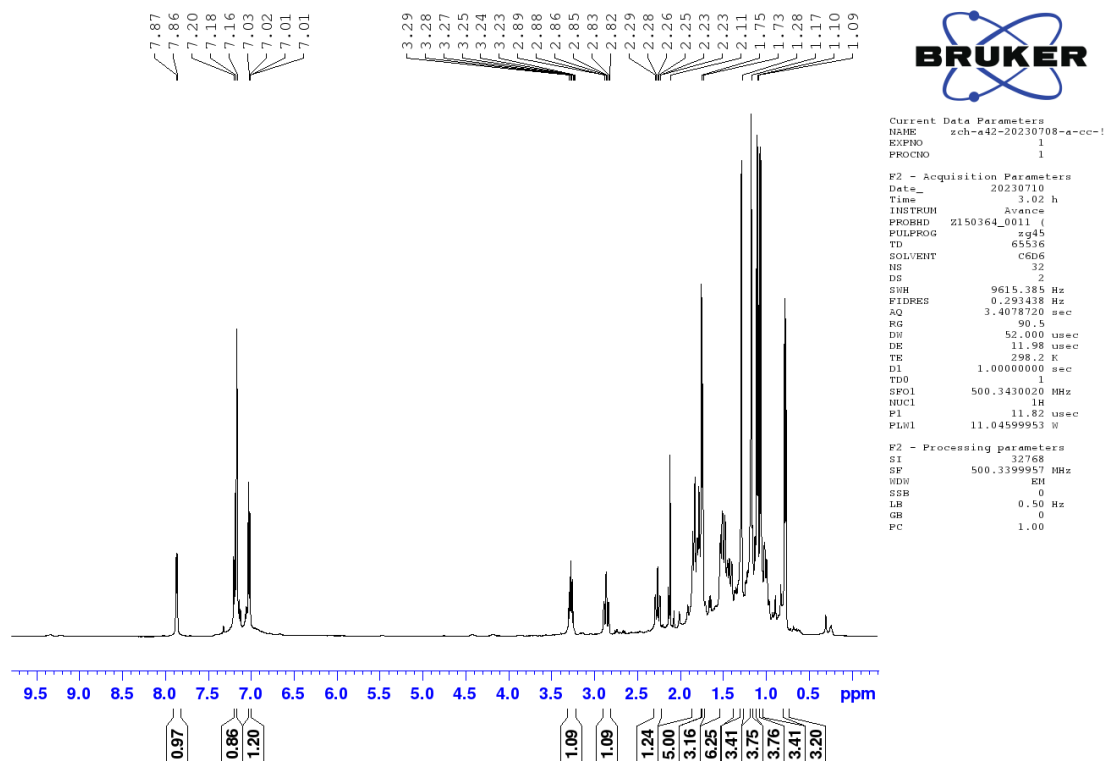

Figure S37.  $^1\text{H}$  NMR spectrum of  $8$  in  $\text{C}_6\text{D}_6$ .

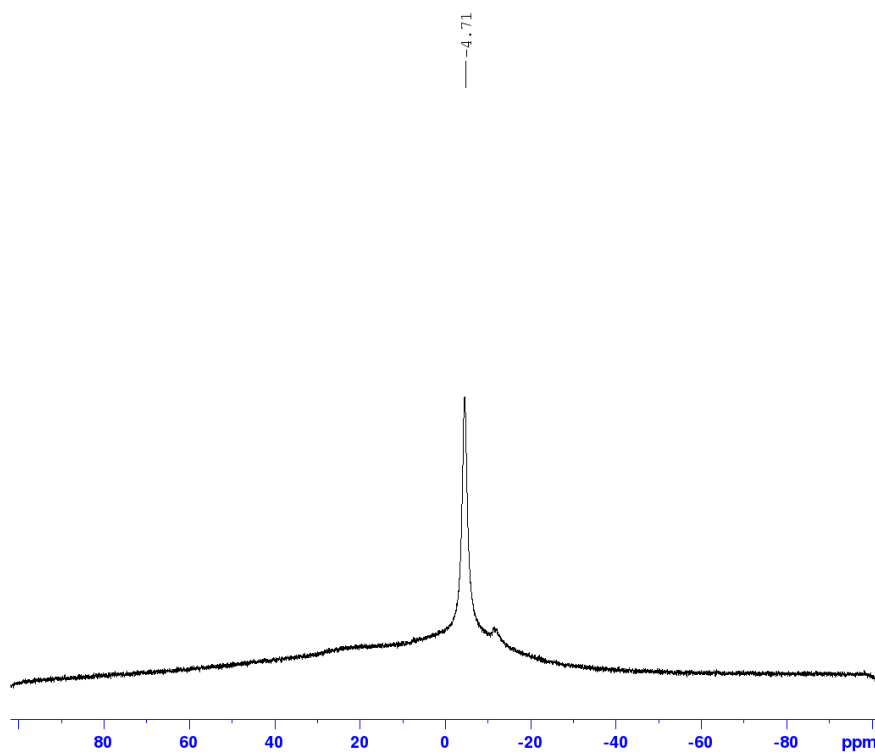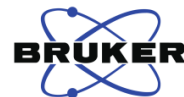

```

Current Data Parameters
NAME      zch-a42-20230708-a-cc-1
EXPNO    2
PROCNO   1

F2 - Acquisition Parameters
Date_    20230710
Time     3.07 h
INSTRUM  Avance
PROBHD   Z150364_0011 (
PULPROG  zgpg
TD        16538
SOLVENT  C6D6
NS        512
DS        4
SWH       32679.738 Hz
FIDRES    4.000458 Hz
AQ        0.2499714 sec
RG        101
DN        15.300 usec
DE        6.50 usec
TE        298.1 K
D1        0.10000000 sec
TD0       1
SF01      160.5289560 MHz
NUC1      11B
P1        15.90 usec
P2        31.80 usec
PLW1     50.00000000 W

F2 - Processing parameters
SI        16384
SF        160.528955 MHz
WDW       EM
SSB       0
LB        4.00 Hz
GB        0
PC        1.40
  
```

Figure S38.  $^{11}\text{B}$  NMR spectrum of **8** in  $\text{C}_6\text{D}_6$ .

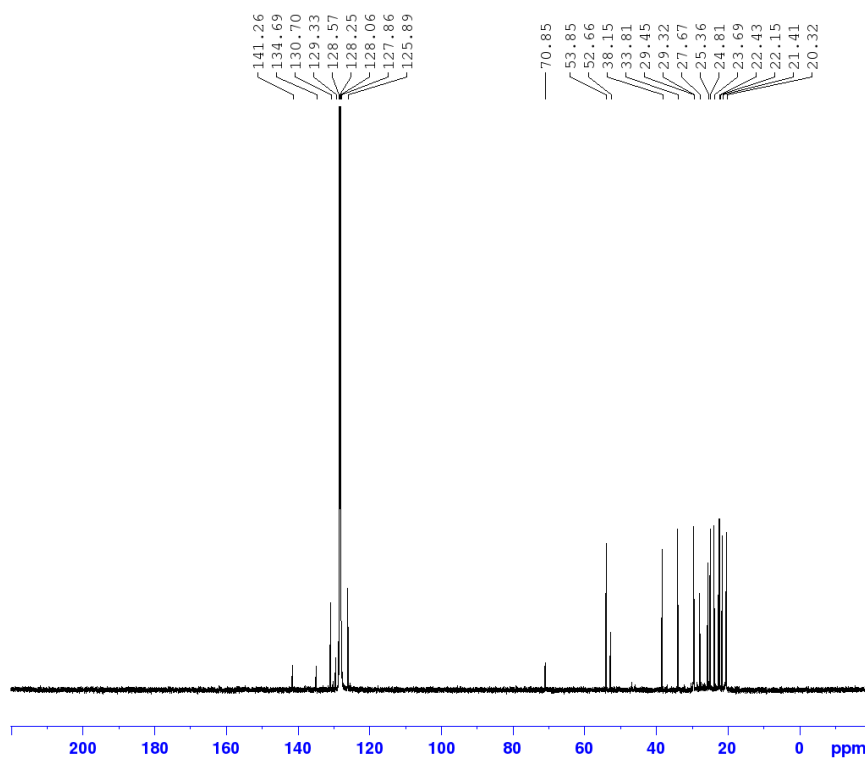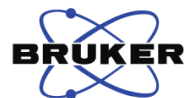

```

Current Data Parameters
NAME      zch-a42-20230708-a-cc-1
EXPNO    3
PROCNO   1

F2 - Acquisition Parameters
Date_    20230710
Time     5.34 h
INSTRUM  Avance
PROBHD   Z150364_0011 (
PULPROG  zgpgpg
TD        32768
SOLVENT  C6D6
NS        8192
DS        16
SWH       30120.482 Hz
FIDRES    1.838408 Hz
AQ        0.5439488 sec
RG        101
DN        16.600 usec
DE        6.50 usec
TE        298.2 K
D1        0.45605120 sec
D11       0.03000000 sec
D21       0.00100000 sec
TD0       1
SF01      125.8231741 MHz
NUC1      13C
CNST18   30.0000000
P0        3.09 usec
P1        8.25 usec
P13       799.50 usec
PLW1     67.92500305 W
SFRM[5]  zgpgpg5.vv
SFOAL5    0.500
SPOFF55  0 Hz
SPW5     11.66079044 W
SPW2     500.3420014 MHz
NUC2      1H
OPDPRG[2] waltz65
PCPDZ    80.00 usec
PLW2     11.04599953 W
PLW12    0.23504999 W
PLW13    0.11823000 W
GPMHM[1] SMSQ10.100
GPZ1     37.00 k
P16      1000.00 usec

F2 - Processing parameters
SI        32768
SF        125.8105465 MHz
WDW       EM
SSB       0
LB        1.00 Hz
GB        0
PC        1.40
  
```

Figure S39.  $^{13}\text{C}\{^1\text{H}\}$  NMR spectrum of **8** in  $\text{C}_6\text{D}_6$ .

**Heating 7 in DCM (or o-difluorobenzene):** in a Schlenk tube, **7** (172 mg, 0.29 mmol) was dissolved in DCM (10 mL). The solution was stirred and heated at 50 °C overnight. All volatiles in the solution were removed under reduced pressure, and the remaining solids

were recrystallized in DCM/hexanes at  $-35\text{ }^{\circ}\text{C}$ , affording compound **11** as a white solid (87.1 mg, 52%). This reaction was also conducted using *o*-difluorobenzene as solvent instead of DCM. The reaction was heated at  $85\text{ }^{\circ}\text{C}$  for 2 days, and the isolated yield improved from 52% to 73%.

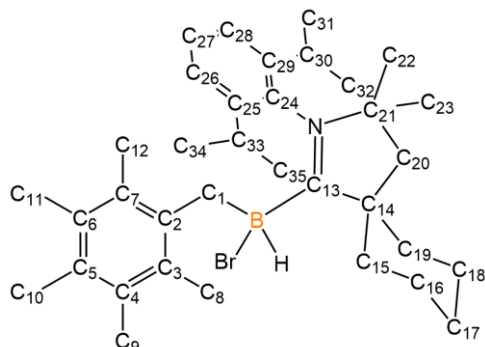

**$^1\text{H NMR}$**  (500 MHz,  $\text{C}_6\text{D}_6$ ): 0.80 (br. s, 3H,  $\text{C}_{22}\text{H}_3$  or  $\text{C}_{23}\text{H}_3$ ), 1.01 (br. s, 3H,  $\text{C}_{22}\text{H}_3$  or  $\text{C}_{23}\text{H}_3$ ), 1.08 (6H,  $\text{C}_{31}\text{H}_3$  and  $\text{C}_{32}\text{H}_3$ , or  $\text{C}_{34}\text{H}_3$  and  $\text{C}_{35}\text{H}_3$ ), 1.33 (6H,  $\text{C}_{31}\text{H}_3$  and  $\text{C}_{32}\text{H}_3$ , or  $\text{C}_{34}\text{H}_3$  and  $\text{C}_{35}\text{H}_3$ ), 1.59 (m, 1H,  $\text{C}_{20}\text{H}$ ), 1.77 (m, 1H,  $\text{C}_{20}\text{H}$ ), 2.16 (s, 3H,  $\text{C}_{10}\text{H}_3$ ), 2.19 (6H,  $\text{C}_8\text{H}_3$  and  $\text{C}_{12}\text{H}_3$ , or  $\text{C}_9\text{H}_3$  and  $\text{C}_{11}\text{H}_3$ ), 2.16 (s, 3H,  $\text{C}_{10}\text{H}_3$ ), 2.19 (1H,  $\text{C}_1\text{H}$ ), 2.56 (1H,  $\text{C}_1\text{H}$ ), 2.57 (s, 6H,  $\text{C}_8\text{H}_3$  and  $\text{C}_{12}\text{H}_3$ , or  $\text{C}_9\text{H}_3$  and  $\text{C}_{11}\text{H}_3$ ), 2.69 (m, 1H,  $\text{C}_{30}\text{H}$  or  $\text{C}_{34}\text{H}$ ), 3.19 (m, 1H,  $\text{C}_{30}\text{H}$  or  $\text{C}_{34}\text{H}$ ), 7.00 (m, 1H,  $\text{C}_{26}\text{H}$  or  $\text{C}_{27}\text{H}$  or  $\text{C}_{28}\text{H}$ ), 7.02 (m, 1H,  $\text{C}_{26}\text{H}$  or  $\text{C}_{27}\text{H}$  or  $\text{C}_{28}\text{H}$ ), 7.08 (m, 1H,  $\text{C}_{26}\text{H}$  or  $\text{C}_{27}\text{H}$  or  $\text{C}_{28}\text{H}$ ),  $\text{C}_{15}\text{H}_2$ - $\text{C}_{19}\text{H}_2$ : 1.22 (br. m), 1.47 (br. m), 1.60 (br. m), 1.76 (br. m), 2.33 (br. m), 2.42 (br. m), 2.53 (br. m), 3.03 (br. m), 3.12 (br. m);  **$^1\text{H}\{^{11}\text{B}\}$  NMR** (400 MHz,  $\text{C}_6\text{D}_6$ ): 0.80 (br. s, 3H,  $\text{C}_{22}\text{H}_3$  or  $\text{C}_{23}\text{H}_3$ ), 1.01 (br. s, 3H,  $\text{C}_{22}\text{H}_3$  or  $\text{C}_{23}\text{H}_3$ ), 1.08 (6H,  $\text{C}_{31}\text{H}_3$  and  $\text{C}_{32}\text{H}_3$ , or  $\text{C}_{34}\text{H}_3$  and  $\text{C}_{35}\text{H}_3$ ), 1.33 (6H,  $\text{C}_{31}\text{H}_3$  and  $\text{C}_{32}\text{H}_3$ , or  $\text{C}_{34}\text{H}_3$  and  $\text{C}_{35}\text{H}_3$ ), 1.59 (m, 1H,  $\text{C}_{20}\text{H}$ ), 1.77 (m, 1H,  $\text{C}_{20}\text{H}$ ), 2.16 (s, 3H,  $\text{C}_{10}\text{H}_3$ ), 2.19 (6H,  $\text{C}_8\text{H}_3$  and  $\text{C}_{12}\text{H}_3$ , or  $\text{C}_9\text{H}_3$  and  $\text{C}_{11}\text{H}_3$ ), 2.16 (s, 3H,  $\text{C}_{10}\text{H}_3$ ), 2.19 (1H,  $\text{C}_1\text{H}$ ), 2.56 (1H,  $\text{C}_1\text{H}$ ), 2.57 (s, 6H,  $\text{C}_8\text{H}_3$  and  $\text{C}_{12}\text{H}_3$ , or  $\text{C}_9\text{H}_3$  and  $\text{C}_{11}\text{H}_3$ ), 2.69 (m, 1H,  $\text{C}_{30}\text{H}$  or  $\text{C}_{34}\text{H}$ ), 3.05 (m, 1H,  $\text{BH}$ ), 3.19 (m, 1H,  $\text{C}_{30}\text{H}$  or  $\text{C}_{34}\text{H}$ ), 7.00 (m, 1H,  $\text{C}_{26}\text{H}$  or  $\text{C}_{27}\text{H}$  or  $\text{C}_{28}\text{H}$ ), 7.02 (m, 1H,  $\text{C}_{26}\text{H}$  or  $\text{C}_{27}\text{H}$  or  $\text{C}_{28}\text{H}$ ), 7.08 (m, 1H,  $\text{C}_{26}\text{H}$  or  $\text{C}_{27}\text{H}$  or  $\text{C}_{28}\text{H}$ ),  $\text{C}_{15}\text{H}_2$ - $\text{C}_{19}\text{H}_2$ : 1.22 (br. m), 1.47 (br. m), 1.60 (br. m), 1.76 (br. m), 2.33 (br. m), 2.42 (br. m), 2.53 (br. m), 3.03 (br. m), 3.12 (br. m);  **$^{11}\text{B NMR}$**  (161 MHz,  $\text{C}_6\text{D}_6$ ):  $-8.03$  (s);  **$^{11}\text{B}\{^1\text{H}\}$  NMR** (161 MHz,  $\text{C}_6\text{D}_6$ ):  $-8.06$  (s);  **$^{13}\text{C}\{^1\text{H}\}$  NMR** (126 MHz,  $\text{C}_6\text{D}_6$ ): 17.10 (s,  $\text{C}_{10}$ ), 17.40 (s,  $\text{C}_8$  and  $\text{C}_{12}$ , or  $\text{C}_9$  and  $\text{C}_{11}$ ), 18.89 (s,  $\text{C}_8$  and  $\text{C}_{12}$ , or  $\text{C}_9$  and  $\text{C}_{11}$ ), 17.10 (s,  $\text{C}_{10}$ ), 23.42 (br. s,  $\text{C}_{31}$  or  $\text{C}_{32}$  or  $\text{C}_{34}$  or  $\text{C}_{35}$ ), 24.77 (br. s,  $\text{C}_{31}$  or  $\text{C}_{32}$  or  $\text{C}_{34}$  or  $\text{C}_{35}$ ), 26.05 (br. s,  $\text{C}_{31}$  or  $\text{C}_{32}$  or  $\text{C}_{34}$  or  $\text{C}_{35}$ ), 26.99 (br. s,  $\text{C}_{22}$  or  $\text{C}_{23}$ ), 28.26 (br. s,  $\text{C}_{31}$  or  $\text{C}_{32}$  or  $\text{C}_{34}$  or  $\text{C}_{35}$ ), 28.87 (br. s,  $\text{C}_{30}$  or  $\text{C}_{33}$ ), 29.36 (br. s,  $\text{C}_{30}$  or  $\text{C}_{33}$ ), 30.55 (br. s,  $\text{C}_{22}$  or  $\text{C}_{23}$ ), 45.96 (s,  $\text{C}_{20}$ ), 59.89 (s,  $\text{C}_{14}$ ), 77.38 (s,  $\text{C}_{21}$ ), 124.34 (br. s,  $\text{C}_{26}$  or  $\text{C}_{27}$  or  $\text{C}_{28}$ ), 126.15 (br. s,  $\text{C}_{26}$  or  $\text{C}_{27}$  or  $\text{C}_{28}$ ), 129.26 (s,  $\text{C}_5$ ), 129.66 (s,  $\text{C}_{26}$  or  $\text{C}_{27}$  or  $\text{C}_{28}$ ), 131.39 (s,  $\text{C}_3$  and  $\text{C}_7$ , or  $\text{C}_4$  and  $\text{C}_6$ ), 131.83 (s,  $\text{C}_3$  and  $\text{C}_7$ , or  $\text{C}_4$  and  $\text{C}_6$ ), 133.89 (s,  $\text{C}_{24}$  or  $\text{C}_{25}$  or  $\text{C}_{29}$ ), 139.95 (s,  $\text{C}_1$ ), 144.64 (s,  $\text{C}_{24}$  or  $\text{C}_{25}$  or  $\text{C}_{29}$ ), 147.47 (s,  $\text{C}_{24}$  or  $\text{C}_{25}$  or  $\text{C}_{29}$ ),  $\text{C}_{15}$ - $\text{C}_{19}$ : 22.49 (br. s), 23.62 (br. s), 25.65 (s), 35.49 (br. s), 39.63 (br. s). (Some assignments of the peaks were accomplished by the assistance of 2D spectra) **HRMS** ( $m/z$ ):  $[\text{M}+\text{H}]^+$  calcd. for  $\text{C}_{35}\text{H}_{54}\text{BBrN}$ , 578.35326; found 578.35728. **Elemental analysis**: calcd. for  $\text{C}_{35}\text{H}_{53}\text{BBrN}$ , C, 72.66; H, 9.23; N, 2.42; found: C, 72.79; H, 9.08; N, 2.17.



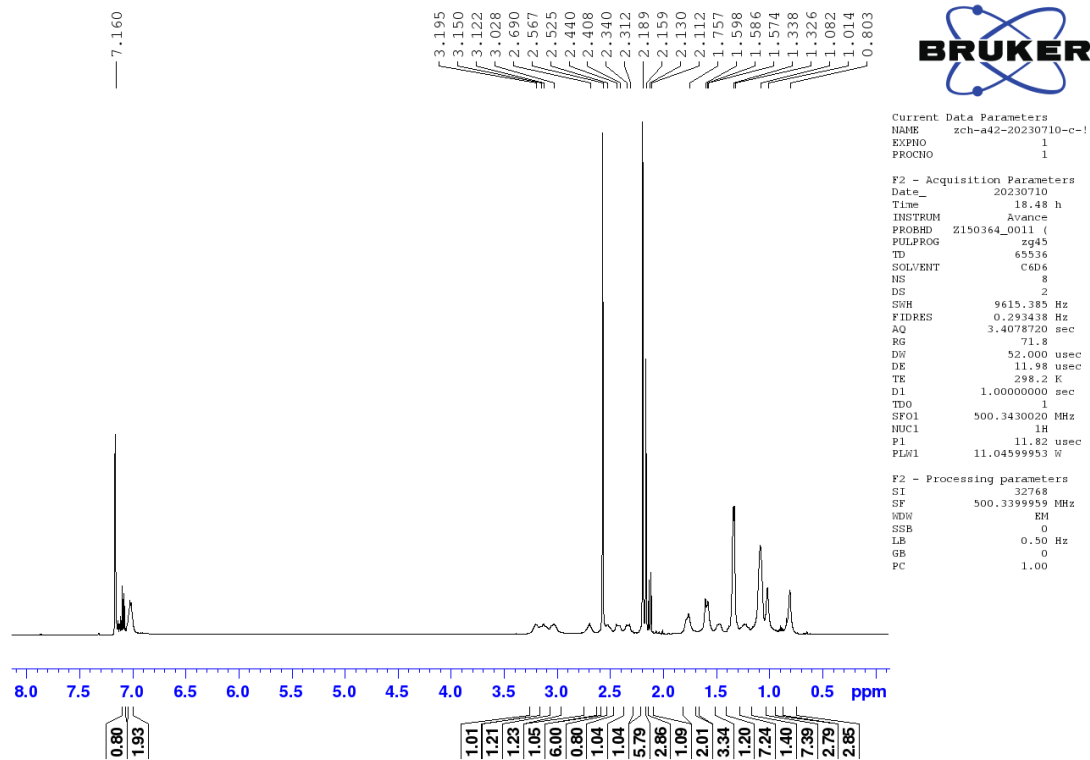

Figure S40.  $^1\text{H}$  NMR spectrum of **9** in  $\text{C}_6\text{D}_6$ .

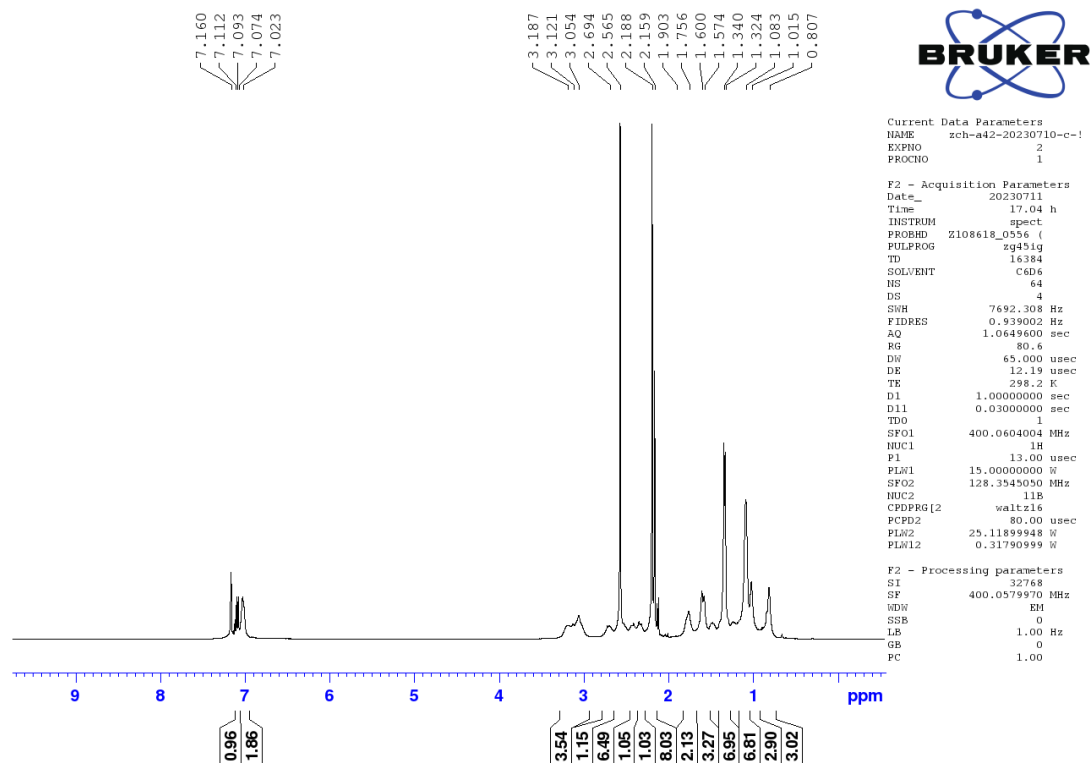

Figure S41.  $^1\text{H}^9$  NMR spectrum of **9** in  $\text{C}_6\text{D}_6$ .

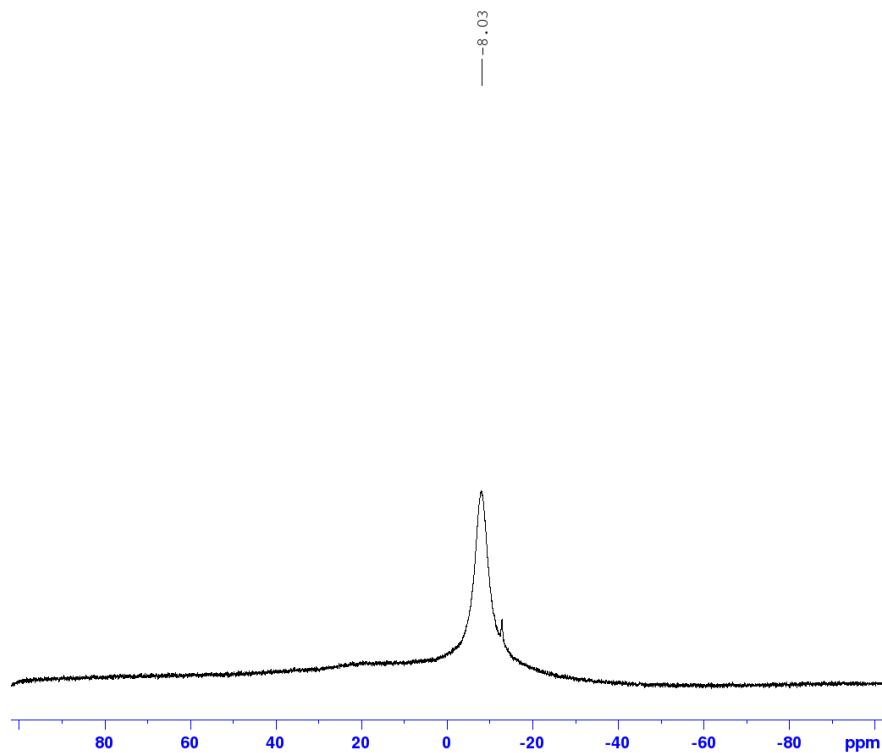

Figure S42.  $^{11}\text{B}$  NMR spectrum of **9** in  $\text{C}_6\text{D}_6$ .

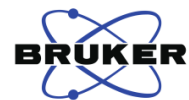

```

Current Data Parameters
NAME      zch-a42-20230710-c-1
EXPNO    3
PROCNO   1

F2 - Acquisition Parameters
Date_    20230710
Time     18.53 h
INSTRUM  Avance
PROBHD   Z150364_0011 (
PULPROG  zgbs
TD       16338
SOLVENT  C6D6
NS       512
DS       4
SWH      32679.738 Hz
FIDRES   4.000458 Hz
AQ       0.2499714 sec
RG       101
DW       15.300 usec
DE       6.50 usec
TE       298.2 K
D1       0.1000000 sec
TD0      1
SF01     160.5289560 MHz
NUC1     11B
P1       15.90 usec
P2       31.80 usec
PLW1     50.0000000 W

F2 - Processing parameters
SI       16384
SF       160.5289555 MHz
WDW      EM
SSB      0
LB       4.00 Hz
GB       0
PC       1.40
  
```

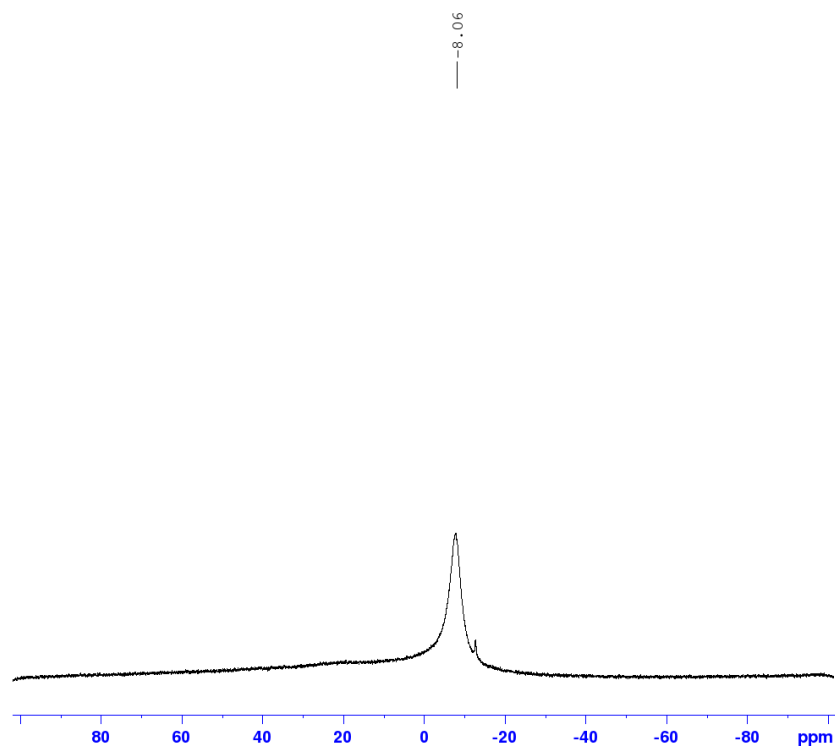

Figure S43.  $^{11}\text{B}\{^1\text{H}\}$  NMR spectrum of **9** in  $\text{C}_6\text{D}_6$ .

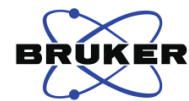

```

Current Data Parameters
NAME      zch-a42-20230710-c-1
EXPNO    4
PROCNO   1

F2 - Acquisition Parameters
Date_    20230710
Time     18.57 h
INSTRUM  Avance
PROBHD   Z150364_0011 (
PULPROG  zgbsig
TD       16338
SOLVENT  C6D6
NS       512
DS       4
SWH      32679.738 Hz
FIDRES   4.000458 Hz
AQ       0.2499714 sec
RG       101
DW       15.300 usec
DE       6.50 usec
TE       298.0 K
D1       0.1000000 sec
D2       0 sec
TD0      1
SF01     160.5289560 MHz
NUC1     11B
P1       15.90 usec
P2       31.80 usec
PLW1     50.0000000 W
SF02     500.3425000 MHz
NUC2     1H
CPDPRG2  waltz64
PCPD2    80.00 usec
PLW2     11.04599953 W
PLW12    0.23504999 W

F2 - Processing parameters
SI       16384
SF       160.5289555 MHz
WDW      EM
SSB      0
LB       4.00 Hz
GB       0
PC       1.40
  
```

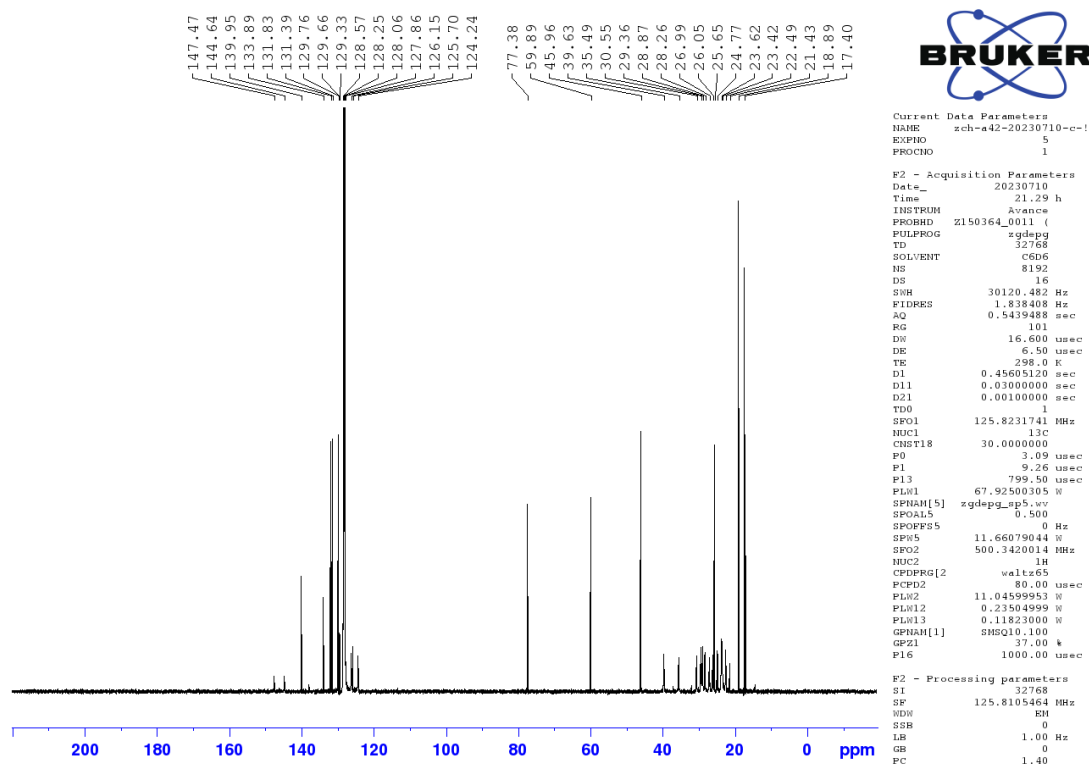

Figure S44.  $^{13}\text{C}\{^1\text{H}\}$  NMR spectrum of **9** in  $\text{C}_6\text{D}_6$ .

**Synthesis of  $10^{\text{Cl}}$  (mixed with  $2^{\text{Cl}}$ ):** in a vial, compound  $1^{\text{Cl}}$  (15.4 mg, 0.05 mmol, 1.0 equiv) and 2-butyne (27 mg, 0.50 mmol, 10.0 equiv) was dissolved in toluene (2 mL). The solution was stirred at 25 °C for 2 days. All volatiles in the solution were removed under vacuum to obtain a mixture of  $10^{\text{Cl}}$  and  $2^{\text{Cl}}$  as an orange oil (1: 0.8, respectively).

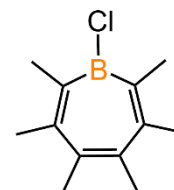

$^1\text{H}$  NMR (500 MHz,  $\text{C}_6\text{D}_6$ ): 1.77 (s, 6H,  $\text{CH}_3$ ), 1.82 (s, 6H,  $\text{CH}_3$ ), 2.26 (s, 6H,  $\text{CH}_3$ );  $^{11}\text{B}$  NMR (161 MHz,  $\text{C}_6\text{D}_6$ ): 54.73 (br. s);  $^{13}\text{C}\{^1\text{H}\}$  NMR (126 MHz,  $\text{C}_6\text{D}_6$ ): 19.56 (s,  $\text{CH}_3$ ), 20.38 (s,  $\text{CH}_3$ ), 21.51 (s,  $\text{CH}_3$ ), 135.90 (s,  $\text{C}-\text{CH}_3$ ), 152.39 (s,  $\text{C}-\text{CH}_3$ ).

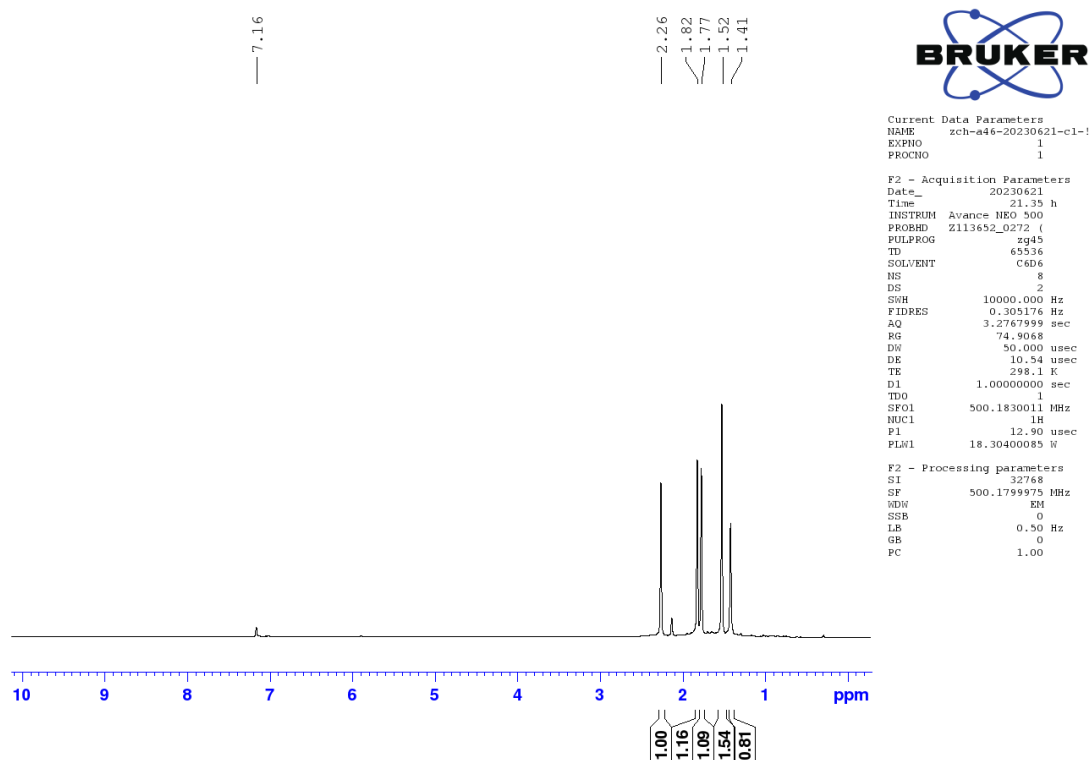

Figure S45.  $^1\text{H}$  NMR spectrum of  $10^{\text{Cl}}$  mixed with  $2^{\text{Cl}}$  in  $\text{C}_6\text{D}_6$ .

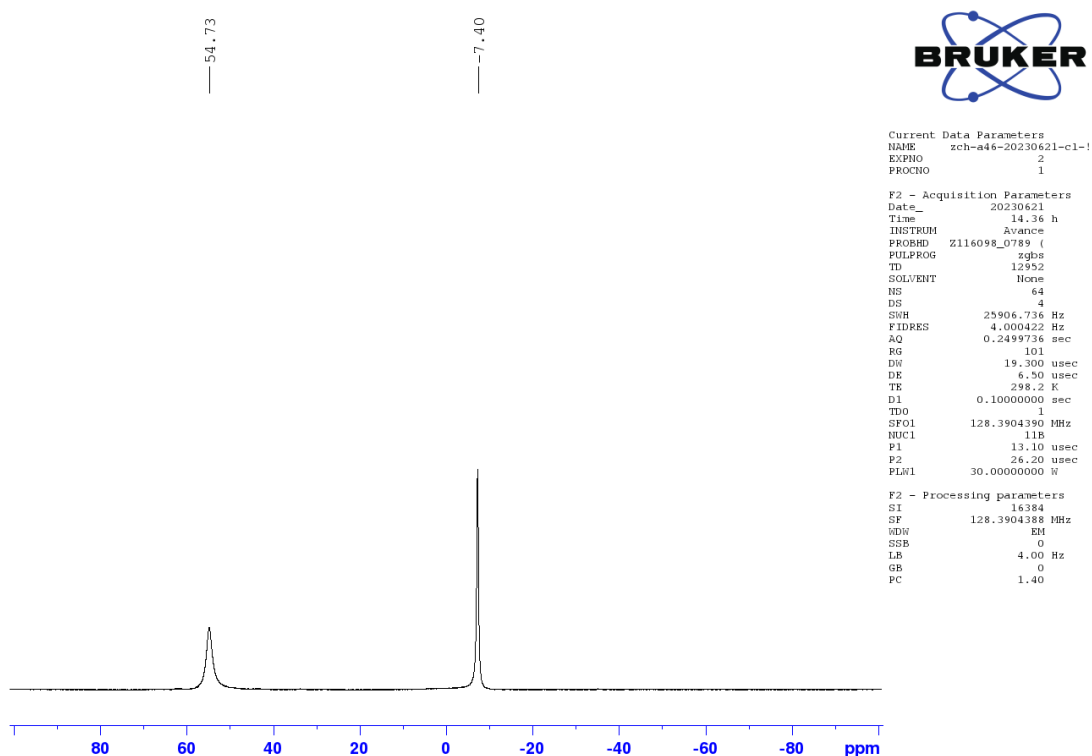

Figure S46.  $^{11}\text{B}$  NMR spectrum of  $10^{\text{Cl}}$  mixed with  $2^{\text{Cl}}$  in  $\text{C}_6\text{D}_6$ .

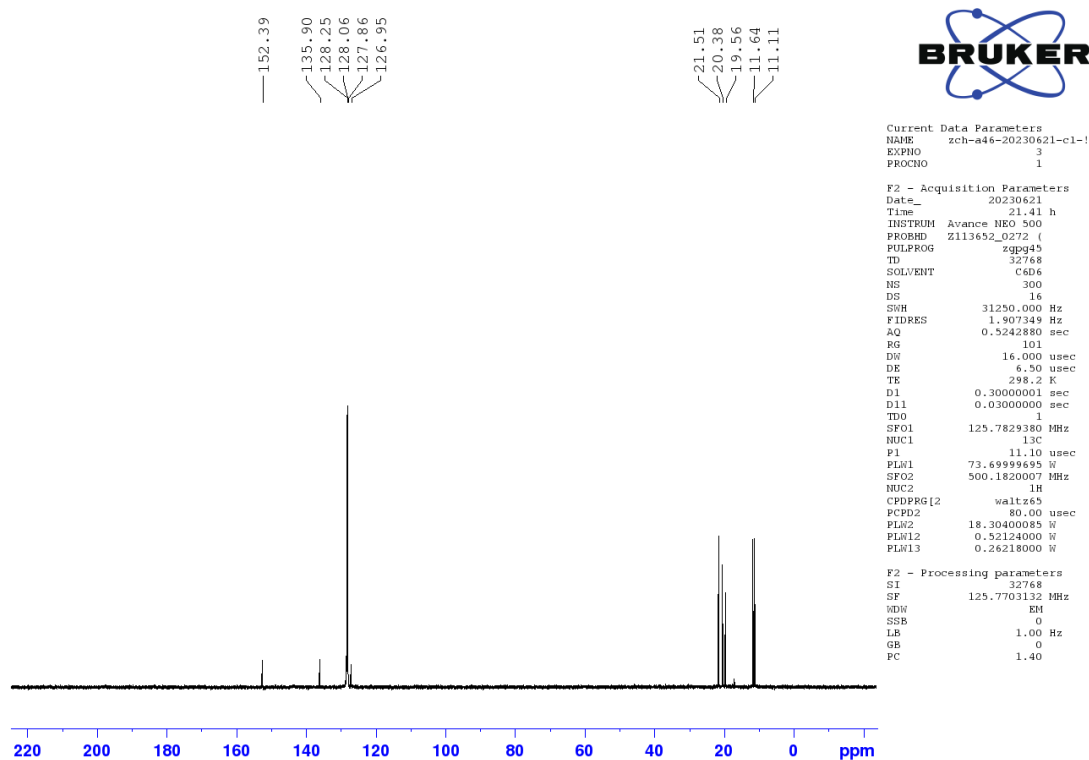

Figure S47.  $^{13}\text{C}\{^1\text{H}\}$  NMR spectrum of  $10^{\text{Cl}}$  mixed with  $2^{\text{Cl}}$  in  $\text{C}_6\text{D}_6$ .

**Synthesis of  $10^{\text{Br}}$  (mixed with  $2^{\text{Br}}$ ):** in a vial, compound  $1^{\text{Br}}$  (19.9 mg, 0.05 mmol, 1.0 equiv) and 2-butyne (27 mg, 0.50 mmol, 10.0 equiv) was dissolved in toluene (2 mL). The solution was stirred at 25 °C for 2 days. All volatiles in the solution were removed by vacuum to obtain a mixture of  $10^{\text{Br}}$  and  $2^{\text{Br}}$  as an orange oil (1 : 1, respectively).

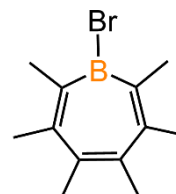

$^1\text{H}$  NMR (500 MHz,  $\text{C}_6\text{D}_6$ ): 1.74 (s, 6H,  $\text{CH}_3$ ), 1.79 (s, 6H,  $\text{CH}_3$ ), 2.33 (s, 6H,  $\text{CH}_3$ );  $^{11}\text{B}$  NMR (161 MHz,  $\text{C}_6\text{D}_6$ ): 57.94 (br. s);  $^{13}\text{C}\{^1\text{H}\}$  NMR (126 MHz,  $\text{C}_6\text{D}_6$ ): 20.34 (s,  $\underline{\text{C}}\text{H}_3$ ), 20.96 (s,  $\underline{\text{C}}\text{H}_3$ ), 21.56 (s,  $\underline{\text{C}}\text{H}_3$ ), 136.14 (s,  $\underline{\text{C}}-\text{CH}_3$ ), 151.48 (s,  $\underline{\text{C}}-\text{CH}_3$ ).

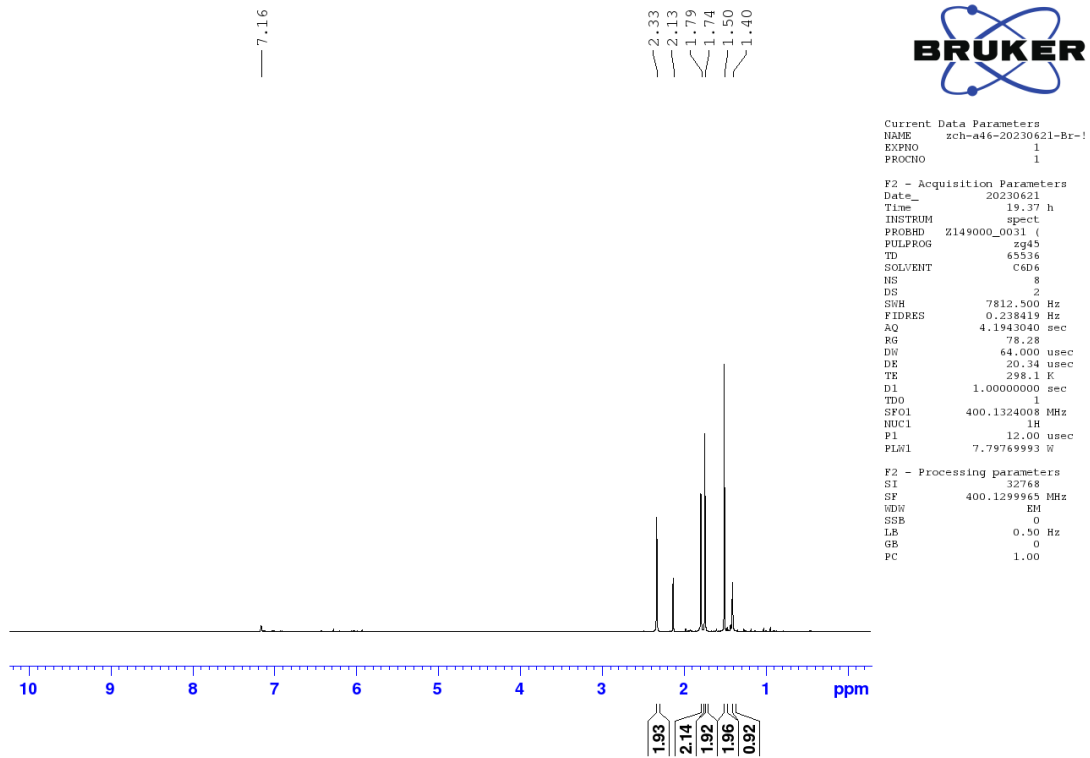

Figure S48.  $^1\text{H}$  NMR spectrum of  $10^{\text{Br}}$  mixed with  $2^{\text{Br}}$  in  $\text{C}_6\text{D}_6$ .

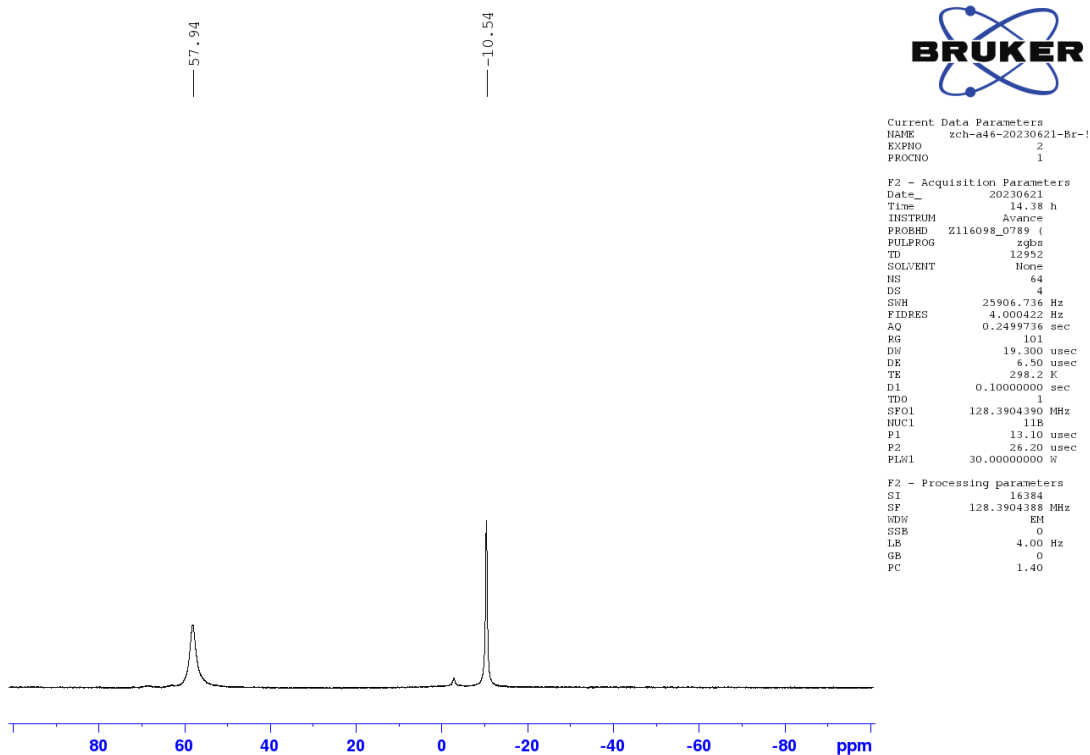

Figure S49.  $^{11}\text{B}$  NMR spectrum of  $10^{\text{Br}}$  mixed with  $2^{\text{Br}}$  in  $\text{C}_6\text{D}_6$ .

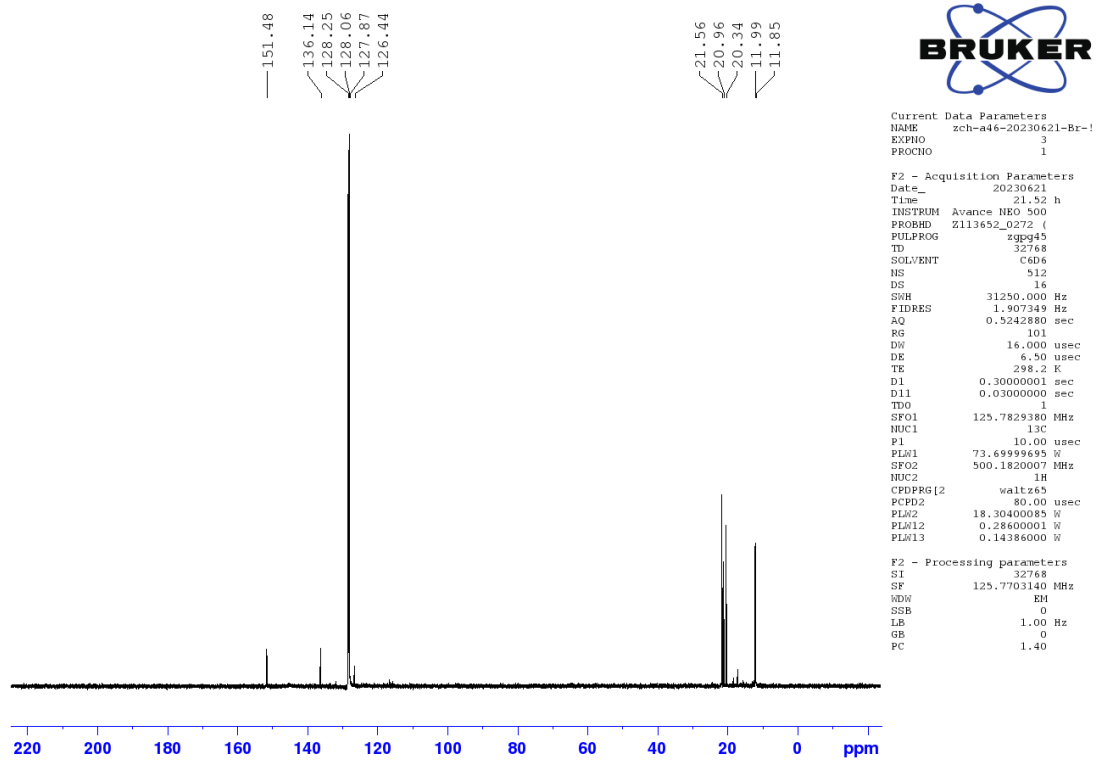

Figure S50.  $^{13}\text{C}\{^1\text{H}\}$  NMR spectrum of  $10^{\text{Br}}$  mixed with  $2^{\text{Br}}$  in  $\text{C}_6\text{D}_6$ .

## Crystal structure

Low-temperature (100 K) diffraction data were collected on a Bruker-AXS X8 Kappa Duo diffractometer with I $\mu$ S micro-sources, coupled to a Photon 3 CPAD detector for all structures. Mo  $K_{\alpha}$  radiation ( $\lambda = 0.71073 \text{ \AA}$ ) was used for all the structures. Data reduction, scaling and absorption corrections were performed using SAINT (Bruker, V8.38A, 2013). The structure was solved with the XT structure solution program using the Intrinsic Phasing solution method<sup>10</sup> and by using Olex2<sup>11</sup> as the graphical interface. The model was refined with the ShelXL program<sup>12</sup> using Least Squares minimization. All non-hydrogen atoms were refined anisotropically. Hydrogen atoms were included in structure factor calculations. All hydrogen atoms were assigned to idealized geometric positions.

Crystallographic data have been deposited with the Cambridge Crystallographic Data as supplementary publication nos. CCDC-2297451 (**1<sup>Cl</sup>**), 2297452 (**2<sup>Ph</sup>**), 2297453 (**3**), 2297454 (**4**), 2297455 (**5<sup>Cl</sup>**), 2297456 (**5<sup>Br</sup>**), 2297457 (**6**), 2297458 (**7**), 2297459 (**8**), 2297460 (**9**). These data can be obtained free of charge from The Cambridge Crystallographic Data Centre via Data <https://www.ccdc.cam.ac.uk>.

**Table S1** Crystal data and structure refinement for **1<sup>Cl</sup>**.

|                                                  |                                                                        |
|--------------------------------------------------|------------------------------------------------------------------------|
| Identification code                              | 2297451                                                                |
| Empirical formula                                | C <sub>16</sub> H <sub>24</sub> B <sub>2</sub> Cl <sub>2</sub>         |
| Formula weight                                   | 308.87                                                                 |
| Temperature/K                                    | 100.00                                                                 |
| Crystal system                                   | monoclinic                                                             |
| Space group                                      | P21                                                                    |
| a/ $\text{\AA}$                                  | 8.5963(5)                                                              |
| b/ $\text{\AA}$                                  | 14.7551(8)                                                             |
| c/ $\text{\AA}$                                  | 13.3230(7)                                                             |
| $\alpha$ / $^{\circ}$                            | 90                                                                     |
| $\beta$ / $^{\circ}$                             | 94.308(2)                                                              |
| $\gamma$ / $^{\circ}$                            | 90                                                                     |
| Volume/ $\text{\AA}^3$                           | 1685.11(16)                                                            |
| Z                                                | 4                                                                      |
| $\rho$ calcg/cm <sup>3</sup>                     | 1.217                                                                  |
| $\mu$ /mm <sup>-1</sup>                          | 0.372                                                                  |
| F(000)                                           | 656.0                                                                  |
| Crystal size/mm <sup>3</sup>                     | 0.087 $\times$ 0.067 $\times$ 0.012                                    |
| Radiation                                        | MoK $\alpha$ ( $\lambda = 0.71073$ )                                   |
| 2 $\Theta$ range for data collection/ $^{\circ}$ | 3.066 to 55.136                                                        |
| Index ranges                                     | -12 $\leq$ h $\leq$ 12, -21 $\leq$ k $\leq$ 21, -19 $\leq$ l $\leq$ 19 |
| Reflections collected                            | 4036                                                                   |
| Independent reflections                          | 4036 [Rint = 0.0408, Rsigma = 0.0304]                                  |



|                                             |                           |
|---------------------------------------------|---------------------------|
| Data/restraints/parameters                  | 4036/1/377                |
| Goodness-of-fit on F2                       | 1.082                     |
| Final R indexes [ $I \geq 2\sigma(I)$ ]     | R1 = 0.0545, wR2 = 0.1415 |
| Final R indexes [all data]                  | R1 = 0.0675, wR2 = 0.1558 |
| Largest diff. peak/hole / e Å <sup>-3</sup> | 0.83/-0.59                |

**Table S2** Crystal data and structure refinement for **2<sup>Ph</sup>**.

|                                                |                                          |
|------------------------------------------------|------------------------------------------|
| Identification code                            | 2297452                                  |
| Empirical formula                              | C18H23B                                  |
| Formula weight                                 | 250.17                                   |
| Temperature/K                                  | 100.00                                   |
| Crystal system                                 | monoclinic                               |
| Space group                                    | P21/c                                    |
| a/Å                                            | 8.7528(3)                                |
| b/Å                                            | 10.9747(3)                               |
| c/Å                                            | 15.4186(6)                               |
| $\alpha/^\circ$                                | 90                                       |
| $\beta/^\circ$                                 | 91.674(2)                                |
| $\gamma/^\circ$                                | 90                                       |
| Volume/Å <sup>3</sup>                          | 1480.47(9)                               |
| Z                                              | 4                                        |
| $\rho_{\text{calc}}/\text{cm}^3$               | 1.122                                    |
| $\mu/\text{mm}^{-1}$                           | 0.062                                    |
| F(000)                                         | 544.0                                    |
| Crystal size/mm <sup>3</sup>                   | 0.067 × 0.045 × 0.023                    |
| Radiation                                      | MoK $\alpha$ ( $\lambda = 0.71073$ )     |
| 2 $\theta$ range for data collection/ $^\circ$ | 4.556 to 55.2                            |
| Index ranges                                   | -11 ≤ h ≤ 11, -14 ≤ k ≤ 14, -20 ≤ l ≤ 20 |
| Reflections collected                          | 36806                                    |
| Independent reflections                        | 3433 [Rint = 0.1677, Rsigma = 0.0539]    |
| Data/restraints/parameters                     | 3433/0/178                               |
| Goodness-of-fit on F2                          | 1.066                                    |
| Final R indexes [ $I \geq 2\sigma(I)$ ]        | R1 = 0.0611, wR2 = 0.1507                |
| Final R indexes [all data]                     | R1 = 0.0663, wR2 = 0.1565                |
| Largest diff. peak/hole / e Å <sup>-3</sup>    | 0.48/-0.31                               |

**Table S3** Crystal data and structure refinement for **3**.

|                     |            |
|---------------------|------------|
| Identification code | 2297453    |
| Empirical formula   | C22H36BCIN |
| Formula weight      | 360.78     |

|                                             |                                          |
|---------------------------------------------|------------------------------------------|
| Temperature/K                               | 100.00                                   |
| Crystal system                              | monoclinic                               |
| Space group                                 | P21                                      |
| a/Å                                         | 9.2417(5)                                |
| b/Å                                         | 10.0889(6)                               |
| c/Å                                         | 11.8541(8)                               |
| $\alpha$ /°                                 | 90                                       |
| $\beta$ /°                                  | 110.192(3)                               |
| $\gamma$ /°                                 | 90                                       |
| Volume/Å <sup>3</sup>                       | 1037.33(11)                              |
| Z                                           | 2                                        |
| $\rho$ calcg/cm <sup>3</sup>                | 1.155                                    |
| $\mu$ /mm <sup>-1</sup>                     | 0.189                                    |
| F(000)                                      | 394.0                                    |
| Crystal size/mm <sup>3</sup>                | 0.065 × 0.056 × 0.012                    |
| Radiation                                   | MoK $\alpha$ ( $\lambda$ = 0.71073)      |
| 2 $\Theta$ range for data collection/°      | 3.66 to 62.282                           |
| Index ranges                                | -12 ≤ h ≤ 13, -14 ≤ k ≤ 14, -17 ≤ l ≤ 17 |
| Reflections collected                       | 59900                                    |
| Independent reflections                     | 6660 [Rint = 0.0395, Rsigma = 0.0278]    |
| Data/restraints/parameters                  | 6660/1/233                               |
| Goodness-of-fit on F <sup>2</sup>           | 1.053                                    |
| Final R indexes [ $I \geq 2\sigma(I)$ ]     | R1 = 0.0482, wR2 = 0.1274                |
| Final R indexes [all data]                  | R1 = 0.0533, wR2 = 0.1303                |
| Largest diff. peak/hole / e Å <sup>-3</sup> | 1.50/-0.52                               |

**Table S4** Crystal data and structure refinement for **4**.

|                       |                                                   |
|-----------------------|---------------------------------------------------|
| Identification code   | 2297454                                           |
| Empirical formula     | C <sub>44</sub> H <sub>70</sub> BCIN <sub>2</sub> |
| Formula weight        | 673.28                                            |
| Temperature/K         | 100.00                                            |
| Crystal system        | monoclinic                                        |
| Space group           | P21/c                                             |
| a/Å                   | 11.6102(4)                                        |
| b/Å                   | 20.6129(8)                                        |
| c/Å                   | 16.4977(5)                                        |
| $\alpha$ /°           | 90                                                |
| $\beta$ /°            | 95.3990(10)                                       |
| $\gamma$ /°           | 90                                                |
| Volume/Å <sup>3</sup> | 3930.7(2)                                         |

|                                                |                                          |
|------------------------------------------------|------------------------------------------|
| Z                                              | 4                                        |
| $\rho_{\text{calc}}/\text{cm}^3$               | 1.138                                    |
| $\mu/\text{mm}^{-1}$                           | 0.130                                    |
| F(000)                                         | 1480.0                                   |
| Crystal size/mm <sup>3</sup>                   | 0.054 × 0.036 × 0.028                    |
| Radiation                                      | MoK $\alpha$ ( $\lambda = 0.71073$ )     |
| 2 $\theta$ range for data collection/ $^\circ$ | 3.17 to 62.22                            |
| Index ranges                                   | -16 ≤ h ≤ 16, -29 ≤ k ≤ 29, -23 ≤ l ≤ 20 |
| Reflections collected                          | 333778                                   |
| Independent reflections                        | 12596 [Rint = 0.1014, Rsigma = 0.0292]   |
| Data/restraints/parameters                     | 12596/0/448                              |
| Goodness-of-fit on F <sup>2</sup>              | 1.070                                    |
| Final R indexes [ $I \geq 2\sigma(I)$ ]        | R1 = 0.0371, wR2 = 0.1012                |
| Final R indexes [all data]                     | R1 = 0.0478, wR2 = 0.1047                |
| Largest diff. peak/hole / e $\text{\AA}^{-3}$  | 0.46/-0.27                               |

**Table S5** Crystal data and structure refinement for **5<sup>Cl</sup>**.

|                                                |                                          |
|------------------------------------------------|------------------------------------------|
| Identification code                            | 2297455                                  |
| Empirical formula                              | C <sub>23</sub> H <sub>35</sub> BCIN     |
| Formula weight                                 | 371.78                                   |
| Temperature/K                                  | 100.00                                   |
| Crystal system                                 | orthorhombic                             |
| Space group                                    | Pbca                                     |
| a/ $\text{\AA}$                                | 13.334                                   |
| b/ $\text{\AA}$                                | 12.104                                   |
| c/ $\text{\AA}$                                | 25.993                                   |
| $\alpha/^\circ$                                | 90                                       |
| $\beta/^\circ$                                 | 90.02                                    |
| $\gamma/^\circ$                                | 90                                       |
| Volume/ $\text{\AA}^3$                         | 4195.0                                   |
| Z                                              | 8                                        |
| $\rho_{\text{calc}}/\text{cm}^3$               | 1.177                                    |
| $\mu/\text{mm}^{-1}$                           | 0.189                                    |
| F(000)                                         | 1616.0                                   |
| Crystal size/mm <sup>3</sup>                   | 0.119 × 0.111 × 0.039                    |
| Radiation                                      | MoK $\alpha$ ( $\lambda = 0.71073$ )     |
| 2 $\theta$ range for data collection/ $^\circ$ | 3.134 to 68.742                          |
| Index ranges                                   | -17 ≤ h ≤ 17, -19 ≤ k ≤ 19, -37 ≤ l ≤ 37 |
| Reflections collected                          | 276364                                   |
| Independent reflections                        | 6699 [Rint = 0.0396, Rsigma = 0.0100]    |

|                                             |                           |
|---------------------------------------------|---------------------------|
| Data/restraints/parameters                  | 6699/0/240                |
| Goodness-of-fit on F2                       | 1.092                     |
| Final R indexes [ $I \geq 2\sigma(I)$ ]     | R1 = 0.0438, wR2 = 0.1292 |
| Final R indexes [all data]                  | R1 = 0.0470, wR2 = 0.1316 |
| Largest diff. peak/hole / e Å <sup>-3</sup> | 0.73/-0.43                |

**Table S6** Crystal data and structure refinement for **5<sup>Br</sup>**.

|                                                |                                          |
|------------------------------------------------|------------------------------------------|
| Identification code                            | 2297456                                  |
| Empirical formula                              | C <sub>23</sub> H <sub>35</sub> BBrN     |
| Formula weight                                 | 416.24                                   |
| Temperature/K                                  | 100.00                                   |
| Crystal system                                 | orthorhombic                             |
| Space group                                    | Pbca                                     |
| a/Å                                            | 12.1571(5)                               |
| b/Å                                            | 13.5618(7)                               |
| c/Å                                            | 25.8390(13)                              |
| $\alpha/^\circ$                                | 90                                       |
| $\beta/^\circ$                                 | 90                                       |
| $\gamma/^\circ$                                | 90                                       |
| Volume/Å <sup>3</sup>                          | 4260.1(4)                                |
| Z                                              | 8                                        |
| $\rho_{\text{calc}}/\text{cm}^3$               | 1.298                                    |
| $\mu/\text{mm}^{-1}$                           | 1.937                                    |
| F(000)                                         | 1760.0                                   |
| Crystal size/mm <sup>3</sup>                   | 0.042 × 0.033 × 0.023                    |
| Radiation                                      | MoK $\alpha$ ( $\lambda = 0.71073$ )     |
| 2 $\theta$ range for data collection/ $^\circ$ | 3.152 to 49.996                          |
| Index ranges                                   | -14 ≤ h ≤ 14, -16 ≤ k ≤ 16, -30 ≤ l ≤ 30 |
| Reflections collected                          | 217441                                   |
| Independent reflections                        | 3751 [Rint = 0.0404, Rsigma = 0.0084]    |
| Data/restraints/parameters                     | 3751/1/244                               |
| Goodness-of-fit on F2                          | 1.093                                    |
| Final R indexes [ $I \geq 2\sigma(I)$ ]        | R1 = 0.0421, wR2 = 0.1000                |
| Final R indexes [all data]                     | R1 = 0.0435, wR2 = 0.1006                |
| Largest diff. peak/hole / e Å <sup>-3</sup>    | 1.87/-0.75                               |

**Table S7** Crystal data and structure refinement for **6**.

|                     |                                                                 |
|---------------------|-----------------------------------------------------------------|
| Identification code | 2297457                                                         |
| Empirical formula   | C <sub>36</sub> H <sub>48</sub> BCl <sub>7</sub> N <sub>2</sub> |
| Formula weight      | 767.72                                                          |

|                                             |                                          |
|---------------------------------------------|------------------------------------------|
| Temperature/K                               | 100.00                                   |
| Crystal system                              | triclinic                                |
| Space group                                 | P-1                                      |
| a/Å                                         | 11.7206(8)                               |
| b/Å                                         | 12.0045(8)                               |
| c/Å                                         | 15.0853(10)                              |
| $\alpha$ /°                                 | 108.946(3)                               |
| $\beta$ /°                                  | 93.723(2)                                |
| $\gamma$ /°                                 | 95.092(3)                                |
| Volume/Å <sup>3</sup>                       | 1989.7(2)                                |
| Z                                           | 2                                        |
| $\rho$ calcd/cm <sup>3</sup>                | 1.281                                    |
| $\mu$ /mm <sup>-1</sup>                     | 0.526                                    |
| F(000)                                      | 804.0                                    |
| Crystal size/mm <sup>3</sup>                | 0.122 × 0.083 × 0.023                    |
| Radiation                                   | MoK $\alpha$ ( $\lambda$ = 0.71073)      |
| 2 $\Theta$ range for data collection/°      | 2.868 to 62.14                           |
| Index ranges                                | -17 ≤ h ≤ 16, -17 ≤ k ≤ 17, -21 ≤ l ≤ 21 |
| Reflections collected                       | 28466                                    |
| Independent reflections                     | 12481 [Rint = 0.0225, Rsigma = 0.0293]   |
| Data/restraints/parameters                  | 12481/0/427                              |
| Goodness-of-fit on F <sup>2</sup>           | 1.032                                    |
| Final R indexes [ $I \geq 2\sigma(I)$ ]     | R1 = 0.0400, wR2 = 0.0982                |
| Final R indexes [all data]                  | R1 = 0.0462, wR2 = 0.1031                |
| Largest diff. peak/hole / e Å <sup>-3</sup> | 1.70/-1.45                               |

**Table S8** Crystal data and structure refinement for **7**.

|                       |                                      |
|-----------------------|--------------------------------------|
| Identification code   | 2297458                              |
| Empirical formula     | C <sub>35</sub> H <sub>53</sub> BBrN |
| Formula weight        | 578.50                               |
| Temperature/K         | 100.00                               |
| Crystal system        | monoclinic                           |
| Space group           | P21/c                                |
| a/Å                   | 10.810(11)                           |
| b/Å                   | 12.282(8)                            |
| c/Å                   | 23.47(3)                             |
| $\alpha$ /°           | 90                                   |
| $\beta$ /°            | 93.75(5)                             |
| $\gamma$ /°           | 90                                   |
| Volume/Å <sup>3</sup> | 3110(5)                              |

|                                                |                                          |
|------------------------------------------------|------------------------------------------|
| Z                                              | 4                                        |
| $\rho_{\text{calc}}/\text{cm}^3$               | 1.236                                    |
| $\mu/\text{mm}^{-1}$                           | 1.346                                    |
| F(000)                                         | 1240.0                                   |
| Crystal size/ $\text{mm}^3$                    | 0.091 × 0.054 × 0.023                    |
| Radiation                                      | MoK $\alpha$ ( $\lambda = 0.71073$ )     |
| 2 $\Theta$ range for data collection/ $^\circ$ | 3.478 to 62.138                          |
| Index ranges                                   | -15 ≤ h ≤ 15, -17 ≤ k ≤ 17, -34 ≤ l ≤ 33 |
| Reflections collected                          | 207305                                   |
| Independent reflections                        | 9960 [Rint = 0.0401, Rsigma = 0.0154]    |
| Data/restraints/parameters                     | 9960/0/355                               |
| Goodness-of-fit on F <sup>2</sup>              | 1.100                                    |
| Final R indexes [ $I \geq 2\sigma(I)$ ]        | R1 = 0.0289, wR2 = 0.0800                |
| Final R indexes [all data]                     | R1 = 0.0345, wR2 = 0.0822                |
| Largest diff. peak/hole / e $\text{\AA}^{-3}$  | 0.95/-0.29                               |

**Table S9** Crystal data and structure refinement for **8**.

|                                                |                                          |
|------------------------------------------------|------------------------------------------|
| Identification code                            | 2297459                                  |
| Empirical formula                              | C <sub>23</sub> H <sub>35</sub> BBrN     |
| Formula weight                                 | 416.24                                   |
| Temperature/K                                  | 100.00                                   |
| Crystal system                                 | triclinic                                |
| Space group                                    | P-1                                      |
| a/ $\text{\AA}$                                | 8.7428(7)                                |
| b/ $\text{\AA}$                                | 9.4037(8)                                |
| c/ $\text{\AA}$                                | 13.3258(11)                              |
| $\alpha/^\circ$                                | 80.686(3)                                |
| $\beta/^\circ$                                 | 87.975(3)                                |
| $\gamma/^\circ$                                | 80.672(3)                                |
| Volume/ $\text{\AA}^3$                         | 1066.79(15)                              |
| Z                                              | 2                                        |
| $\rho_{\text{calc}}/\text{cm}^3$               | 1.296                                    |
| $\mu/\text{mm}^{-1}$                           | 1.933                                    |
| F(000)                                         | 440.0                                    |
| Crystal size/ $\text{mm}^3$                    | 0.102 × 0.098 × 0.021                    |
| Radiation                                      | MoK $\alpha$ ( $\lambda = 0.71073$ )     |
| 2 $\Theta$ range for data collection/ $^\circ$ | 3.098 to 62.768                          |
| Index ranges                                   | -12 ≤ h ≤ 12, -13 ≤ k ≤ 13, -19 ≤ l ≤ 19 |
| Reflections collected                          | 70071                                    |
| Independent reflections                        | 6941 [Rint = 0.0428, Rsigma = 0.0207]    |

|                                               |                           |
|-----------------------------------------------|---------------------------|
| Data/restraints/parameters                    | 6941/0/241                |
| Goodness-of-fit on F2                         | 1.073                     |
| Final R indexes [ $I \geq 2\sigma(I)$ ]       | R1 = 0.0242, wR2 = 0.0646 |
| Final R indexes [all data]                    | R1 = 0.0283, wR2 = 0.0660 |
| Largest diff. peak/hole / e $\text{\AA}^{-3}$ | 0.68/-0.46                |

**Table S10** Crystal data and structure refinement for **9**.

|                                                |                                                                |
|------------------------------------------------|----------------------------------------------------------------|
| Identification code                            | 2297460                                                        |
| Empirical formula                              | C <sub>36</sub> H <sub>55</sub> BBrCl <sub>2</sub> N           |
| Formula weight                                 | 663.43                                                         |
| Temperature/K                                  | 100.00                                                         |
| Crystal system                                 | monoclinic                                                     |
| Space group                                    | P21/c                                                          |
| a/ $\text{\AA}$                                | 14.0779(6)                                                     |
| b/ $\text{\AA}$                                | 12.7663(6)                                                     |
| c/ $\text{\AA}$                                | 20.0966(10)                                                    |
| $\alpha/^\circ$                                | 90                                                             |
| $\beta/^\circ$                                 | 91.539(2)                                                      |
| $\gamma/^\circ$                                | 90                                                             |
| Volume/ $\text{\AA}^3$                         | 3610.5(3)                                                      |
| Z                                              | 4                                                              |
| $\rho_{\text{calc}}/\text{cm}^3$               | 1.220                                                          |
| $\mu/\text{mm}^{-1}$                           | 1.311                                                          |
| F(000)                                         | 1408.0                                                         |
| Crystal size/mm <sup>3</sup>                   | 0.12 × 0.09 × 0.03                                             |
| Radiation                                      | MoK $\alpha$ ( $\lambda = 0.71073$ )                           |
| 2 $\theta$ range for data collection/ $^\circ$ | 2.894 to 64.25                                                 |
| Index ranges                                   | -19 ≤ h ≤ 21, -19 ≤ k ≤ 19, -30 ≤ l ≤ 30                       |
| Reflections collected                          | 299895                                                         |
| Independent reflections                        | 12617 [R <sub>int</sub> = 0.0347, R <sub>sigma</sub> = 0.0118] |
| Data/restraints/parameters                     | 12617/4/391                                                    |
| Goodness-of-fit on F2                          | 1.064                                                          |
| Final R indexes [ $I \geq 2\sigma(I)$ ]        | R1 = 0.0616, wR2 = 0.2118                                      |
| Final R indexes [all data]                     | R1 = 0.0679, wR2 = 0.2195                                      |
| Largest diff. peak/hole / e $\text{\AA}^{-3}$  | 1.49/-2.43                                                     |

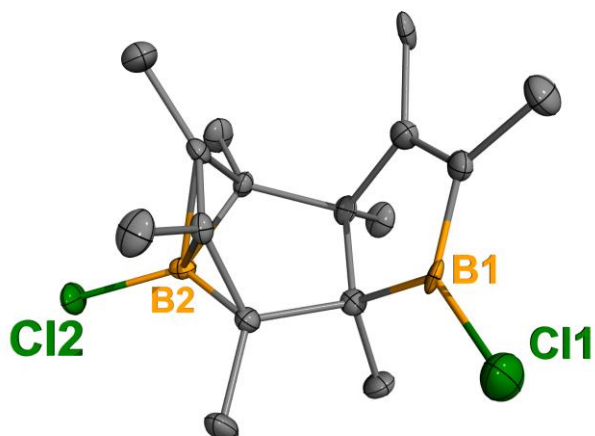

**Figure S51.** Single crystal structure of **1<sup>Cl</sup>**. Hydrogen atoms have been omitted for clarity. Thermal ellipsoids are drawn at the 50 % probability level.

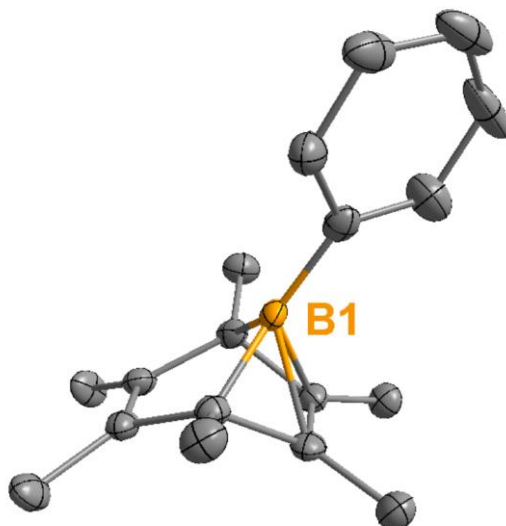

**Figure S52.** Single crystal structure of **2<sup>Ph</sup>**. Hydrogen atoms have been omitted for clarity. Thermal ellipsoids are drawn at the 50 % probability level.



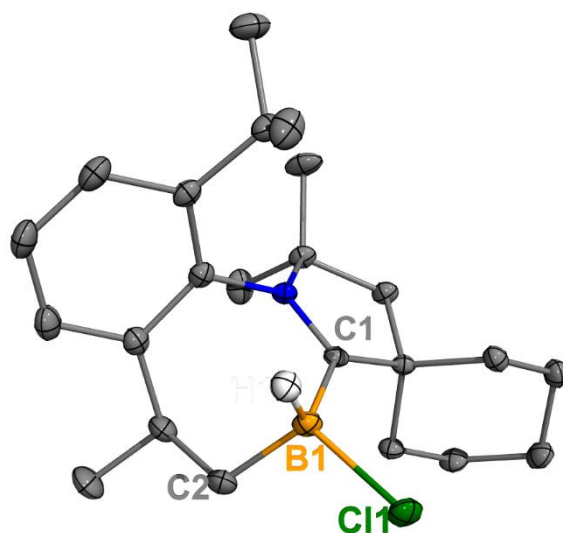

**Figure S53.** Single crystal structure of **5<sup>Cl</sup>**. Hydrogen atoms, except for the one connected to B1, have been omitted for clarity. Thermal ellipsoids are drawn at the 50 % probability level.

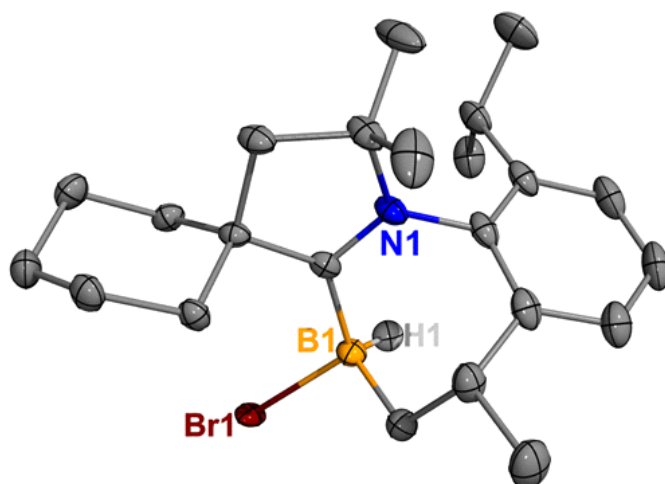

**Figure S54.** Single crystal structure of **5<sup>Br</sup>**. Hydrogen atoms, except for the one connected to B1, have been omitted for clarity. Thermal ellipsoids are drawn at the 50 % probability level.

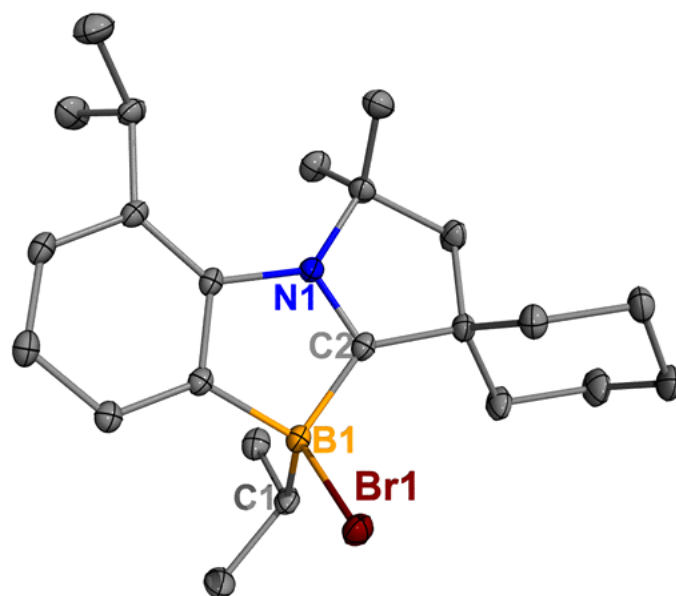

**Figure S55.** Single crystal structure of **8**. Hydrogen atoms have been omitted for clarity. Thermal ellipsoids are drawn at the 50 % probability level.

## Computational Studies

Unless otherwise indicated, all calculations were performed with Gaussian 09 program<sup>13</sup> and ORCA 5.0.3 program<sup>14</sup>. All geometry optimizations and frequency calculation were performed at  $\omega$ B97xD/6-311G\*\* level of theory<sup>15-19</sup> with Gaussian 09. Frequency calculations were performed to confirm a transition state has only one imaginary frequency, while a local minimum has no imaginary frequency. Intrinsic reaction coordinate (IRC) calculations<sup>20, 21</sup> were also carried out to further confirm that transition states can link the relevant local minima. Single point energies were calculated at  $\omega$ B97M-V/def2-QZVPP level of theory<sup>22-24</sup> with ORCA 5.0.3. In all cases, computed electronic energies were corrected for thermal energy to obtain the corresponding free energy (all free energies reported at 298.15 K within this SI). All geometry optimizations, frequency calculations, and electronic energy calculations applied the SMD solvation module.<sup>25</sup> Static electron-correlation effects of I to IV and TS<sub>SM-I</sub> to TS<sub>III-IV</sub> were measured and their FOD plots are displayed in Figure S56.<sup>26</sup> All of the intermediates or transition states suggested either no visible FOD or relatively localized FOD. Cartesian coordinates from all structures are compiled in xyz\_all.xyz file which could be found at <https://pubs.acs.org>.

**Table S11.** Computed energies for singlet and triplet borylenes. Computed single-point energies and total Gibbs free energies (G) (Hartree) at the level of  $\omega$ B97xD/6-311G\*\*, relative electronic energies ( $\Delta E$ ) (kcal/mol), relative Gibbs free energies ( $\Delta G_T$ ) (kcal/mol).

|                 | $E_h$        | $\Delta E$ | $G_T$        | $\Delta G_T$ |
|-----------------|--------------|------------|--------------|--------------|
| IV (singlet)    | -1437.316571 |            | -1436.828204 |              |
| IV (triplet)    | -1437.310514 | 3.81591    | -1436.825355 | 1.79487      |
| IV-Br (singlet) | -3551.28128  |            | -3550.794479 |              |
| IV-Br (triplet) | -3551.275085 | 3.90285    | -3550.788872 | 3.53241      |

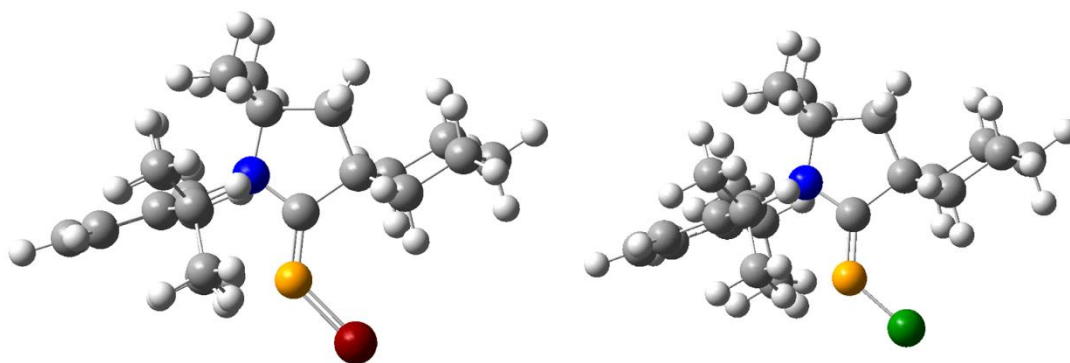

**Figure S56.** Optimized structure of triplet IV<sup>Br</sup> (left) and IV (right).

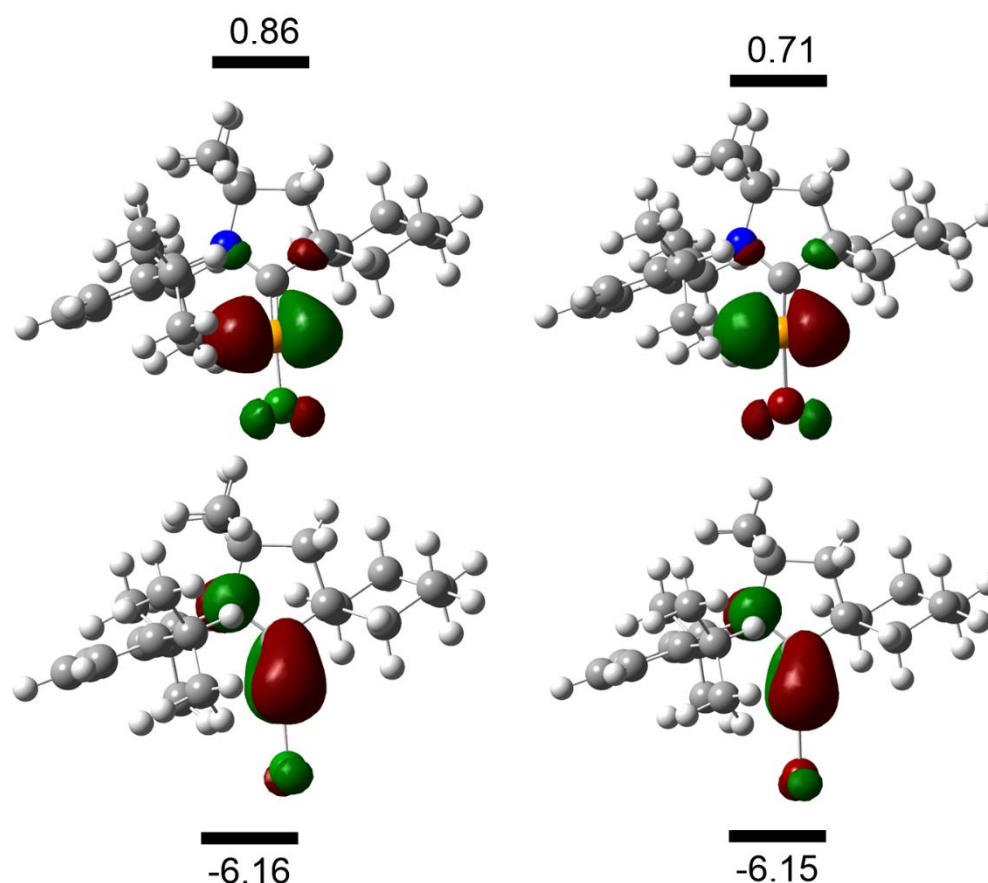

**Figure S57.** HOMO-LUMO gap of singlet **IV** (left) and **IV<sup>Br</sup>** (right). The unit of energies is eV and an isovalue of 0.06 ( $\text{e}/\text{\AA}^3/2$ ) was used in the isosurface contour plots.

**Table S12.** Computed energies for the release of CAAC–chloroborylene in toluene solution. Computed Single-point energies ( $E_{\text{n}1}$ ,  $\omega\text{B97xD}/6\text{-}311\text{G}^{**}$ ;  $E_{\text{n}2}$   $\omega\text{B97M-V}/\text{def2-QZVPP}$ ), Gibbs free-energy corrections ( $G_{\text{c}}$ ,  $\omega\text{B97xD}/6\text{-}311\text{G}^{**}$ ) (Hartree), total Gibbs free energies ( $G_{\text{T}} = E_{\text{n}2} + G_{\text{c}}$ ) (Hartree), relative electronic energies ( $\Delta E$ ) (kcal/mol), relative Gibbs free energies ( $\Delta G_{\text{T}}$ ) (kcal/mol).

|                             | $E_{\text{n}1}$ | $G_{\text{c}}$ | $E_{\text{n}2}$ | $G_{\text{T}}$ | $\Delta G_{\text{T}}$ | $\Delta E$ |
|-----------------------------|-----------------|----------------|-----------------|----------------|-----------------------|------------|
| $2^{\text{O}}$              | -953.191335     | 0.233547       | -953.183658     | -952.950111    |                       |            |
| CAAC                        | -952.227229     | 0.485641       | -952.222040     | -951.736399    | 0.000000              | 0.000000   |
| $\text{TS}_{\text{SM-I}}$   | -1905.420707    | 0.745392       | -1905.402031    | -1904.656639   | 18.818251             | 2.309731   |
| I                           | -1905.449456    | 0.749715       | -1905.430241    | -1904.680526   | 3.769510              | -15.462499 |
| $\text{TS}_{\text{I-II}}$   | -1905.423063    | 0.748385       | -1905.401741    | -1904.653356   | 20.886900             | 2.492790   |
| II                          | -1905.463108    | 0.747583       | -1905.434677    | -1904.687094   | -0.367996             | -18.256846 |
| $\text{TS}_{\text{II-III}}$ | -1905.417885    | 0.750183       | -1905.394023    | -1904.643840   | 26.882125             | 7.355275   |
| III                         | -1905.453023    | 0.753546       | -1905.434459    | -1904.680913   | 3.526167              | -18.119373 |
| $\text{TS}_{\text{III-IV}}$ | -1905.41271     | 0.74725        | -1905.396934    | -1904.649684   | 23.200374             | 5.521314   |
| IV                          | -1437.316571    | 0.48837        | -1437.307478    |                |                       |            |
| $\text{C}_6\text{Me}_6$     | -468.112472     | 0.230473       | -468.105126     | -1904.693763   | -4.569907             | -4.350667  |
| $\text{TS}_{\text{I-IV}}$   | -1905.382373    | 0.747226       | -1905.364224    | -1904.616998   | 43.792420             | 26.128480  |

**Table S13.** Computed energies for the release of CAAC–bromoborylene, C–H activation, and the conversion from **7** to **9** in toluene solution. Computed Single-point energies ( $E_{h1}$ ,  $\omega$ B97xD/6-311G\*\*;  $E_{h2}$   $\omega$ B97M-V/def2-QZVPP), Gibbs free-energy corrections ( $G_c$ ,  $\omega$ B97xD/6-311G\*\*) (Hartree), total Gibbs free energies ( $G_T = E_{h2} + G_c$ ) (Hartree), relative electronic energies ( $\Delta E$ ) (kcal/mol), relative Gibbs free energies ( $\Delta G_T$ ) (kcal/mol).

|                                                   | $E_{h1}$     | $G_c$    | $E_{h2}$     | $G_T$        | $\Delta G_T$ | $\Delta E$ |
|---------------------------------------------------|--------------|----------|--------------|--------------|--------------|------------|
| <b>9</b>                                          | -4019.484272 | 0.745854 | -4019.358549 | -4018.612695 | -40.268901   | -38.165961 |
| TS <sub>IV-9</sub> <sup>Br</sup>                  | -4019.394271 | 0.744142 | -4019.267937 | -4018.523795 | 15.737879    | 18.919379  |
| IV <sup>Br</sup> + C <sub>6</sub> Me <sub>6</sub> | -4019.393752 | 0.717274 | -4019.268151 | -4018.550877 | -1.323756    | 18.784584  |
| TS <sub>III-IV</sub> <sup>Br</sup>                | -4019.371489 | 0.744712 | -4019.248644 | -4018.503932 | 28.252035    | 31.074435  |
| III <sup>Br</sup>                                 | -4019.415646 | 0.749503 | -4019.290004 | -4018.540501 | 5.213521     | 5.017591   |
| TS <sub>7-III</sub> <sup>Br</sup>                 | -4019.384842 | 0.748748 | -4019.255770 | -4018.507022 | 26.305070    | 26.584790  |
| <b>7</b>                                          | -4019.430646 | 0.749192 | -4019.297968 | -4018.548776 | 0.000000     | 0.000000   |
| TS <sub>7-9</sub> <sup>Br</sup>                   | -4019.370316 | 0.747196 | -4019.239857 | -4018.492661 | 35.352771    | 36.610251  |
| <b>9</b>                                          | -4019.484272 | 0.745854 | -4019.358549 | -4018.612695 | -40.268901   | -38.165961 |
| C-H activation                                    |              |          |              |              |              |            |
| IV <sup>Br</sup>                                  | -3551.281280 | 0.486801 | -3551.163025 | -3550.676224 | 0.000000     | 0.000000   |
| TS <sub>IV-5</sub> <sup>Br</sup>                  | -3551.267754 | 0.487579 | -3551.153324 | -3550.665745 | 6.602299     | 6.112159   |
| 5 <sup>Br</sup>                                   | -3551.361558 | 0.491492 | -3551.247131 | -3550.755639 | -50.031078   | -52.986408 |

**Table S14.** Computed energies for the release of CAAC–bromoborylene and the conversion from II<sup>Br</sup> to V<sup>Br</sup> in DCM solution. Computed Single-point energies ( $E_{h1}$ ,  $\omega$ B97xD/6-311G\*\*;  $E_{h2}$   $\omega$ B97M-V/def2-QZVPP), Gibbs free-energy corrections ( $G_c$ ,  $\omega$ B97xD/6-311G\*\*) (Hartree), total Gibbs free energies ( $G_T = E_{h2} + G_c$ ) (Hartree), relative electronic energies ( $\Delta E$ ) (kcal/mol), relative Gibbs free energies ( $\Delta G_T$ ) (kcal/mol).

|                                    | $E_{h1}$     | $G_c$    | $E_{h2}$     | $G_T$        | $\Delta G_T$ | $\Delta E$ |
|------------------------------------|--------------|----------|--------------|--------------|--------------|------------|
| C <sub>6</sub> Me <sub>6</sub>     | -468.114814  | 0.230080 | -468.106702  |              |              |            |
| IV <sup>Br</sup>                   | -3551.284817 | 0.486610 | -3551.165629 | -4018.555641 | 5.405211     | 25.456851  |
| TS <sub>III-IV</sub> <sup>Br</sup> | -4019.377965 | 0.744807 | -4019.253601 | -4018.508794 | 34.918563    | 37.256493  |
| III <sup>Br</sup>                  | -4019.423730 | 0.750017 | -4019.296721 | -4018.546704 | 11.035483    | 10.091113  |
| TS <sub>7-III</sub> <sup>Br</sup>  | -4019.394593 | 0.746647 | -4019.264035 | -4018.517388 | 29.504853    | 30.683583  |
| <b>7</b>                           | -4019.446859 | 0.748518 | -4019.312739 | -4018.564221 | 0.000000     | 0.000000   |
| TS <sub>7-9</sub> <sup>Br</sup>    | -4019.384695 | 0.741824 | -4019.254550 | -4018.512726 | 32.441932    | 36.659152  |
| <b>9</b>                           | -4019.493778 | 0.744713 | -4019.366246 | -4018.621533 | -36.106610   | -33.709460 |

**Table S15.** Computed energies for the conversion from borepin VII<sup>Br</sup> to boranorbornadiene II<sup>Br</sup> in toluene solution. Computed Single-point energies ( $E_{h1}$ ,  $\omega$ B97xD/6-311G\*\*;  $E_{h2}$   $\omega$ B97M-V/def2-QZVPP), Gibbs free-energy corrections ( $G_c$ ,  $\omega$ B97xD/6-311G\*\*) (Hartree), total Gibbs free energies ( $G_T = E_{h2} + G_c$ ) (Hartree), relative electronic energies ( $\Delta E$ ) (kcal/mol), relative Gibbs free energies ( $\Delta G_T$ ) (kcal/mol).

|          | $E_{h1}$     | $G_c$    | $E_{h2}$     | $G_T$        | $\Delta G_T$ | $\Delta E$ |
|----------|--------------|----------|--------------|--------------|--------------|------------|
| <b>7</b> | -4019.415646 | 0.749503 | -4019.290004 | -4018.540501 | 0.000000     | 0.000000   |

|                                   |              |          |              |              |           |           |
|-----------------------------------|--------------|----------|--------------|--------------|-----------|-----------|
| TS <sub>7-VII</sub> <sup>Br</sup> | -4019.398008 | 0.749931 | -4019.272734 | -4018.522803 | 11.149431 | 10.879791 |
| VII <sup>Br</sup>                 | -4019.404125 | 0.746333 | -4019.279926 | -4018.533593 | 4.351706  | 6.348806  |

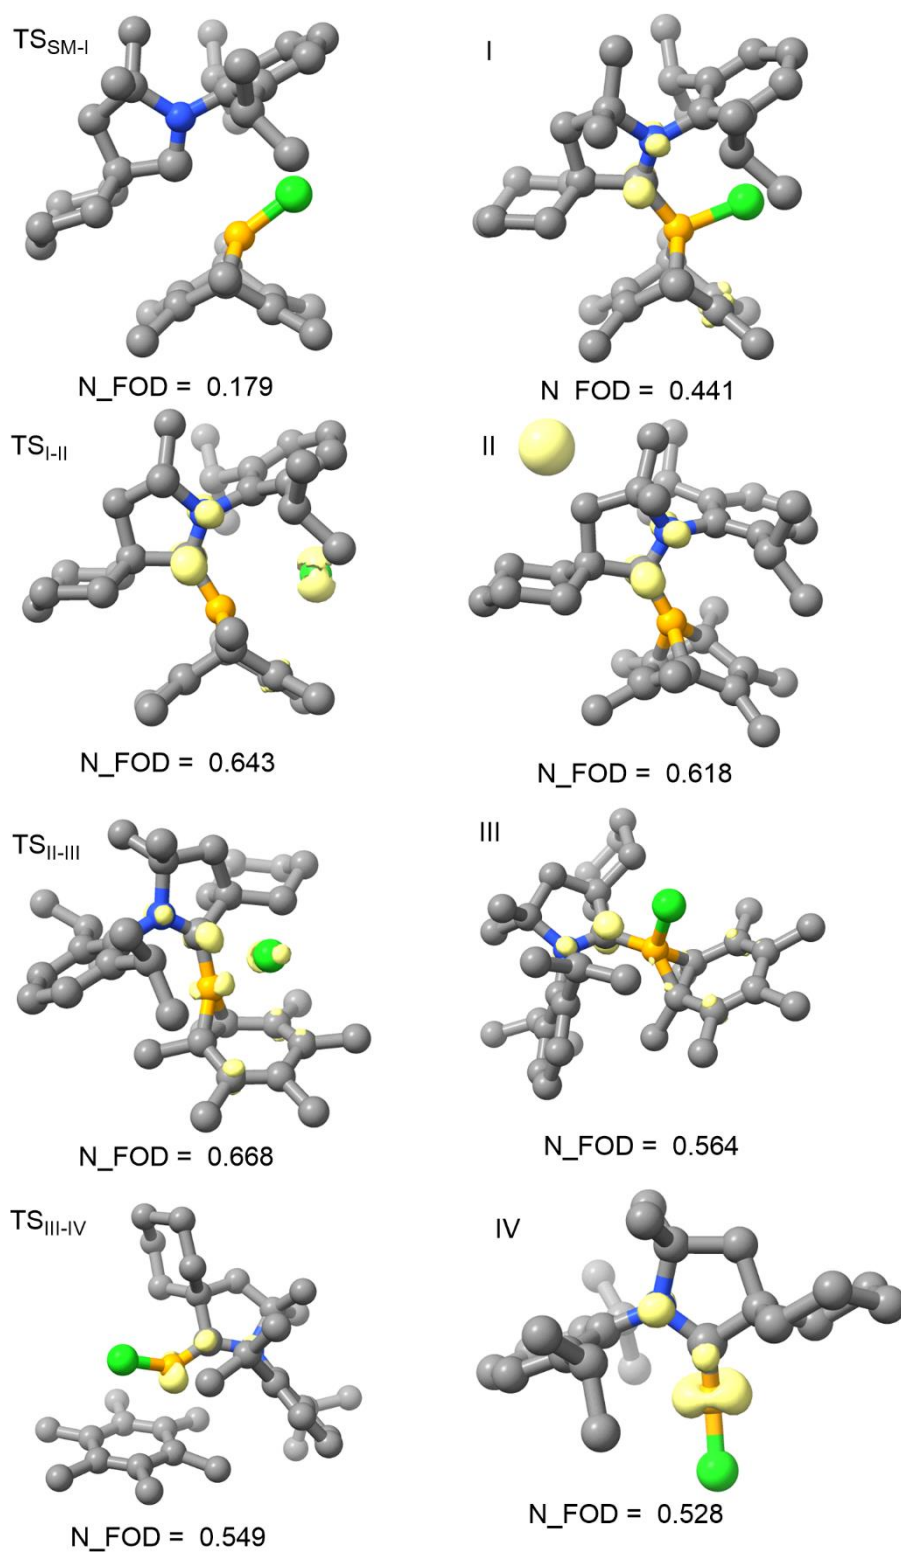

**Figure S58.** FOD plots at  $\sigma=0.005$  e Bohr<sup>-3</sup> for intermediates I, II, III, and IV and transition states TS<sub>SM-I</sub>, TS<sub>I-II</sub>, TS<sub>II-III</sub>, and TS<sub>III-IV</sub> (FOD in yellow).

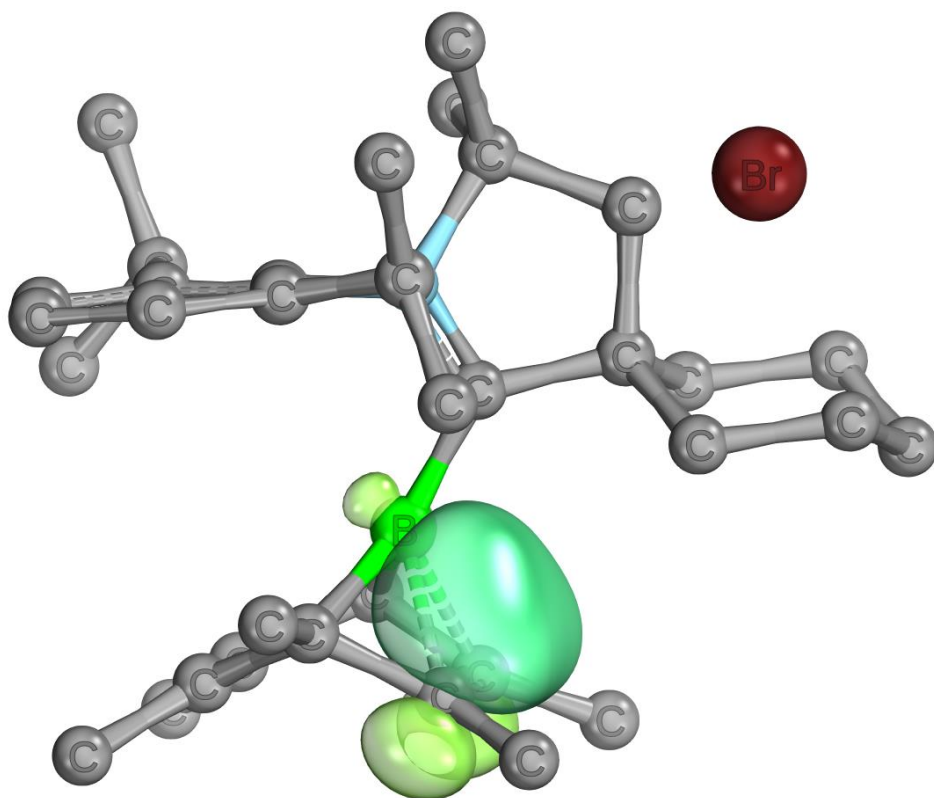

**Figure S59.** The 3c-2e bond of compound **7** depicted by IBO view.

## Discussion on other possible mechanism

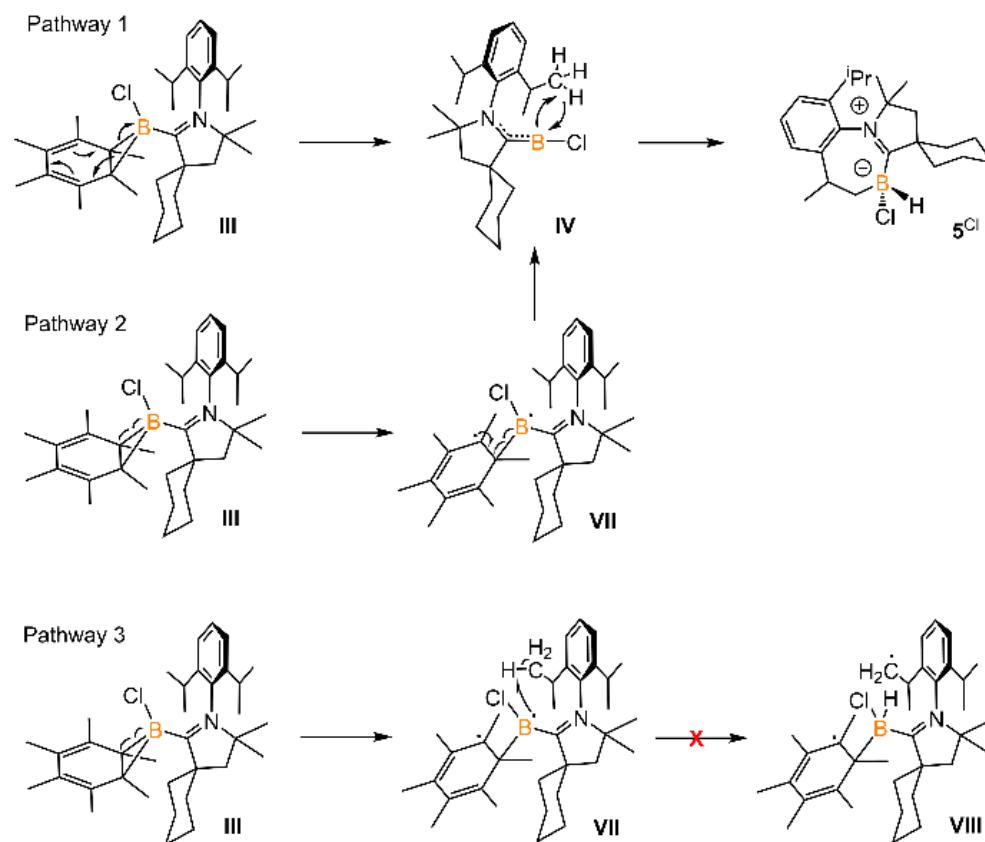

**Figure 60.** Possible reaction pathways leading to the C–H activation product

In all, there are three possible pathways to the formation of  $C_6Me_6$  and the C–H activation product from boranorcaradiene.

The first pathway is what we proposed and preferred in the manuscript. The borylene-releasing step is a two-electron step. The second pathway still involves the borylene intermediate, while the borylene-releasing step is a stepwise process. The C–B bond undergoes homolysis cleavage, giving a boron radical **VII**. The second C–B bond homolysis occurs and yields the intermediate **IV**. The third pathway does not involve the borylene intermediate. Starting from the boron radical **VII**, it abstracts a hydrogen atom of the isopropyl group and yields a primary carbon radical.

We currently cannot exclude the possibility of the second pathway while we argue that the third pathway is unlikely to be the case. Braunschweig *et al.* isolated a similar chloroborane radical, and the compound showed no reaction to the C–H bond of the CAAC ligand at room temperature.<sup>27</sup> Theoretically, it is hard to yield an unstable primary carbon radical from a stable CAAC-stabilized boron radical.



## Reference

1. Pangborn, A. B.; Giardello, M. A.; Grubbs, R. H.; Rosen, R. K.; Timmers, F. J., Safe and Convenient Procedure for Solvent Purification. *Organometallics* **1996**, *15* (5), 1518–1520.
2. Williams, D. B.; Lawton, M., Drying of organic solvents: quantitative evaluation of the efficiency of several desiccants. *J. Org. Chem.* **2010**, *75* (24), 8351–8354.
3. 1-Phenyl-2,3,4,5-Tetramethylphosphole. *Org. Synth.* **1992**, *70*.
4. Fagan, P. J.; Burns, E. G.; Calabrese, J. C., Synthesis of boroles and their use in low-temperature Diels-Alder reactions with unactivated alkenes. *J. Am. Chem. Soc.* **1988**, *110* (9), 2979–2981.
5. Tolentino, D. R.; Neale, S. E.; Isaac, C. J.; Macgregor, S. A.; Whittlesey, M. K.; Jazzar, R.; Bertrand, G., Reductive Elimination at Carbon under Steric Control. *J. Am. Chem. Soc.* **2019**, *141* (25), 9823–9826.
6. Lenz, P.; Oshimizu, R.; Klabunde, S.; Daniliuc, C. G.; Muck-Lichtenfeld, C.; Tendyck, J. C.; Mori, T.; Uhl, W.; Hansen, M. R.; Eckert, H.; Yamaguchi, S.; Studer, A., Oxy-Borylenes as Photoreductants: Synthesis and Application in Dehalogenation and Detosylation Reactions. *Angew. Chem. Int. Ed.* **2022**, *61* (42), e202209391.
7. Arduengo, A. J.; Dias, H. V. R.; Harlow, R. L.; Kline, M., Electronic stabilization of nucleophilic carbenes. *J. Am. Chem. Soc.* **1992**, *114* (14), 5530–5534.
8. Melen, R. L.; Lough, A. J.; Stephan, D. W., Boron azides in Staudinger oxidations and cycloadditions. *Dalton Trans.* **2013**, *42* (24), 8674–8683.
9. Hübner, A.; Diefenbach, M.; Bolte, M.; Lerner, H.-W.; Holthausen, M. C.; Wagner, M., Confirmation of an Early Postulate: B–C–B Two-Electron–Three-Center Bonding in Organo(hydro)boranes. *Angew. Chem. Int. Ed.* **2012**, *51* (50), 12514–12518.
10. Sheldrick, G. M., SHELXT—Integrated space-group and crystal-structure determination. *Acta Cryst. A* **2015**, *71* (1), 3–8.
11. Dolomanov, O. V.; Bourhis, L. J.; Gildea, R. J.; Howard, J. A. K.; Puschmann, H., OLEX2: a complete structure solution, refinement and analysis program. *J. Appl. Crystallogr.* **2009**, *42* (2), 339–341.
12. Sheldrick, G. M., A short history of SHELX. *Acta Cryst. A* **2008**, *64* (Pt 1), 112–122.
13. Frisch, M. J.; Trucks, G. W.; Schlegel, H. B.; Scuseria, G. E.; Robb, M. A.; Cheeseman, J. R.; Scalmani, G.; Barone, V.; Petersson, G. A.; Nakatsuji, H.; Li, X.; Caricato, M.; Marenich, A.; Bloino, J.; Janesko, B. G.; Gomperts, R.; Mennucci, B.; Hratchian, H. P.; Ortiz, J. V.; Izmaylov, A. F.; Sonnenberg, J. L.; Williams-Young, D.; Ding, F.; Lipparini, F.; Egidi, F.; Goings, J.; Peng, B.; Petrone, A.; Henderson, T.; Ranasinghe, D.; Zakrzewski, V. G.; Gao, J.; Rega, N.; Zheng, G.; Liang, W.; Hada, M.; Ehara, M.; Toyota, K.; Fukuda, R.; Hasegawa, J.; Ishida, M.; Nakajima, T.; Honda, Y.; Kitao, O.; Nakai, H.; Vreven, T.; Throssell, K.; Montgomery, J. A., Jr., J. E. P.; Ogliaro, F.; Bearpark, M.; Heyd, J. J.; Brothers, E.; Kudin, K. N.; Staroverov, V. N.; Keith, T.; Kobayashi, R.; Normand, J.; Raghavachari, K.; Rendell, A.; Burant, J. C.; Iyengar, S. S.; Tomasi, J.; Cossi, M.; Millam, J. M.; Klene, M.; Adamo, C.; Cammi, R.; Ochterski, J. W.; Martin, R. L.; Morokuma, K.; Farkas, O.; Foresman, J. B.; Fox, D. J., *Gaussian, Inc., Wallingford CT* **2016**.
14. Neese, F., Software update: The ORCA program system—Version 5.0. *WIREs Comput Mol Sci.* **2022**, *12* (5).

15. Chai, J.-D.; Head-Gordon, M., Long-range corrected hybrid density functionals with damped atom–atom dispersion corrections. *Phys. Chem. Chem. Phys.* **2008**, *10*(44), 6615.
16. McLean, A. D.; Chandler, G. S., Contracted Gaussian basis sets for molecular calculations. I. Second row atoms, Z=11-18. *J. Chem. Phys.* **1980**, *72*(10), 5639–5648.
17. Krishnan, R.; Binkley, J. S.; Seeger, R.; Pople, J. A., Self-consistent molecular orbital methods. XX. A basis set for correlated wave functions. *J. Chem. Phys.* **1980**, *72*(1), 650–654.
18. Francl, M. M.; Pietro, W. J.; Hehre, W. J.; Binkley, J. S.; Gordon, M. S.; Defrees, D. J.; Pople, J. A., Self-consistent molecular orbital methods. XXIII. A polarization-type basis set for second-row elements. *J. Chem. Phys.* **1982**, *77*(7), 3654–3665.
19. Curtiss, L. A.; McGrath, M. P.; Blaudeau, J. P.; Davis, N. E.; Binning, R. C.; Radom, L., Extension of Gaussian-2 theory to molecules containing third-row atoms Ga–Kr. *J. Chem. Phys.* **1995**, *103*(14), 6104–6113.
20. Fukui, K., Formulation of the Reaction Coordinate. *J. Phys. Chem.* **1970**, *74*(23), 4161–4163.
21. Fukui, K., The Path of Chemical Reactions - the IRC Approach. *Acc. Chem. Res.* **1981**, *14*(12), 363–368.
22. Mardirossian, N.; Head-Gordon, M., omegaB97M-V: A combinatorially optimized, range-separated hybrid, meta-GGA density functional with VV10 nonlocal correlation. *J. Chem. Phys.* **2016**, *144*(21), 214110.
23. Weigend, F.; Ahlrichs, R., Balanced basis sets of split valence, triple zeta valence and quadruple zeta valence quality for H to Rn: Design and assessment of accuracy. *Phys. Chem. Chem. Phys.* **2005**, *7*(18), 3297–3305.
24. Weigend, F., Accurate Coulomb-fitting basis sets for H to Rn. *Phys. Chem. Chem. Phys.* **2006**, *8*(9), 1057–1065.
25. Marenich, A. V.; Cramer, C. J.; Truhlar, D. G., Universal Solvation Model Based on Solute Electron Density and on a Continuum Model of the Solvent Defined by the Bulk Dielectric Constant and Atomic Surface Tensions. *J. Phys. Chem. B* **2009**, *113*(18), 6378–6396.
26. Grimme, S.; Hansen, A., A practicable real-space measure and visualization of static electron-correlation effects. *Angew. Chem. Int. Ed.* **2015**, *54*(42), 12308–12313.
27. Bissinger, P., Braunschweig, H., Damme, A., Krummenacher, I., Phukan, A.K., Radacki, K. and Sugawara, S., Isolation of a Neutral Boron-Containing Radical Stabilized by a Cyclic (Alkyl)(Amino)Carbene. *Angew. Chem. Int. Ed.* **2014**, *53*, 7360–7363.
